# Supplementary material for: Secreted Autotransporter Toxin (Sat) Mediates Innate Immune System Evasion
Source: PubMed Central journal article supplement (PMC8891578; doi:10.3389/fimmu.2022.844878), 2022-02-17
Supplement: DataSheet_1.pdf [file DataSheet_1.pdf]

**COVID-19 Information**

[Public health information \(CDC\)](#)

[Research information \(NIH\)](#)

[SARS-CoV-2 data \(NCBI\)](#)

[Prevention and treatment information \(HHS\)](#)

[Español](#)

**BLAST**® » [blastp suite](#) » results for RID-YG87CM3U01R

Job Title [Sat EC071 ...](#)  
 RID [YG87CM3U01R](#) Search expires on 01-20 21:32 pm  
 Program BLASTP  
 Database nr  
 Query ID lcl|Query\_342596  
 Description [None ...](#)  
 Molecule type amino acid  
 Query Length 1296

**Descriptions**

| Description                                                                                             | Scientific Name                                    | Max Score | Total Score | Query Cover | E value | Per. Ident | Acc. Len | Accession                      |
|---------------------------------------------------------------------------------------------------------|----------------------------------------------------|-----------|-------------|-------------|---------|------------|----------|--------------------------------|
| <a href="#">serine protease autotransporter toxin Sat [Escherichia coli]</a>                            | <a href="#">Escherichia coli</a>                   | 2631      | 2631        | 99%         | 0.0     | 100.00%    | 1295     | <a href="#">WP_001034082.1</a> |
| <a href="#">TPA: serine protease autotransporter toxin Sat [Escherichia coli]</a>                       | <a href="#">Escherichia coli</a>                   | 2630      | 2630        | 99%         | 0.0     | 99.92%     | 1295     | <a href="#">HAI6125783.1</a>   |
| <a href="#">serine protease autotransporter toxin Sat [Escherichia coli]</a>                            | <a href="#">Escherichia coli</a>                   | 2629      | 2629        | 99%         | 0.0     | 99.85%     | 1295     | <a href="#">WP_021579527.1</a> |
| <a href="#">serine protease autotransporter toxin Sat [Escherichia coli]</a>                            | <a href="#">Escherichia coli</a>                   | 2629      | 2629        | 99%         | 0.0     | 99.92%     | 1295     | <a href="#">WP_142457960.1</a> |
| <a href="#">serine protease autotransporter toxin Sat [Escherichia coli]</a>                            | <a href="#">Escherichia coli</a>                   | 2629      | 2629        | 99%         | 0.0     | 99.92%     | 1295     | <a href="#">EFK6366304.1</a>   |
| <a href="#">serine protease autotransporter toxin Sat [Escherichia coli]</a>                            | <a href="#">Escherichia coli</a>                   | 2629      | 2629        | 99%         | 0.0     | 99.92%     | 1295     | <a href="#">WP_114145544.1</a> |
| <a href="#">TPA: serine protease autotransporter toxin Sat [Escherichia coli]</a>                       | <a href="#">Escherichia coli</a>                   | 2629      | 2629        | 99%         | 0.0     | 99.92%     | 1295     | <a href="#">HBJ6073103.1</a>   |
| <a href="#">serine protease autotransporter toxin Sat [Enterobacteriaceae]</a>                          | <a href="#">Enterobacteriaceae</a>                 | 2629      | 2629        | 99%         | 0.0     | 99.85%     | 1295     | <a href="#">WP_126896457.1</a> |
| <a href="#">TPA: serine protease autotransporter toxin Sat [Escherichia coli]</a>                       | <a href="#">Escherichia coli</a>                   | 2629      | 2629        | 99%         | 0.0     | 99.85%     | 1295     | <a href="#">HAJ1961408.1</a>   |
| <a href="#">serine protease autotransporter toxin Sat [Enterobacteriaceae]</a>                          | <a href="#">Enterobacteriaceae</a>                 | 2629      | 2629        | 99%         | 0.0     | 99.92%     | 1295     | <a href="#">WP_001034083.1</a> |
| <a href="#">serine protease autotransporter toxin Sat [Escherichia coli]</a>                            | <a href="#">Escherichia coli</a>                   | 2628      | 2628        | 99%         | 0.0     | 99.92%     | 1295     | <a href="#">WP_001034084.1</a> |
| <a href="#">Accreted auto transpoter toxin [Escherichia coli str. 'clone D i2']</a>                     | <a href="#">Escherichia coli str. 'clone D i2'</a> | 2628      | 2628        | 99%         | 0.0     | 99.92%     | 1299     | <a href="#">AER85851.1</a>     |
| <a href="#">serine protease autotransporter toxin Sat [Escherichia coli]</a>                            | <a href="#">Escherichia coli</a>                   | 2628      | 2628        | 99%         | 0.0     | 99.85%     | 1295     | <a href="#">WP_033864944.1</a> |
| <a href="#">serine protease autotransporter toxin Sat [Escherichia coli]</a>                            | <a href="#">Escherichia coli</a>                   | 2628      | 2628        | 99%         | 0.0     | 99.85%     | 1295     | <a href="#">EGD9592729.1</a>   |
| <a href="#">TPA: serine protease autotransporter toxin Sat [Escherichia coli]</a>                       | <a href="#">Escherichia coli</a>                   | 2628      | 2628        | 99%         | 0.0     | 99.92%     | 1295     | <a href="#">HAL2735930.1</a>   |
| <a href="#">serine protease autotransporter toxin Sat [Escherichia coli]</a>                            | <a href="#">Escherichia coli</a>                   | 2628      | 2628        | 99%         | 0.0     | 99.92%     | 1295     | <a href="#">WP_167580541.1</a> |
| <a href="#">serine protease autotransporter toxin Sat [Escherichia coli]</a>                            | <a href="#">Escherichia coli</a>                   | 2628      | 2628        | 99%         | 0.0     | 99.92%     | 1295     | <a href="#">WP_128430364.1</a> |
| <a href="#">TPA: serine protease autotransporter toxin Sat [Escherichia coli]</a>                       | <a href="#">Escherichia coli</a>                   | 2628      | 2628        | 99%         | 0.0     | 99.85%     | 1295     | <a href="#">HAL2502625.1</a>   |
| <a href="#">serine protease autotransporter toxin Sat [Shigella sonnei]</a>                             | <a href="#">Shigella sonnei</a>                    | 2628      | 2628        | 99%         | 0.0     | 99.92%     | 1295     | <a href="#">EHI3940979.1</a>   |
| <a href="#">autotransporter outer membrane beta-barrel domain-containing protein [Escherichia coli]</a> | <a href="#">Escherichia coli</a>                   | 2628      | 2628        | 99%         | 0.0     | 99.85%     | 1295     | <a href="#">WP_219054700.1</a> |
| <a href="#">serine protease autotransporter toxin Sat [Escherichia coli]</a>                            | <a href="#">Escherichia coli</a>                   | 2628      | 2628        | 99%         | 0.0     | 99.85%     | 1295     | <a href="#">MBI9726529.1</a>   |
| <a href="#">TPA: serine protease autotransporter toxin Sat [Escherichia coli]</a>                       | <a href="#">Escherichia coli</a>                   | 2628      | 2628        | 99%         | 0.0     | 99.92%     | 1295     | <a href="#">HBB7276045.1</a>   |
| <a href="#">serine protease autotransporter toxin Sat [Escherichia coli]</a>                            | <a href="#">Escherichia coli</a>                   | 2628      | 2628        | 99%         | 0.0     | 99.85%     | 1295     | <a href="#">WP_001556799.1</a> |
| <a href="#">TPA: serine protease autotransporter toxin Sat [Escherichia coli]</a>                       | <a href="#">Escherichia coli</a>                   | 2628      | 2628        | 99%         | 0.0     | 99.85%     | 1295     | <a href="#">HBC7568876.1</a>   |
| <a href="#">TPA: serine protease autotransporter toxin Sat [Escherichia coli]</a>                       | <a href="#">Escherichia coli</a>                   | 2628      | 2628        | 99%         | 0.0     | 99.85%     | 1295     | <a href="#">HAH4707744.1</a>   |
| <a href="#">serine protease autotransporter toxin Sat [Escherichia coli]</a>                            | <a href="#">Escherichia coli</a>                   | 2628      | 2628        | 99%         | 0.0     | 99.85%     | 1295     | <a href="#">WP_021525200.1</a> |

| Description                                                                                             | Scientific Name                                 | Max Score | Total Score | Query Cover | E value | Per. Ident | Acc. Len | Accession                      |
|---------------------------------------------------------------------------------------------------------|-------------------------------------------------|-----------|-------------|-------------|---------|------------|----------|--------------------------------|
| <a href="#">TPA: serine protease autotransporter toxin Sat [Escherichia coli]</a>                       | <a href="#">Escherichia coli</a>                | 2628      | 2628        | 99%         | 0.0     | 99.85%     | 1295     | <a href="#">HBA1304970.1</a>   |
| <a href="#">serine protease autotransporter toxin Sat [Escherichia coli]</a>                            | <a href="#">Escherichia coli</a>                | 2627      | 2627        | 99%         | 0.0     | 99.85%     | 1295     | <a href="#">WP_021545254.1</a> |
| <a href="#">serine protease autotransporter toxin Sat [Escherichia coli]</a>                            | <a href="#">Escherichia coli</a>                | 2627      | 2627        | 99%         | 0.0     | 99.85%     | 1295     | <a href="#">WP_113341376.1</a> |
| <a href="#">TPA: serine protease autotransporter toxin Sat [Escherichia coli]</a>                       | <a href="#">Escherichia coli</a>                | 2627      | 2627        | 99%         | 0.0     | 99.85%     | 1295     | <a href="#">HAX8501378.1</a>   |
| <a href="#">TPA: serine protease autotransporter toxin Sat [Escherichia coli]</a>                       | <a href="#">Escherichia coli</a>                | 2627      | 2627        | 99%         | 0.0     | 99.85%     | 1295     | <a href="#">HBC8781562.1</a>   |
| <a href="#">serine protease autotransporter toxin Sat [Escherichia coli]</a>                            | <a href="#">Escherichia coli</a>                | 2627      | 2627        | 99%         | 0.0     | 99.85%     | 1295     | <a href="#">WP_049074636.1</a> |
| <a href="#">serine protease autotransporter toxin Sat [Escherichia coli]</a>                            | <a href="#">Escherichia coli</a>                | 2627      | 2627        | 99%         | 0.0     | 99.85%     | 1295     | <a href="#">WP_023150719.1</a> |
| <a href="#">serine protease sat autotransporter [Escherichia coli 1-110-08_S4_C1]</a>                   | <a href="#">Escherichia coli 1-110-08_S4_C1</a> | 2627      | 2627        | 99%         | 0.0     | 99.85%     | 1295     | <a href="#">EYE09558.1</a>     |
| <a href="#">serine protease autotransporter toxin Sat [Escherichia coli]</a>                            | <a href="#">Escherichia coli</a>                | 2627      | 2627        | 99%         | 0.0     | 99.85%     | 1295     | <a href="#">WP_021521406.1</a> |
| <a href="#">serine protease autotransporter toxin Sat [Escherichia coli]</a>                            | <a href="#">Escherichia coli</a>                | 2627      | 2627        | 99%         | 0.0     | 99.85%     | 1295     | <a href="#">MBB0498836.1</a>   |
| <a href="#">TPA: serine protease autotransporter toxin Sat [Escherichia coli]</a>                       | <a href="#">Escherichia coli</a>                | 2627      | 2627        | 99%         | 0.0     | 99.85%     | 1295     | <a href="#">HAP0967861.1</a>   |
| <a href="#">serine protease autotransporter toxin Sat [Escherichia coli]</a>                            | <a href="#">Escherichia coli</a>                | 2627      | 2627        | 99%         | 0.0     | 99.85%     | 1295     | <a href="#">WP_149846178.1</a> |
| <a href="#">serine protease autotransporter toxin Sat [Escherichia coli]</a>                            | <a href="#">Escherichia coli</a>                | 2627      | 2627        | 99%         | 0.0     | 99.85%     | 1295     | <a href="#">WP_060667427.1</a> |
| <a href="#">TPA: serine protease autotransporter toxin Sat [Escherichia coli]</a>                       | <a href="#">Escherichia coli</a>                | 2627      | 2627        | 99%         | 0.0     | 99.85%     | 1295     | <a href="#">HBI9439922.1</a>   |
| <a href="#">TPA: serine protease autotransporter toxin Sat [Escherichia coli]</a>                       | <a href="#">Escherichia coli</a>                | 2627      | 2627        | 99%         | 0.0     | 99.85%     | 1295     | <a href="#">HBI7936509.1</a>   |
| <a href="#">autotransporter outer membrane beta-barrel domain-containing protein [Escherichia coli]</a> | <a href="#">Escherichia coli</a>                | 2627      | 2627        | 99%         | 0.0     | 99.85%     | 1295     | <a href="#">WP_225394784.1</a> |
| <a href="#">serine protease autotransporter toxin Sat [Escherichia coli]</a>                            | <a href="#">Escherichia coli</a>                | 2627      | 2627        | 99%         | 0.0     | 99.85%     | 1295     | <a href="#">EHC2729660.1</a>   |
| <a href="#">TPA: serine protease autotransporter toxin Sat [Escherichia coli]</a>                       | <a href="#">Escherichia coli</a>                | 2627      | 2627        | 99%         | 0.0     | 99.85%     | 1295     | <a href="#">HAI5392434.1</a>   |
| <a href="#">TPA: serine protease autotransporter toxin Sat [Escherichia coli]</a>                       | <a href="#">Escherichia coli</a>                | 2627      | 2627        | 99%         | 0.0     | 99.85%     | 1295     | <a href="#">HAL3252735.1</a>   |
| <a href="#">serine protease autotransporter toxin Sat [Escherichia coli]</a>                            | <a href="#">Escherichia coli</a>                | 2627      | 2627        | 99%         | 0.0     | 99.85%     | 1295     | <a href="#">WP_139837327.1</a> |
| <a href="#">serine protease autotransporter toxin Sat [Escherichia coli]</a>                            | <a href="#">Escherichia coli</a>                | 2627      | 2627        | 99%         | 0.0     | 99.85%     | 1295     | <a href="#">WP_053901632.1</a> |
| <a href="#">TPA: serine protease autotransporter toxin Sat [Escherichia coli]</a>                       | <a href="#">Escherichia coli</a>                | 2627      | 2627        | 99%         | 0.0     | 99.92%     | 1295     | <a href="#">HAI3750294.1</a>   |
| <a href="#">serine protease autotransporter toxin Sat [Escherichia coli]</a>                            | <a href="#">Escherichia coli</a>                | 2627      | 2627        | 99%         | 0.0     | 99.85%     | 1295     | <a href="#">WP_113956116.1</a> |
| <a href="#">TPA: serine protease autotransporter toxin Sat [Escherichia coli]</a>                       | <a href="#">Escherichia coli</a>                | 2627      | 2627        | 99%         | 0.0     | 99.85%     | 1295     | <a href="#">HAY5190267.1</a>   |
| <a href="#">serine protease autotransporter toxin Sat [Escherichia coli]</a>                            | <a href="#">Escherichia coli</a>                | 2627      | 2627        | 99%         | 0.0     | 99.85%     | 1295     | <a href="#">MBS8788038.1</a>   |
| <a href="#">serine protease autotransporter toxin Sat [Escherichia coli]</a>                            | <a href="#">Escherichia coli</a>                | 2627      | 2627        | 99%         | 0.0     | 99.92%     | 1295     | <a href="#">WP_064232224.1</a> |
| <a href="#">serine protease autotransporter toxin Sat [Escherichia coli]</a>                            | <a href="#">Escherichia coli</a>                | 2627      | 2627        | 99%         | 0.0     | 99.85%     | 1295     | <a href="#">WP_118909407.1</a> |
| <a href="#">serine protease autotransporter toxin Sat [Escherichia coli]</a>                            | <a href="#">Escherichia coli</a>                | 2627      | 2627        | 99%         | 0.0     | 99.85%     | 1295     | <a href="#">WP_115766409.1</a> |
| <a href="#">serine protease autotransporter toxin Sat [Escherichia coli]</a>                            | <a href="#">Escherichia coli</a>                | 2627      | 2627        | 99%         | 0.0     | 99.85%     | 1295     | <a href="#">WP_001611046.1</a> |
| <a href="#">TPA: serine protease autotransporter toxin Sat [Escherichia coli]</a>                       | <a href="#">Escherichia coli</a>                | 2627      | 2627        | 99%         | 0.0     | 99.85%     | 1295     | <a href="#">HBC4963495.1</a>   |
| <a href="#">serine protease autotransporter toxin Sat [Escherichia coli]</a>                            | <a href="#">Escherichia coli</a>                | 2627      | 2627        | 99%         | 0.0     | 99.85%     | 1295     | <a href="#">EFH8304360.1</a>   |
| <a href="#">TPA: serine protease autotransporter toxin Sat [Escherichia coli O25b:H4-ST131]</a>         | <a href="#">Escherichia coli O25b:H4-ST131</a>  | 2627      | 2627        | 99%         | 0.0     | 99.85%     | 1295     | <a href="#">HAN2555901.1</a>   |
| <a href="#">serine protease autotransporter toxin Sat [Escherichia coli]</a>                            | <a href="#">Escherichia coli</a>                | 2627      | 2627        | 99%         | 0.0     | 99.85%     | 1295     | <a href="#">MBI9242867.1</a>   |
| <a href="#">TPA: serine protease autotransporter toxin Sat [Escherichia coli]</a>                       | <a href="#">Escherichia coli</a>                | 2627      | 2627        | 99%         | 0.0     | 99.92%     | 1295     | <a href="#">HAM4370941.1</a>   |
| <a href="#">serine protease autotransporter toxin Sat [Escherichia coli]</a>                            | <a href="#">Escherichia coli</a>                | 2627      | 2627        | 99%         | 0.0     | 99.85%     | 1295     | <a href="#">WP_059319927.1</a> |
| <a href="#">serine protease autotransporter toxin Sat [Escherichia coli]</a>                            | <a href="#">Escherichia coli</a>                | 2627      | 2627        | 99%         | 0.0     | 99.85%     | 1295     | <a href="#">WP_113495884.1</a> |
| <a href="#">serine protease autotransporter toxin Sat [Escherichia coli]</a>                            | <a href="#">Escherichia coli</a>                | 2627      | 2627        | 99%         | 0.0     | 99.85%     | 1295     | <a href="#">WP_116991798.1</a> |
| <a href="#">serine protease autotransporter toxin Sat [Escherichia coli]</a>                            | <a href="#">Escherichia coli</a>                | 2627      | 2627        | 99%         | 0.0     | 99.92%     | 1294     | <a href="#">WP_140402642.1</a> |
| <a href="#">serine protease autotransporter toxin Sat [Escherichia coli]</a>                            | <a href="#">Escherichia coli</a>                | 2627      | 2627        | 99%         | 0.0     | 99.85%     | 1295     | <a href="#">WP_169783511.1</a> |
| <a href="#">serine protease autotransporter toxin Sat [Escherichia coli]</a>                            | <a href="#">Escherichia coli</a>                | 2627      | 2627        | 99%         | 0.0     | 99.85%     | 1295     | <a href="#">EEY5188439.1</a>   |
| <a href="#">TPA: serine protease autotransporter toxin Sat [Escherichia coli]</a>                       | <a href="#">Escherichia coli</a>                | 2627      | 2627        | 99%         | 0.0     | 99.85%     | 1295     | <a href="#">HAG7649195.1</a>   |

| Description                                                                                             | Scientific Name                           | Max Score | Total Score | Query Cover | E value | Per. Ident | Acc. Len | Accession                      |
|---------------------------------------------------------------------------------------------------------|-------------------------------------------|-----------|-------------|-------------|---------|------------|----------|--------------------------------|
| <a href="#">TPA: serine protease autotransporter toxin Sat [Escherichia coli]</a>                       | <a href="#">Escherichia coli</a>          | 2627      | 2627        | 99%         | 0.0     | 99.85%     | 1295     | <a href="#">HBB1193796.1</a>   |
| <a href="#">serine protease autotransporter toxin Sat [Escherichia coli]</a>                            | <a href="#">Escherichia coli</a>          | 2627      | 2627        | 99%         | 0.0     | 99.85%     | 1295     | <a href="#">WP_181203932.1</a> |
| <a href="#">TPA: serine protease autotransporter toxin Sat [Escherichia coli]</a>                       | <a href="#">Escherichia coli</a>          | 2627      | 2627        | 99%         | 0.0     | 99.85%     | 1295     | <a href="#">HAH6736077.1</a>   |
| <a href="#">TPA: serine protease autotransporter toxin Sat [Escherichia coli]</a>                       | <a href="#">Escherichia coli</a>          | 2627      | 2627        | 99%         | 0.0     | 99.92%     | 1294     | <a href="#">HAN3395805.1</a>   |
| <a href="#">TPA: serine protease autotransporter toxin Sat [Escherichia coli]</a>                       | <a href="#">Escherichia coli</a>          | 2627      | 2627        | 99%         | 0.0     | 99.85%     | 1295     | <a href="#">HAO7397004.1</a>   |
| <a href="#">TPA: serine protease autotransporter toxin Sat [Escherichia coli]</a>                       | <a href="#">Escherichia coli</a>          | 2627      | 2627        | 99%         | 0.0     | 99.85%     | 1295     | <a href="#">HAI3867277.1</a>   |
| <a href="#">TPA: serine protease autotransporter toxin Sat [Escherichia coli]</a>                       | <a href="#">Escherichia coli</a>          | 2627      | 2627        | 99%         | 0.0     | 99.85%     | 1295     | <a href="#">HBA4320359.1</a>   |
| <a href="#">TPA: serine protease autotransporter toxin Sat [Escherichia coli]</a>                       | <a href="#">Escherichia coli</a>          | 2627      | 2627        | 99%         | 0.0     | 99.85%     | 1295     | <a href="#">HAG9275443.1</a>   |
| <a href="#">TPA: serine protease autotransporter toxin Sat [Escherichia coli MVA5T158]</a>              | <a href="#">Escherichia coli MVA5T158</a> | 2627      | 2627        | 99%         | 0.0     | 99.85%     | 1295     | <a href="#">HAX0142153.1</a>   |
| <a href="#">serine protease autotransporter toxin Sat [Escherichia coli]</a>                            | <a href="#">Escherichia coli</a>          | 2627      | 2627        | 99%         | 0.0     | 99.85%     | 1295     | <a href="#">WP_155951915.1</a> |
| <a href="#">autotransporter outer membrane beta-barrel domain-containing protein [Escherichia coli]</a> | <a href="#">Escherichia coli</a>          | 2627      | 2627        | 99%         | 0.0     | 99.92%     | 1295     | <a href="#">WP_225390149.1</a> |
| <a href="#">autotransporter outer membrane beta-barrel domain-containing protein [Escherichia coli]</a> | <a href="#">Escherichia coli</a>          | 2627      | 2627        | 99%         | 0.0     | 99.85%     | 1295     | <a href="#">WP_217822457.1</a> |
| <a href="#">serine protease autotransporter toxin Sat [Shigella flexneri]</a>                           | <a href="#">Shigella flexneri</a>         | 2627      | 2627        | 99%         | 0.0     | 99.85%     | 1295     | <a href="#">EFP7778397.1</a>   |
| <a href="#">TPA: serine protease autotransporter toxin Sat [Escherichia coli]</a>                       | <a href="#">Escherichia coli</a>          | 2627      | 2627        | 99%         | 0.0     | 99.85%     | 1295     | <a href="#">HAM6401014.1</a>   |
| <a href="#">serine protease autotransporter toxin Sat [Escherichia coli]</a>                            | <a href="#">Escherichia coli</a>          | 2627      | 2627        | 99%         | 0.0     | 99.85%     | 1295     | <a href="#">WP_094316666.1</a> |
| <a href="#">serine protease autotransporter toxin Sat [Escherichia coli]</a>                            | <a href="#">Escherichia coli</a>          | 2627      | 2627        | 99%         | 0.0     | 99.85%     | 1295     | <a href="#">MBB0854235.1</a>   |
| <a href="#">serine protease autotransporter toxin Sat [Escherichia coli]</a>                            | <a href="#">Escherichia coli</a>          | 2627      | 2627        | 99%         | 0.0     | 99.85%     | 1295     | <a href="#">NPP26331.1</a>     |
| <a href="#">autotransporter outer membrane beta-barrel domain-containing protein [Escherichia coli]</a> | <a href="#">Escherichia coli</a>          | 2627      | 2627        | 99%         | 0.0     | 99.85%     | 1295     | <a href="#">WP_199351549.1</a> |
| <a href="#">TPA: serine protease autotransporter toxin Sat [Escherichia coli]</a>                       | <a href="#">Escherichia coli</a>          | 2627      | 2627        | 99%         | 0.0     | 99.85%     | 1295     | <a href="#">HBA1072022.1</a>   |
| <a href="#">autotransporter outer membrane beta-barrel domain-containing protein [Escherichia coli]</a> | <a href="#">Escherichia coli</a>          | 2627      | 2627        | 99%         | 0.0     | 99.92%     | 1299     | <a href="#">OSP32553.1</a>     |
| <a href="#">TPA: serine protease autotransporter toxin Sat [Escherichia coli]</a>                       | <a href="#">Escherichia coli</a>          | 2627      | 2627        | 99%         | 0.0     | 99.85%     | 1295     | <a href="#">HBD2267896.1</a>   |
| <a href="#">TPA: serine protease autotransporter toxin Sat [Escherichia coli]</a>                       | <a href="#">Escherichia coli</a>          | 2627      | 2627        | 99%         | 0.0     | 99.85%     | 1295     | <a href="#">HAX7888640.1</a>   |
| <a href="#">TPA: serine protease autotransporter toxin Sat [Escherichia coli]</a>                       | <a href="#">Escherichia coli</a>          | 2627      | 2627        | 99%         | 0.0     | 99.85%     | 1295     | <a href="#">HAL3865995.1</a>   |
| <a href="#">TPA: serine protease autotransporter toxin Sat [Escherichia coli]</a>                       | <a href="#">Escherichia coli</a>          | 2627      | 2627        | 99%         | 0.0     | 99.77%     | 1295     | <a href="#">HBA4313454.1</a>   |
| <a href="#">serine protease autotransporter toxin Sat [Escherichia coli]</a>                            | <a href="#">Escherichia coli</a>          | 2627      | 2627        | 99%         | 0.0     | 99.85%     | 1295     | <a href="#">WP_048228344.1</a> |
| <a href="#">TPA: serine protease autotransporter toxin Sat [Escherichia coli]</a>                       | <a href="#">Escherichia coli</a>          | 2627      | 2627        | 99%         | 0.0     | 99.85%     | 1295     | <a href="#">HBM2060318.1</a>   |
| <a href="#">TPA: serine protease autotransporter toxin Sat [Escherichia coli]</a>                       | <a href="#">Escherichia coli</a>          | 2627      | 2627        | 99%         | 0.0     | 99.85%     | 1295     | <a href="#">HAJ3750798.1</a>   |
| <a href="#">TPA: serine protease autotransporter toxin Sat [Escherichia coli]</a>                       | <a href="#">Escherichia coli</a>          | 2627      | 2627        | 99%         | 0.0     | 99.85%     | 1295     | <a href="#">HBC6041500.1</a>   |
| <a href="#">serine protease autotransporter toxin Sat [Escherichia coli]</a>                            | <a href="#">Escherichia coli</a>          | 2627      | 2627        | 99%         | 0.0     | 99.85%     | 1295     | <a href="#">MSI96964.1</a>     |
| <a href="#">serine protease autotransporter toxin Sat [Escherichia coli]</a>                            | <a href="#">Escherichia coli</a>          | 2627      | 2627        | 99%         | 0.0     | 99.85%     | 1295     | <a href="#">MBI9784956.1</a>   |
| <a href="#">serine protease autotransporter toxin Sat [Escherichia coli]</a>                            | <a href="#">Escherichia coli</a>          | 2627      | 2627        | 99%         | 0.0     | 99.85%     | 1295     | <a href="#">WP_181199831.1</a> |
| <a href="#">TPA: serine protease autotransporter toxin Sat [Escherichia coli]</a>                       | <a href="#">Escherichia coli</a>          | 2627      | 2627        | 99%         | 0.0     | 99.85%     | 1295     | <a href="#">HBE4050048.1</a>   |
| <a href="#">TPA: serine protease autotransporter toxin Sat [Escherichia coli]</a>                       | <a href="#">Escherichia coli</a>          | 2627      | 2627        | 99%         | 0.0     | 99.85%     | 1295     | <a href="#">HBK1370968.1</a>   |

Graphic Summary

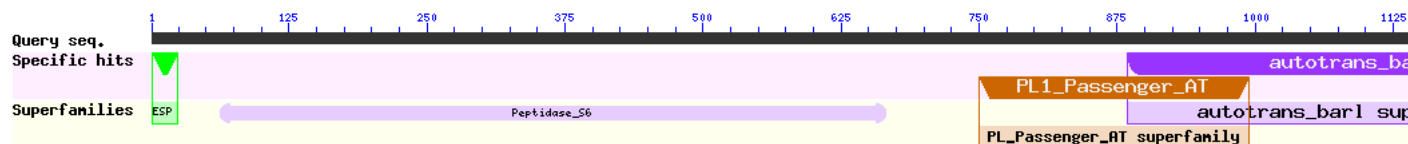

Distribution of the top 100 Blast Hits on 100 subject sequences

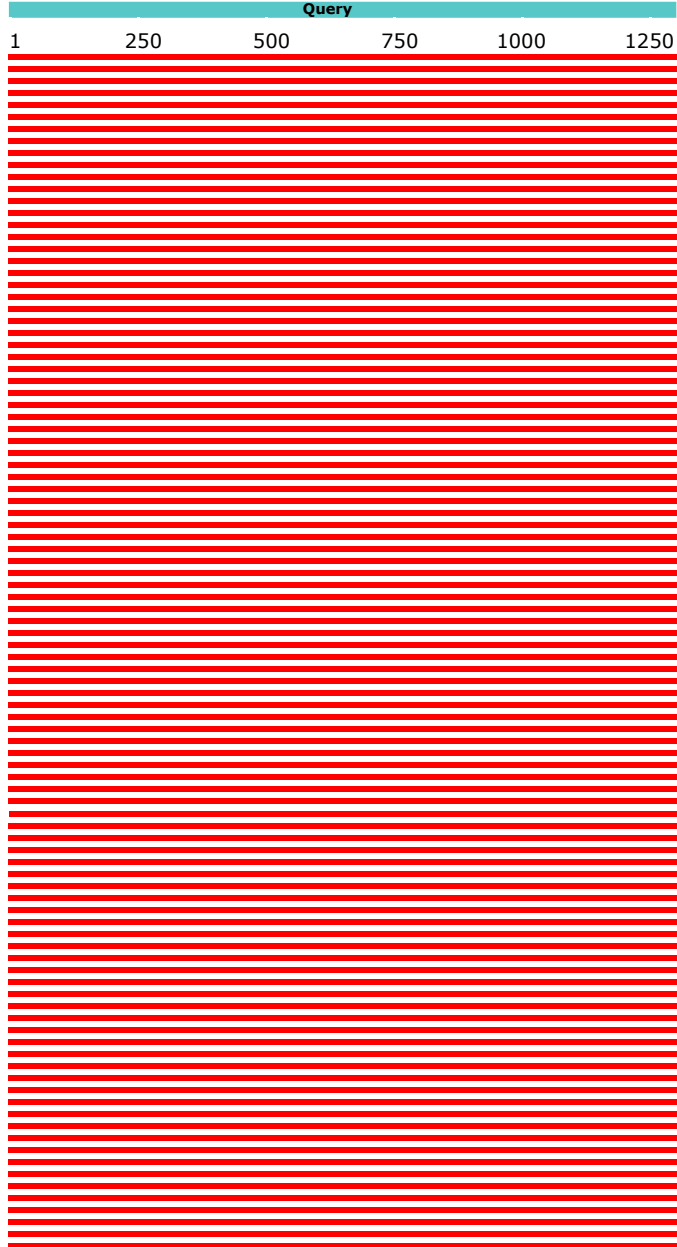

Alignments

Alignment view  Line length:

Query range 1: 1 to 90

|                |   |                                                                                           |    |
|----------------|---|-------------------------------------------------------------------------------------------|----|
| Query          | 1 | MNKIYSLKYS AATGGLIAVSELAKRVSGKTRKLVATMLSLAVAGTVNAANIDISNVWARDYLDLAQNKGFQPGATDVTITLKNKDFKS | 90 |
| WP_001034082.1 | 1 | .....                                                                                     | 90 |
| HAI6125783.1   | 1 | .....                                                                                     | 90 |
| WP_021579527.1 | 1 | .....                                                                                     | 90 |
| WP_142457960.1 | 1 | .....                                                                                     | 90 |
| EFK6366304.1   | 1 | .....                                                                                     | 90 |
| WP_114145544.1 | 1 | .....                                                                                     | 90 |
| HBJ6073103.1   | 1 | .....                                                                                     | 90 |
| WP_126896457.1 | 1 | .....                                                                                     | 90 |
| HAI1961408.1   | 1 | .....                                                                                     | 90 |
| WP_001034083.1 | 1 | .....                                                                                     | 90 |
| WP_001034084.1 | 1 | .....                                                                                     | 90 |
| AER85851.1     | 5 | .....                                                                                     | 94 |
| WP_033864944.1 | 1 | .....                                                                                     | 90 |
| EGD9592729.1   | 1 | .....                                                                                     | 90 |
| HAL2735930.1   | 1 | .....                                                                                     | 90 |
| WP_167580541.1 | 1 | .....                                                                                     | 90 |
| WP_128430364.1 | 1 | .....                                                                                     | 90 |
| HAL2502625.1   | 1 | .....                                                                                     | 90 |
| EHI3940979.1   | 1 | .....                                                                                     | 90 |
| WP_219054700.1 | 1 | .....                                                                                     | 90 |
| MBI9726529.1   | 1 | .....                                                                                     | 90 |
| HBB7276045.1   | 1 | .....                                                                                     | 90 |
| WP_001556799.1 | 1 | .....                                                                                     | 90 |
| HBC7568876.1   | 1 | .....                                                                                     | 90 |
| HAH4707744.1   | 1 | .....                                                                                     | 90 |
| WP_021525200.1 | 1 | .....                                                                                     | 90 |
| HBA1304970.1   | 1 | .....                                                                                     | 90 |
| WP_021545254.1 | 1 | .....                                                                                     | 90 |
| WP_113341376.1 | 1 | .....                                                                                     | 90 |
| HAX8501378.1   | 1 | .....                                                                                     | 90 |
| HBC8781562.1   | 1 | .....                                                                                     | 90 |
| WP_049074636.1 | 1 | ..... T .....                                                                             | 90 |
| WP_023150719.1 | 1 | .....                                                                                     | 90 |
| EYE09558.1     | 1 | .....                                                                                     | 90 |
| WP_021521406.1 | 1 | .....                                                                                     | 90 |
| MBB0498836.1   | 1 | .....                                                                                     | 90 |
| HAP0967861.1   | 1 | .....                                                                                     | 90 |
| WP_149846178.1 | 1 | .....                                                                                     | 90 |
| WP_060667427.1 | 1 | .....                                                                                     | 90 |
| HBI9439922.1   | 1 | .....                                                                                     | 90 |
| HBI7936509.1   | 1 | .....                                                                                     | 90 |

|                |   |       |    |
|----------------|---|-------|----|
| WP_225394784.1 | 1 | ..... | 90 |
| EHC2729660.1   | 1 | ..... | 90 |
| HAI5392434.1   | 1 | ..... | 90 |
| HAL3252735.1   | 1 | ..... | 90 |
| WP_139837327.1 | 1 | ..... | 90 |
| WP_053901632.1 | 1 | ..... | 90 |
| HAI3750294.1   | 1 | ..... | 90 |
| WP_113956116.1 | 1 | ..... | 90 |
| HAY5190267.1   | 1 | ..... | 90 |
| MBS8788038.1   | 1 | ..... | 90 |
| WP_064232224.1 | 1 | ..... | 90 |
| WP_118909407.1 | 1 | ..... | 90 |
| WP_115766409.1 | 1 | ..... | 90 |
| WP_001611046.1 | 1 | ..... | 90 |
| HBC4963495.1   | 1 | ..... | 90 |
| EFH8304360.1   | 1 | ..... | 90 |
| HAN2555901.1   | 1 | ..... | 90 |
| MBI9242867.1   | 1 | ..... | 90 |
| HAM4370941.1   | 1 | ..... | 90 |
| WP_059319927.1 | 1 | ..... | 90 |
| WP_113495884.1 | 1 | ..... | 90 |
| WP_116991798.1 | 1 | ..... | 90 |
| WP_140402642.1 | 1 | ..... | 90 |
| WP_169783511.1 | 1 | ..... | 90 |
| EEY5188439.1   | 1 | ..... | 90 |
| HAG7649195.1   | 1 | ..... | 90 |
| HBB1193796.1   | 1 | ..... | 90 |
| WP_181203932.1 | 1 | ..... | 90 |
| HAH6736077.1   | 1 | ..... | 90 |
| HAN3395805.1   | 1 | ..... | 89 |
| HAO7397004.1   | 1 | ..... | 90 |
| HAI3867277.1   | 1 | ..... | 90 |
| HBA4320359.1   | 1 | ..... | 90 |
| HAG9275443.1   | 1 | ..... | 90 |
| HAX0142153.1   | 1 | ..... | 90 |
| WP_155951915.1 | 1 | ..... | 90 |
| WP_225390149.1 | 1 | ..... | 90 |
| WP_217822457.1 | 1 | ..... | 90 |
| FFP7778397.1   | 1 | ..... | 90 |
| HAM6401014.1   | 1 | ..... | 90 |
| WP_094316666.1 | 1 | ..... | 90 |
| MBB0854235.1   | 1 | ..... | 90 |
| NPP26331.1     | 1 | ..... | 90 |
| WP_199351549.1 | 1 | ..... | 90 |
| HBA1072022.1   | 1 | ..... | 90 |
| OSP32553.1     | 5 | ..... | 94 |
| HBD2267896.1   | 1 | ..... | 90 |
| HAX7888640.1   | 1 | ..... | 90 |
| HAL3865995.1   | 1 | ..... | 90 |
| HBA4313454.1   | 1 | ..... | 90 |
| WP_048228344.1 | 1 | ..... | 90 |
| HBM2060318.1   | 1 | ..... | 90 |
| HAI3750798.1   | 1 | ..... | 90 |
| HBC6041500.1   | 1 | ..... | 90 |
| MSI96964.1     | 1 | ..... | 90 |
| MBI9784956.1   | 1 | ..... | 90 |
| WP_181199831.1 | 1 | ..... | 90 |
| HBE4050048.1   | 1 | ..... | 90 |
| HBK1370968.1   | 1 | ..... | 90 |

Query range 2: 91 to 180

|                |    |                                                                                           |     |
|----------------|----|-------------------------------------------------------------------------------------------|-----|
| Query          | 91 | FHNLSPDFSGAAASGAATAIGGSYSVTVAHNKNKPQAAETQVYAQSYYKVVDRRNSNDFEIQRLNKFVVETVGATPAETNPTTYSDALE | 180 |
| WP_001034082.1 | 91 | .....                                                                                     | 180 |
| HAI6125783.1   | 91 | .....                                                                                     | 180 |
| WP_021579527.1 | 91 | .....                                                                                     | 180 |
| WP_142457960.1 | 91 | .....                                                                                     | 180 |
| EFK6366304.1   | 91 | .....                                                                                     | 180 |
| WP_114145544.1 | 91 | .....                                                                                     | 180 |
| HBJ6073103.1   | 91 | .....                                                                                     | 180 |
| WP_126896457.1 | 91 | .....                                                                                     | 180 |
| HAI1961408.1   | 91 | .....                                                                                     | 180 |
| WP_001034083.1 | 91 | .....                                                                                     | 180 |
| WP_001034084.1 | 91 | .....                                                                                     | 180 |
| AER85851.1     | 95 | .....                                                                                     | 184 |
| WP_033864944.1 | 91 | .....                                                                                     | 180 |
| EGD9592729.1   | 91 | .....                                                                                     | 180 |
| HAL2735930.1   | 91 | .....                                                                                     | 180 |
| WP_167580541.1 | 91 | .....                                                                                     | 180 |
| WP_128430364.1 | 91 | .....                                                                                     | 180 |
| HAL2502625.1   | 91 | .....                                                                                     | 180 |
| EHI3940979.1   | 91 | .....                                                                                     | 180 |
| WP_219054700.1 | 91 | .....                                                                                     | 180 |
| MBI9726529.1   | 91 | .....                                                                                     | 180 |
| HBB7276045.1   | 91 | .....                                                                                     | 180 |
| WP_001556799.1 | 91 | .....                                                                                     | 180 |
| HBC7568876.1   | 91 | .....                                                                                     | 180 |
| HAH4707744.1   | 91 | .....                                                                                     | 180 |
| WP_021525200.1 | 91 | .....                                                                                     | 180 |
| HBA1304970.1   | 91 | .....                                                                                     | 180 |
| WP_021545254.1 | 91 | .....                                                                                     | 180 |
| WP_113341376.1 | 91 | .....                                                                                     | 180 |
| HAX8501378.1   | 91 | .....                                                                                     | 180 |
| HBC8781562.1   | 91 | .....                                                                                     | 180 |
| WP_049074636.1 | 91 | .....                                                                                     | 180 |
| WP_023150719.1 | 91 | .....                                                                                     | 180 |
| EYE09558.1     | 91 | .....                                                                                     | 180 |
| WP_021521406.1 | 91 | .....                                                                                     | 180 |
| MBB0498836.1   | 91 | .....                                                                                     | 180 |
| HAP0967861.1   | 91 | .....                                                                                     | 180 |
| WP_149846178.1 | 91 | .....                                                                                     | 180 |
| WP_060667427.1 | 91 | .....                                                                                     | 180 |
| HBI9439922.1   | 91 | .....                                                                                     | 180 |
| HBI7936509.1   | 91 | .....                                                                                     | 180 |
| WP_225394784.1 | 91 | .....                                                                                     | 180 |
| EHC2729660.1   | 91 | .....                                                                                     | 180 |
| HAI5392434.1   | 91 | .....                                                                                     | 180 |
| HAL3252735.1   | 91 | .....                                                                                     | 180 |
| WP_139837327.1 | 91 | .....                                                                                     | 180 |
| WP_053901632.1 | 91 | .....                                                                                     | 180 |
| HAI3750294.1   | 91 | .....                                                                                     | 180 |
| WP_113956116.1 | 91 | .....                                                                                     | 180 |
| HAY5190267.1   | 91 | .....                                                                                     | 180 |
| MBS8788038.1   | 91 | .....                                                                                     | 180 |
| WP_064232224.1 | 91 | .....                                                                                     | 180 |
| WP_118909407.1 | 91 | .....                                                                                     | 180 |
| WP_115766409.1 | 91 | .....                                                                                     | 180 |
| WP_001611046.1 | 91 | .....                                                                                     | 180 |
| HBC4963495.1   | 91 | .....                                                                                     | 180 |
| EFH8304360.1   | 91 | .....                                                                                     | 180 |
| HAN2555901.1   | 91 | .....                                                                                     | 180 |
| MBI9242867.1   | 91 | .....                                                                                     | 180 |
| HAM4370941.1   | 91 | .....                                                                                     | 180 |
| WP_059319927.1 | 91 | .....                                                                                     | 180 |
| WP_113495884.1 | 91 | .....                                                                                     | 180 |
| WP_116991798.1 | 91 | .....                                                                                     | 180 |
| WP_140402642.1 | 91 | .....                                                                                     | 180 |
| WP_169783511.1 | 91 | .....                                                                                     | 180 |

|                |    |             |     |
|----------------|----|-------------|-----|
| EEY5188439.1   | 91 | .....       | 180 |
| HAG7649195.1   | 91 | .....       | 180 |
| HBB1193796.1   | 91 | .....       | 180 |
| WP_181203932.1 | 91 | .....       | 180 |
| HAH6736077.1   | 91 | .....       | 180 |
| HAN3395805.1   | 90 | .....       | 179 |
| HAO7397004.1   | 91 | .....       | 180 |
| HAI3867277.1   | 91 | .....I..... | 180 |
| HBA4320359.1   | 91 | .....       | 180 |
| HAG9275443.1   | 91 | .....       | 180 |
| HAX0142153.1   | 91 | .....       | 180 |
| WP_155951915.1 | 91 | .....       | 180 |
| WP_225390149.1 | 91 | .....       | 180 |
| WP_217822457.1 | 91 | .....       | 180 |
| FFP7778397.1   | 91 | .....       | 180 |
| HAM6401014.1   | 91 | .....       | 180 |
| WP_094316666.1 | 91 | .....       | 180 |
| MBB0854235.1   | 91 | .....       | 180 |
| NPP26331.1     | 91 | .....       | 180 |
| WP_199351549.1 | 91 | .....P..... | 180 |
| HBA1072022.1   | 91 | .....       | 180 |
| OSP32553.1     | 95 | .....       | 184 |
| HBD2267896.1   | 91 | .....       | 180 |
| HAX7888640.1   | 91 | .....       | 180 |
| HAL3865995.1   | 91 | .....       | 180 |
| HBA4313454.1   | 91 | .....       | 180 |
| WP_048228344.1 | 91 | .....       | 180 |
| HBM2060318.1   | 91 | .....V..... | 180 |
| HAI3750798.1   | 91 | .....V..... | 180 |
| HBC6041500.1   | 91 | .....       | 180 |
| MSI96964.1     | 91 | .....       | 180 |
| MBI9784956.1   | 91 | .....       | 180 |
| WP_181199831.1 | 91 | .....       | 180 |
| HBE4050048.1   | 91 | .....       | 180 |
| HBK1370968.1   | 91 | .....       | 180 |

Query range 3: 181 to 270

|                |     |                                                                                           |     |
|----------------|-----|-------------------------------------------------------------------------------------------|-----|
| Query          | 181 | RYGIVTSDGSKKIIFRAGSGGTSFINGESKISTNSAYSHELLSASLFEVTQWDSYGMIIYKNDKTRFNLEIFGDSGSGAYLYDNKLEKW | 270 |
| WP_001034082.1 | 181 | .....                                                                                     | 270 |
| HAI6125783.1   | 181 | .....T.....                                                                               | 270 |
| WP_021579527.1 | 181 | .....                                                                                     | 270 |
| WP_142457960.1 | 181 | .....                                                                                     | 270 |
| EFK6366304.1   | 181 | .....                                                                                     | 270 |
| WP_114145544.1 | 181 | .....                                                                                     | 270 |
| HBJ6073103.1   | 181 | .....                                                                                     | 270 |
| WP_126896457.1 | 181 | .....                                                                                     | 270 |
| HAI1961408.1   | 181 | .....                                                                                     | 270 |
| WP_001034083.1 | 181 | .....                                                                                     | 270 |
| WP_001034084.1 | 181 | .....                                                                                     | 270 |
| AER85851.1     | 185 | .....                                                                                     | 274 |
| WP_033864944.1 | 181 | .....                                                                                     | 270 |
| EGD9592729.1   | 181 | .....                                                                                     | 270 |
| HAL2735930.1   | 181 | .....                                                                                     | 270 |
| WP_167580541.1 | 181 | .....                                                                                     | 270 |
| WP_128430364.1 | 181 | .....                                                                                     | 270 |
| HAL2502625.1   | 181 | .....                                                                                     | 270 |
| EHI3940979.1   | 181 | .....                                                                                     | 270 |
| WP_219054700.1 | 181 | .....                                                                                     | 270 |
| MBI9726529.1   | 181 | .....                                                                                     | 270 |
| HBB7276045.1   | 181 | .....                                                                                     | 270 |
| WP_001556799.1 | 181 | .....                                                                                     | 270 |
| HBC7568876.1   | 181 | .....                                                                                     | 270 |
| HAH4707744.1   | 181 | .....                                                                                     | 270 |
| WP_021525200.1 | 181 | .....                                                                                     | 270 |
| HBA1304970.1   | 181 | .....                                                                                     | 270 |
| WP_021545254.1 | 181 | .....                                                                                     | 270 |
| WP_113341376.1 | 181 | .....                                                                                     | 270 |
| HAX8501378.1   | 181 | .....                                                                                     | 270 |
| HBC8781562.1   | 181 | .....                                                                                     | 270 |
| WP_049074636.1 | 181 | .....                                                                                     | 270 |
| WP_023150719.1 | 181 | .....                                                                                     | 270 |
| EYE09558.1     | 181 | .....                                                                                     | 270 |
| WP_021521406.1 | 181 | .....                                                                                     | 270 |
| MBB0498836.1   | 181 | .....                                                                                     | 270 |
| HAP0967861.1   | 181 | .....                                                                                     | 270 |
| WP_149846178.1 | 181 | .....                                                                                     | 270 |
| WP_060667427.1 | 181 | .....                                                                                     | 270 |
| HBI9439922.1   | 181 | .....                                                                                     | 270 |
| HBI7936509.1   | 181 | .....                                                                                     | 270 |
| WP_225394784.1 | 181 | .....                                                                                     | 270 |
| EHC2729660.1   | 181 | .....                                                                                     | 270 |
| HAI5392434.1   | 181 | .....                                                                                     | 270 |
| HAL3252735.1   | 181 | .....                                                                                     | 270 |
| WP_139837327.1 | 181 | .....                                                                                     | 270 |
| WP_053901632.1 | 181 | .....                                                                                     | 270 |
| HAI3750294.1   | 181 | .....                                                                                     | 270 |
| WP_113956116.1 | 181 | .....                                                                                     | 270 |
| HAY5190267.1   | 181 | .....                                                                                     | 270 |
| MBS8788038.1   | 181 | .....                                                                                     | 270 |
| WP_064232224.1 | 181 | .....                                                                                     | 270 |
| WP_118909407.1 | 181 | .....P.....                                                                               | 270 |
| WP_115766409.1 | 181 | .....                                                                                     | 270 |
| WP_001611046.1 | 181 | .....                                                                                     | 270 |
| HBC4963495.1   | 181 | .....                                                                                     | 270 |
| EFH8304360.1   | 181 | .....                                                                                     | 270 |
| HAN2555901.1   | 181 | .....                                                                                     | 270 |
| MBI9242867.1   | 181 | .....                                                                                     | 270 |
| HAM4370941.1   | 181 | .....                                                                                     | 270 |
| WP_059319927.1 | 181 | .....                                                                                     | 270 |
| WP_113495884.1 | 181 | .....                                                                                     | 270 |
| WP_116991798.1 | 181 | .....                                                                                     | 270 |
| WP_140402642.1 | 181 | .....                                                                                     | 270 |
| WP_169783511.1 | 181 | .....                                                                                     | 270 |
| EEY5188439.1   | 181 | .....                                                                                     | 270 |
| HAG7649195.1   | 181 | .....                                                                                     | 270 |
| HBB1193796.1   | 181 | .....                                                                                     | 270 |
| WP_181203932.1 | 181 | .....I.....                                                                               | 270 |
| HAH6736077.1   | 181 | .....                                                                                     | 270 |
| HAN3395805.1   | 180 | .....                                                                                     | 269 |
| HAO7397004.1   | 181 | .....                                                                                     | 270 |
| HAI3867277.1   | 181 | .....                                                                                     | 270 |
| HBA4320359.1   | 181 | .....                                                                                     | 270 |
| HAG9275443.1   | 181 | .....                                                                                     | 270 |
| HAX0142153.1   | 181 | .....                                                                                     | 270 |
| WP_155951915.1 | 181 | .....                                                                                     | 270 |
| WP_225390149.1 | 181 | .....                                                                                     | 270 |
| WP_217822457.1 | 181 | .....                                                                                     | 270 |
| FFP7778397.1   | 181 | .....                                                                                     | 270 |
| HAM6401014.1   | 181 | .....                                                                                     | 270 |
| WP_094316666.1 | 181 | .....                                                                                     | 270 |
| MBB0854235.1   | 181 | .....                                                                                     | 270 |
| NPP26331.1     | 181 | .....                                                                                     | 270 |
| WP_199351549.1 | 181 | .....                                                                                     | 270 |
| HBA1072022.1   | 181 | .....                                                                                     | 270 |
| OSP32553.1     | 185 | .....                                                                                     | 274 |
| HBD2267896.1   | 181 | .....                                                                                     | 270 |
| HAX7888640.1   | 181 | .....                                                                                     | 270 |

|                |     |             |     |
|----------------|-----|-------------|-----|
| HAL3865995.1   | 181 | .....E..... | 270 |
| HBA4313454.1   | 181 | .....       | 270 |
| WP_048228344.1 | 181 | .....       | 270 |
| HBM2060318.1   | 181 | .....       | 270 |
| HAI3750798.1   | 181 | .....       | 270 |
| HBC6041500.1   | 181 | .....       | 270 |
| MSI96964.1     | 181 | .....       | 270 |
| MBI9784956.1   | 181 | .....       | 270 |
| WP_181199831.1 | 181 | .....       | 270 |
| HBE4050048.1   | 181 | .....       | 270 |
| HBK1370968.1   | 181 | .....       | 270 |

Query range 4: 271 to 360

|                |     |                                                                                          |     |
|----------------|-----|------------------------------------------------------------------------------------------|-----|
| Query          | 271 | VLVGTTHGIASVNGDQLTWITKYNDKLVSELKDYSHKINLNGNVITIKNTDITLHQNNADTTGTQEKITKDKDIVFTNGGNLFDKNDL | 360 |
| WP_001034082.1 | 271 | .....                                                                                    | 360 |
| HAI6125783.1   | 271 | .....                                                                                    | 360 |
| WP_021579527.1 | 271 | .....                                                                                    | 360 |
| WP_142457960.1 | 271 | .....                                                                                    | 360 |
| EFK6366304.1   | 271 | .....                                                                                    | 360 |
| WP_114145544.1 | 271 | .....                                                                                    | 360 |
| HBJ6073103.1   | 271 | .....                                                                                    | 360 |
| WP_126896457.1 | 271 | .....                                                                                    | 360 |
| HAI1961408.1   | 271 | .....                                                                                    | 360 |
| WP_001034083.1 | 271 | .....                                                                                    | 360 |
| WP_001034084.1 | 271 | .....                                                                                    | 360 |
| AER85851.1     | 275 | .....                                                                                    | 364 |
| WP_033864944.1 | 271 | .....                                                                                    | 360 |
| EGD9592729.1   | 271 | .....                                                                                    | 360 |
| HAL2735930.1   | 271 | .....                                                                                    | 360 |
| WP_167580541.1 | 271 | .....                                                                                    | 360 |
| WP_128430364.1 | 271 | .....                                                                                    | 360 |
| HAL2502625.1   | 271 | .....                                                                                    | 360 |
| EHI3940979.1   | 271 | .....K.....                                                                              | 360 |
| WP_219054700.1 | 271 | .....                                                                                    | 360 |
| MBI9726529.1   | 271 | .....                                                                                    | 360 |
| HBB7276045.1   | 271 | .....                                                                                    | 360 |
| WP_001556799.1 | 271 | .....                                                                                    | 360 |
| HBC7568876.1   | 271 | .....                                                                                    | 360 |
| HAH4707744.1   | 271 | .....                                                                                    | 360 |
| WP_021525200.1 | 271 | .....                                                                                    | 360 |
| HBA1304970.1   | 271 | .....                                                                                    | 360 |
| WP_021545254.1 | 271 | .....                                                                                    | 360 |
| WP_113341376.1 | 271 | I.....                                                                                   | 360 |
| HAX8501378.1   | 271 | .....T.....                                                                              | 360 |
| HBC8781562.1   | 271 | .....F.....                                                                              | 360 |
| WP_049074636.1 | 271 | .....                                                                                    | 360 |
| WP_023150719.1 | 271 | .....                                                                                    | 360 |
| EYE09558.1     | 271 | .....                                                                                    | 360 |
| WP_021521406.1 | 271 | .....                                                                                    | 360 |
| MBB0498836.1   | 271 | .....                                                                                    | 360 |
| HAP0967861.1   | 271 | .....                                                                                    | 360 |
| WP_149846178.1 | 271 | .....                                                                                    | 360 |
| WP_060667427.1 | 271 | .....                                                                                    | 360 |
| HBI9439922.1   | 271 | .....                                                                                    | 360 |
| HBI7936509.1   | 271 | .....                                                                                    | 360 |
| WP_225394784.1 | 271 | .....                                                                                    | 360 |
| EHC2729660.1   | 271 | .....                                                                                    | 360 |
| HAI5392434.1   | 271 | .....                                                                                    | 360 |
| HAL3252735.1   | 271 | .....                                                                                    | 360 |
| WP_139837327.1 | 271 | .....                                                                                    | 360 |
| WP_053901632.1 | 271 | .....                                                                                    | 360 |
| HAI3750294.1   | 271 | .....K.....                                                                              | 360 |
| WP_113956116.1 | 271 | .....                                                                                    | 360 |
| HAY5190267.1   | 271 | .....                                                                                    | 360 |
| MBS8788038.1   | 271 | .....                                                                                    | 360 |
| WP_064232224.1 | 271 | .....                                                                                    | 360 |
| WP_118909407.1 | 271 | .....                                                                                    | 360 |
| WP_115766409.1 | 271 | .....                                                                                    | 360 |
| WP_001611046.1 | 271 | .....                                                                                    | 360 |
| HBC4963495.1   | 271 | .....                                                                                    | 360 |
| EFH8304360.1   | 271 | .....                                                                                    | 360 |
| HAN2555901.1   | 271 | .....                                                                                    | 360 |
| MBI9242867.1   | 271 | .....                                                                                    | 360 |
| HAM4370941.1   | 271 | .....L.....                                                                              | 360 |
| WP_059319927.1 | 271 | .....                                                                                    | 360 |
| WP_113495884.1 | 271 | .....E.....                                                                              | 360 |
| WP_116991798.1 | 271 | .....                                                                                    | 360 |
| WP_140402642.1 | 271 | .....                                                                                    | 360 |
| WP_169783511.1 | 271 | .....                                                                                    | 360 |
| EEY5188439.1   | 271 | .....                                                                                    | 360 |
| HAG7649195.1   | 271 | .....P.....                                                                              | 360 |
| HBB1193796.1   | 271 | .....                                                                                    | 360 |
| WP_181203932.1 | 271 | .....                                                                                    | 360 |
| HAH6736077.1   | 271 | .....                                                                                    | 360 |
| HAN3395805.1   | 270 | .....                                                                                    | 359 |
| HAO7397004.1   | 271 | .....                                                                                    | 360 |
| HAI3867277.1   | 271 | .....                                                                                    | 360 |
| HBA4320359.1   | 271 | .....                                                                                    | 360 |
| HAG9275443.1   | 271 | .....                                                                                    | 360 |
| HAX0142153.1   | 271 | .....                                                                                    | 360 |
| WP_155951915.1 | 271 | .....Y.....                                                                              | 360 |
| WP_225390149.1 | 271 | .....                                                                                    | 360 |
| WP_217822457.1 | 271 | .....                                                                                    | 360 |
| EFF7778397.1   | 271 | .....                                                                                    | 360 |
| HAM6401014.1   | 271 | .....                                                                                    | 360 |
| WP_094316666.1 | 271 | .....                                                                                    | 360 |
| MBB0854235.1   | 271 | .....                                                                                    | 360 |
| NPP26331.1     | 271 | .....N.....                                                                              | 360 |
| WP_199351549.1 | 271 | .....                                                                                    | 360 |
| HBA1072022.1   | 271 | .....                                                                                    | 360 |
| OSP32553.1     | 275 | .....                                                                                    | 364 |
| HBD2267896.1   | 271 | .....                                                                                    | 360 |
| HAX7888640.1   | 271 | .....                                                                                    | 360 |
| HAL3865995.1   | 271 | .....                                                                                    | 360 |
| HBA4313454.1   | 271 | .....                                                                                    | 360 |
| WP_048228344.1 | 271 | .....                                                                                    | 360 |
| HBM2060318.1   | 271 | .....                                                                                    | 360 |
| HAI3750798.1   | 271 | .....                                                                                    | 360 |
| HBC6041500.1   | 271 | .....                                                                                    | 360 |
| MSI96964.1     | 271 | .....                                                                                    | 360 |
| MBI9784956.1   | 271 | .....                                                                                    | 360 |
| WP_181199831.1 | 271 | .....V.....                                                                              | 360 |
| HBE4050048.1   | 271 | .....                                                                                    | 360 |
| HBK1370968.1   | 271 | .....                                                                                    | 360 |

Query range 5: 361 to 450

|                |     |                                                                                           |     |
|----------------|-----|-------------------------------------------------------------------------------------------|-----|
| Query          | 361 | FGSGGIIFDEGHEYNINGQGFVFKGAGIDIGKESIVNWNALYSSDDVLHKIGPGTLNVQKQGANIKIGEGNVILNEEGTFNNIYLASGN | 450 |
| WP_001034082.1 | 361 | .....                                                                                     | 450 |
| HAI6125783.1   | 361 | .....                                                                                     | 450 |
| WP_021579527.1 | 361 | .....                                                                                     | 450 |
| WP_142457960.1 | 361 | .....                                                                                     | 450 |
| EFK6366304.1   | 361 | .....                                                                                     | 450 |
| WP_114145544.1 | 361 | .....T.....                                                                               | 450 |
| HBJ6073103.1   | 361 | .....                                                                                     | 450 |

|                |     |             |     |
|----------------|-----|-------------|-----|
| WP_126896457.1 | 361 | .....       | 450 |
| HAI1961408.1   | 361 | .....       | 450 |
| WP_001034083.1 | 361 | .....       | 450 |
| WP_001034084.1 | 361 | .....       | 450 |
| AER85851.1     | 365 | .....       | 454 |
| WP_033864944.1 | 361 | .....       | 450 |
| EGD9592729.1   | 361 | .....R..... | 450 |
| HAL2735930.1   | 361 | .....       | 450 |
| WP_167580541.1 | 361 | .....       | 450 |
| WP_128430364.1 | 361 | .....       | 450 |
| HAL2502625.1   | 361 | .....R..... | 450 |
| EHI3940979.1   | 361 | .....       | 450 |
| WP_219054700.1 | 361 | .....       | 450 |
| MBI9726529.1   | 361 | .....       | 450 |
| HBB7276045.1   | 361 | .....       | 450 |
| WP_001556799.1 | 361 | .....       | 450 |
| HBC7568876.1   | 361 | .....       | 450 |
| HAH4707744.1   | 361 | .....       | 450 |
| WP_021525200.1 | 361 | .....       | 450 |
| HBA1304970.1   | 361 | .....       | 450 |
| WP_021545254.1 | 361 | .....       | 450 |
| WP_113341376.1 | 361 | .....       | 450 |
| HAX8501378.1   | 361 | .....       | 450 |
| HBC8781562.1   | 361 | .....       | 450 |
| WP_049074636.1 | 361 | .....       | 450 |
| WP_023150719.1 | 361 | .....       | 450 |
| EYE09558.1     | 361 | .....       | 450 |
| WP_021521406.1 | 361 | .....       | 450 |
| MBB0498836.1   | 361 | .....       | 450 |
| HAP0967861.1   | 361 | .....       | 450 |
| WP_149846178.1 | 361 | .....       | 450 |
| WP_060667427.1 | 361 | .....       | 450 |
| HBI9439922.1   | 361 | .....       | 450 |
| HBI7936509.1   | 361 | .....       | 450 |
| WP_225394784.1 | 361 | .....       | 450 |
| EHC2729660.1   | 361 | .....       | 450 |
| HAI5392434.1   | 361 | .....       | 450 |
| HAL3252735.1   | 361 | .....       | 450 |
| WP_139837327.1 | 361 | .....       | 450 |
| WP_053901632.1 | 361 | .....       | 450 |
| HAI3750294.1   | 361 | .....R..... | 450 |
| WP_113956116.1 | 361 | .....       | 450 |
| HAY5190267.1   | 361 | .....       | 450 |
| MBS8788038.1   | 361 | .....       | 450 |
| WP_064232224.1 | 361 | .....       | 450 |
| WP_118909407.1 | 361 | .....       | 450 |
| WP_115766409.1 | 361 | .....       | 450 |
| WP_001611046.1 | 361 | .....       | 450 |
| HBC4963495.1   | 361 | .....       | 450 |
| EFH8304360.1   | 361 | .....       | 450 |
| HAN2555901.1   | 361 | .....       | 450 |
| MBI9242867.1   | 361 | .....       | 450 |
| HAM4370941.1   | 361 | .....       | 450 |
| WP_059319927.1 | 361 | .....       | 450 |
| WP_113495884.1 | 361 | .....       | 450 |
| WP_116991798.1 | 361 | .....       | 450 |
| WP_140402642.1 | 361 | .....       | 450 |
| WP_169783511.1 | 361 | .....       | 450 |
| EEY5188439.1   | 361 | .....       | 450 |
| HAG7649195.1   | 361 | .....       | 450 |
| HBB1193796.1   | 361 | .....       | 450 |
| WP_181203932.1 | 361 | .....       | 450 |
| HAH6736077.1   | 361 | .....       | 450 |
| HAN3395805.1   | 360 | .....       | 449 |
| HAO7397004.1   | 361 | .....N..... | 450 |
| HAI3867277.1   | 361 | .....       | 450 |
| HBA4320359.1   | 361 | .....       | 450 |
| HAG9275443.1   | 361 | .....       | 450 |
| HAX0142153.1   | 361 | .....       | 450 |
| WP_155951915.1 | 361 | .....       | 450 |
| WP_225390149.1 | 361 | .....       | 450 |
| WP_217822457.1 | 361 | .....       | 450 |
| FFP7778397.1   | 361 | .....       | 450 |
| HAM6401014.1   | 361 | .....       | 450 |
| WP_094316666.1 | 361 | .....       | 450 |
| MBB0854235.1   | 361 | .....       | 450 |
| NPP26331.1     | 361 | .....       | 450 |
| WP_199351549.1 | 361 | .....       | 450 |
| HBA1072022.1   | 361 | .....       | 450 |
| OSP32553.1     | 365 | .....       | 454 |
| HBD2267896.1   | 361 | .....       | 450 |
| HAX7888640.1   | 361 | .....       | 450 |
| HAL3865995.1   | 361 | .....       | 450 |
| HBA4313454.1   | 361 | .....       | 450 |
| WP_048228344.1 | 361 | .....S..... | 450 |
| HBM2060318.1   | 361 | .....       | 450 |
| HAI3750798.1   | 361 | .....       | 450 |
| HBC6041500.1   | 361 | .....       | 450 |
| MSI96964.1     | 361 | .....       | 450 |
| MBI9784956.1   | 361 | .....       | 450 |
| WP_181199831.1 | 361 | .....       | 450 |
| HBE4050048.1   | 361 | .....       | 450 |
| HBK1370968.1   | 361 | .....       | 450 |

Query range 6: 451 to 540

|                |     |                                                                                           |     |
|----------------|-----|-------------------------------------------------------------------------------------------|-----|
| Query          | 451 | GKVLNKNDSLGNQYAGIFFTKRGGTLDLNGHNQFTFRIAATDDGTTITNSDTTKEAVLAINNEDSYIYHGNINGNIKLTHTNINSQDKK | 540 |
| WP_001034082.1 | 451 | .....                                                                                     | 540 |
| HAI6125783.1   | 451 | .....                                                                                     | 540 |
| WP_021579527.1 | 451 | .....                                                                                     | 540 |
| WP_142457960.1 | 451 | .....                                                                                     | 540 |
| EFK6366304.1   | 451 | .....                                                                                     | 540 |
| WP_114145544.1 | 451 | .....                                                                                     | 540 |
| HBJ6073103.1   | 451 | .....N.....                                                                               | 540 |
| WP_126896457.1 | 451 | .....                                                                                     | 540 |
| HAI1961408.1   | 451 | .....                                                                                     | 540 |
| WP_001034083.1 | 451 | .....                                                                                     | 540 |
| WP_001034084.1 | 451 | .....                                                                                     | 540 |
| AER85851.1     | 455 | .....                                                                                     | 544 |
| WP_033864944.1 | 451 | .....                                                                                     | 540 |
| EGD9592729.1   | 451 | .....                                                                                     | 540 |
| HAL2735930.1   | 451 | .....Y.....                                                                               | 540 |
| WP_167580541.1 | 451 | .....                                                                                     | 540 |
| WP_128430364.1 | 451 | .....                                                                                     | 540 |
| HAL2502625.1   | 451 | .....                                                                                     | 540 |
| EHI3940979.1   | 451 | .....                                                                                     | 540 |
| WP_219054700.1 | 451 | .....                                                                                     | 540 |
| MBI9726529.1   | 451 | .....                                                                                     | 540 |
| HBB7276045.1   | 451 | .....                                                                                     | 540 |
| WP_001556799.1 | 451 | .....                                                                                     | 540 |
| HBC7568876.1   | 451 | .....S.....                                                                               | 540 |
| HAH4707744.1   | 451 | .....                                                                                     | 540 |
| WP_021525200.1 | 451 | .....                                                                                     | 540 |
| HBA1304970.1   | 451 | .....                                                                                     | 540 |
| WP_021545254.1 | 451 | .....                                                                                     | 540 |
| WP_113341376.1 | 451 | .....                                                                                     | 540 |
| HAX8501378.1   | 451 | .....                                                                                     | 540 |
| HBC8781562.1   | 451 | .....                                                                                     | 540 |



|                |     |       |     |
|----------------|-----|-------|-----|
| WP_049074636.1 | 451 | ..... | 540 |
| WP_023150719.1 | 451 | ..... | 540 |
| EYE09558.1     | 451 | ..... | 540 |
| WP_021521406.1 | 451 | ..... | 540 |
| MBB0498836.1   | 451 | ..... | 540 |
| HAP0967861.1   | 451 | ..... | 540 |
| WP_149846178.1 | 451 | ..... | 540 |
| WP_060667427.1 | 451 | ..... | 540 |
| HBI9439922.1   | 451 | ..... | 540 |
| HBI7936509.1   | 451 | ..... | 540 |
| WP_225394784.1 | 451 | ..... | 540 |
| EHC2729660.1   | 451 | ..... | 540 |
| HAI5392434.1   | 451 | ..... | 540 |
| HAL3252735.1   | 451 | ..... | 540 |
| WP_139837327.1 | 451 | ..... | 540 |
| WP_053901632.1 | 451 | ..... | 540 |
| HAI3750294.1   | 451 | ..... | 540 |
| WP_113956116.1 | 451 | ..... | 540 |
| HAY5190267.1   | 451 | ..... | 540 |
| MBS8788038.1   | 451 | ..... | 540 |
| WP_064232224.1 | 451 | ..... | 540 |
| WP_118909407.1 | 451 | ..... | 540 |
| WP_115766409.1 | 451 | ..... | 540 |
| WP_001611046.1 | 451 | ..... | 540 |
| HBC4963495.1   | 451 | ..... | 540 |
| EFH8304360.1   | 451 | ..... | 540 |
| HAN2555901.1   | 451 | ..... | 540 |
| MBI9242867.1   | 451 | ..... | 540 |
| HAM4370941.1   | 451 | ..... | 540 |
| WP_059319927.1 | 451 | ..... | 540 |
| WP_113495884.1 | 451 | ..... | 540 |
| WP_116991798.1 | 451 | ..... | 540 |
| WP_140402642.1 | 451 | ..... | 540 |
| WP_169783511.1 | 451 | ..... | 540 |
| EEY5188439.1   | 451 | ..... | 540 |
| HAG7649195.1   | 451 | ..... | 540 |
| HBB1193796.1   | 451 | ..... | 540 |
| WP_181203932.1 | 451 | ..... | 540 |
| HAH6736077.1   | 451 | ..... | 540 |
| HAN3395805.1   | 450 | ..... | 539 |
| HAO7397004.1   | 451 | ..... | 540 |
| HAI3867277.1   | 451 | ..... | 540 |
| HBA4320359.1   | 451 | ..... | 540 |
| HAG9275443.1   | 451 | ..... | 540 |
| HAX0142153.1   | 451 | ..... | 540 |
| WP_155951915.1 | 451 | ..... | 540 |
| WP_225390149.1 | 451 | ..... | 540 |
| WP_217822457.1 | 451 | ..... | 540 |
| FFP7778397.1   | 451 | ..... | 540 |
| HAM6401014.1   | 451 | ..... | 540 |
| WP_094316666.1 | 451 | ..... | 540 |
| MBB0854235.1   | 451 | ..... | 540 |
| NPP26331.1     | 451 | ..... | 540 |
| WP_199351549.1 | 451 | ..... | 540 |
| HBA1072022.1   | 451 | ..... | 540 |
| OSP32553.1     | 455 | ..... | 544 |
| HBD2267896.1   | 451 | ..... | 540 |
| HAX7888640.1   | 451 | ..... | 540 |
| HAL3865995.1   | 451 | ..... | 540 |
| HBA4313454.1   | 451 | ..... | 540 |
| WP_048228344.1 | 451 | ..... | 540 |
| HBM2060318.1   | 451 | ..... | 540 |
| HAI3750798.1   | 451 | ..... | 540 |
| HBC6041500.1   | 451 | ..... | 540 |
| MSI96964.1     | 451 | ..... | 540 |
| MBI9784956.1   | 451 | ..... | 540 |
| WP_181199831.1 | 451 | ..... | 540 |
| HBE4050048.1   | 451 | ..... | 540 |
| HBK1370968.1   | 451 | ..... | 540 |

Query range 7: 541 to 630

|                |     |       |     |
|----------------|-----|-------|-----|
| Query          | 541 | ..... | 630 |
| WP_001034082.1 | 541 | ..... | 630 |
| HAI6125783.1   | 541 | ..... | 630 |
| WP_021579527.1 | 541 | ..... | 630 |
| WP_142457960.1 | 541 | ..... | 630 |
| EFK6366304.1   | 541 | ..... | 630 |
| WP_114145544.1 | 541 | ..... | 630 |
| HBJ6073103.1   | 541 | ..... | 630 |
| WP_126896457.1 | 541 | ..... | 630 |
| HAI1961408.1   | 541 | ..... | 630 |
| WP_001034083.1 | 541 | ..... | 630 |
| WP_001034084.1 | 541 | ..... | 630 |
| AER85851.1     | 545 | ..... | 634 |
| WP_033864944.1 | 541 | ..... | 630 |
| EGD9592729.1   | 541 | ..... | 630 |
| HAL2735930.1   | 541 | ..... | 630 |
| WP_167580541.1 | 541 | ..... | 630 |
| WP_128430364.1 | 541 | ..... | 630 |
| HAL2502625.1   | 541 | ..... | 630 |
| EHI3940979.1   | 541 | ..... | 630 |
| WP_219054700.1 | 541 | ..... | 630 |
| MBI9726529.1   | 541 | ..... | 630 |
| HBB7276045.1   | 541 | ..... | 630 |
| WP_001556799.1 | 541 | ..... | 630 |
| HBC7568876.1   | 541 | ..... | 630 |
| HAH4707744.1   | 541 | ..... | 630 |
| WP_021525200.1 | 541 | ..... | 630 |
| HBA1304970.1   | 541 | ..... | 630 |
| WP_021545254.1 | 541 | ..... | 630 |
| WP_113341376.1 | 541 | ..... | 630 |
| HAX8501378.1   | 541 | ..... | 630 |
| HBC8781562.1   | 541 | ..... | 630 |
| WP_049074636.1 | 541 | ..... | 630 |
| WP_023150719.1 | 541 | ..... | 630 |
| EYE09558.1     | 541 | ..... | 630 |
| WP_021521406.1 | 541 | ..... | 630 |
| MBB0498836.1   | 541 | ..... | 630 |
| HAP0967861.1   | 541 | ..... | 630 |
| WP_149846178.1 | 541 | ..... | 630 |
| WP_060667427.1 | 541 | ..... | 630 |
| HBI9439922.1   | 541 | ..... | 630 |
| HBI7936509.1   | 541 | ..... | 630 |
| WP_225394784.1 | 541 | ..... | 630 |
| EHC2729660.1   | 541 | ..... | 630 |
| HAI5392434.1   | 541 | ..... | 630 |
| HAL3252735.1   | 541 | ..... | 630 |
| WP_139837327.1 | 541 | ..... | 630 |
| WP_053901632.1 | 541 | ..... | 630 |
| HAI3750294.1   | 541 | ..... | 630 |
| WP_113956116.1 | 541 | ..... | 630 |
| HAY5190267.1   | 541 | ..... | 630 |
| MBS8788038.1   | 541 | ..... | 630 |
| WP_064232224.1 | 541 | ..... | 630 |
| WP_118909407.1 | 541 | ..... | 630 |
| WP_115766409.1 | 541 | ..... | 630 |
| WP_001611046.1 | 541 | ..... | 630 |

|                |     |       |     |
|----------------|-----|-------|-----|
| HBC4963495.1   | 541 | ..... | 630 |
| EFH8304360.1   | 541 | ..... | 630 |
| HAN2555901.1   | 541 | ..... | 630 |
| MBI9242867.1   | 541 | ..... | 630 |
| HAM4370941.1   | 541 | ..... | 630 |
| WP_059319927.1 | 541 | ..... | 630 |
| WP_113495884.1 | 541 | ..... | 630 |
| WP_116991798.1 | 541 | ..... | 630 |
| WP_140402642.1 | 541 | ..... | 630 |
| WP_169783511.1 | 541 | ..... | 630 |
| EEY5188439.1   | 541 | ..... | 630 |
| HAG7649195.1   | 541 | ..... | 630 |
| HBB1193796.1   | 541 | ..... | 630 |
| WP_181203932.1 | 541 | ..... | 630 |
| HAH6736077.1   | 541 | ..... | 630 |
| HAN3395805.1   | 540 | ..... | 629 |
| HAO7397004.1   | 541 | ..... | 630 |
| HAI3867277.1   | 541 | ..... | 630 |
| HBA4320359.1   | 541 | ..... | 630 |
| HAG9275443.1   | 541 | ..... | 630 |
| HAX0142153.1   | 541 | ..... | 630 |
| WP_155951915.1 | 541 | ..... | 630 |
| WP_225390149.1 | 541 | ..... | 630 |
| WP_217822457.1 | 541 | ..... | 630 |
| FFP7778397.1   | 541 | ..... | 630 |
| HAM6401014.1   | 541 | ..... | 630 |
| WP_094316666.1 | 541 | ..... | 630 |
| MBB0854235.1   | 541 | ..... | 630 |
| NPP26331.1     | 541 | ..... | 630 |
| WP_199351549.1 | 541 | ..... | 630 |
| HBA1072022.1   | 541 | ..... | 630 |
| OSP32553.1     | 545 | ..... | 634 |
| HBD2267896.1   | 541 | ..... | 630 |
| HAX7888640.1   | 541 | ..... | 630 |
| HAL3865995.1   | 541 | ..... | 630 |
| HBA4313454.1   | 541 | ..... | 630 |
| WP_048228344.1 | 541 | ..... | 630 |
| HBM2060318.1   | 541 | ..... | 630 |
| HAI3750798.1   | 541 | ..... | 630 |
| HBC6041500.1   | 541 | ..... | 630 |
| MSI96964.1     | 541 | ..... | 630 |
| MBI9784956.1   | 541 | ..... | 630 |
| WP_181199831.1 | 541 | ..... | 630 |
| HBE4050048.1   | 541 | ..... | 630 |
| HBK1370968.1   | 541 | ..... | 630 |

Query range 8: 631 to 720

|                |     |                                                                                            |     |
|----------------|-----|--------------------------------------------------------------------------------------------|-----|
| Query          | 631 | FKFDTLHLNNADFSISRNVANVEGNISANKSAITIGDKNAYIDNLGKNITNNGFDFKQTISTNLSIGETKFTGGITAHNSQIAIGDQAVV | 720 |
| WP_001034082.1 | 631 | .....                                                                                      | 720 |
| HAI6125783.1   | 631 | .....                                                                                      | 720 |
| WP_021579527.1 | 631 | .....                                                                                      | 720 |
| WP_142457960.1 | 631 | .....                                                                                      | 720 |
| EFK6366304.1   | 631 | .....                                                                                      | 720 |
| WP_114145544.1 | 631 | .....                                                                                      | 720 |
| HBJ6073103.1   | 631 | .....                                                                                      | 720 |
| WP_126896457.1 | 631 | .....                                                                                      | 720 |
| HAI1961408.1   | 631 | .....                                                                                      | 720 |
| WP_001034083.1 | 631 | .....                                                                                      | 720 |
| WP_001034084.1 | 631 | .....                                                                                      | 720 |
| AER85851.1     | 635 | .....                                                                                      | 724 |
| WP_033864944.1 | 631 | .....                                                                                      | 720 |
| EGD9592729.1   | 631 | .....                                                                                      | 720 |
| HAL2735930.1   | 631 | .....                                                                                      | 720 |
| WP_167580541.1 | 631 | .....                                                                                      | 720 |
| WP_128430364.1 | 631 | .....                                                                                      | 720 |
| HAL2502625.1   | 631 | .....                                                                                      | 720 |
| EHI3940979.1   | 631 | .....                                                                                      | 720 |
| WP_219054700.1 | 631 | .....                                                                                      | 720 |
| MBI9726529.1   | 631 | .....                                                                                      | 720 |
| HBB7276045.1   | 631 | .....                                                                                      | 720 |
| WP_001556799.1 | 631 | .....                                                                                      | 720 |
| HBC7568876.1   | 631 | .....                                                                                      | 720 |
| HAH4707744.1   | 631 | .....                                                                                      | 720 |
| WP_021525200.1 | 631 | .....                                                                                      | 720 |
| HBA1304970.1   | 631 | .....                                                                                      | 720 |
| WP_021545254.1 | 631 | .....                                                                                      | 720 |
| WP_113341376.1 | 631 | .....                                                                                      | 720 |
| HAX8501378.1   | 631 | .....                                                                                      | 720 |
| HBC8781562.1   | 631 | .....                                                                                      | 720 |
| WP_049074636.1 | 631 | .....                                                                                      | 720 |
| WP_023150719.1 | 631 | .....                                                                                      | 720 |
| EYE09558.1     | 631 | .....                                                                                      | 720 |
| WP_021521406.1 | 631 | .....                                                                                      | 720 |
| MBB0498836.1   | 631 | .....                                                                                      | 720 |
| HAP0967861.1   | 631 | .....                                                                                      | 720 |
| WP_149846178.1 | 631 | .....                                                                                      | 720 |
| WP_060667427.1 | 631 | .....                                                                                      | 720 |
| HBI9439922.1   | 631 | .....                                                                                      | 720 |
| HBI7936509.1   | 631 | .....                                                                                      | 720 |
| WP_225394784.1 | 631 | .....                                                                                      | 720 |
| EHC2729660.1   | 631 | .....                                                                                      | 720 |
| HAI5392434.1   | 631 | .....                                                                                      | 720 |
| HAL3252735.1   | 631 | .....                                                                                      | 720 |
| WP_139837327.1 | 631 | .....                                                                                      | 720 |
| WP_053901632.1 | 631 | .....                                                                                      | 720 |
| HAI3750294.1   | 631 | .....                                                                                      | 720 |
| WP_113956116.1 | 631 | .....                                                                                      | 720 |
| HAY5190267.1   | 631 | .....                                                                                      | 720 |
| MBS8788038.1   | 631 | .....                                                                                      | 720 |
| WP_064232224.1 | 631 | .....                                                                                      | 720 |
| WP_118909407.1 | 631 | .....                                                                                      | 720 |
| WP_115766409.1 | 631 | .....                                                                                      | 720 |
| WP_001611046.1 | 631 | .....                                                                                      | 720 |
| HBC4963495.1   | 631 | .....                                                                                      | 720 |
| EFH8304360.1   | 631 | .....                                                                                      | 720 |
| HAN2555901.1   | 631 | .....                                                                                      | 720 |
| MBI9242867.1   | 631 | .....                                                                                      | 720 |
| HAM4370941.1   | 631 | .....                                                                                      | 720 |
| WP_059319927.1 | 631 | .....                                                                                      | 720 |
| WP_113495884.1 | 631 | .....                                                                                      | 720 |
| WP_116991798.1 | 631 | .....                                                                                      | 720 |
| WP_140402642.1 | 631 | .....                                                                                      | 720 |
| WP_169783511.1 | 631 | .....                                                                                      | 720 |
| EEY5188439.1   | 631 | .....                                                                                      | 720 |
| HAG7649195.1   | 631 | .....                                                                                      | 720 |
| HBB1193796.1   | 631 | .....                                                                                      | 720 |
| WP_181203932.1 | 631 | .....                                                                                      | 720 |
| HAH6736077.1   | 631 | .....                                                                                      | 720 |
| HAN3395805.1   | 630 | .....                                                                                      | 719 |
| HAO7397004.1   | 631 | .....                                                                                      | 720 |
| HAI3867277.1   | 631 | .....                                                                                      | 720 |
| HBA4320359.1   | 631 | .....                                                                                      | 720 |
| HAG9275443.1   | 631 | .....                                                                                      | 720 |
| HAX0142153.1   | 631 | .....                                                                                      | 720 |
| WP_155951915.1 | 631 | .....                                                                                      | 720 |
| WP_225390149.1 | 631 | .....                                                                                      | 720 |
| WP_217822457.1 | 631 | .....                                                                                      | 720 |

|                |     |       |     |
|----------------|-----|-------|-----|
| FFP7778397.1   | 631 | ..... | 720 |
| HAM6401014.1   | 631 | ..... | 720 |
| WP_094316666.1 | 631 | ..... | 720 |
| MBB0854235.1   | 631 | ..... | 720 |
| NPP26331.1     | 631 | ..... | 720 |
| WP_199351549.1 | 631 | ..... | 720 |
| HBA1072022.1   | 631 | ..... | 720 |
| OSP32553.1     | 635 | ..... | 724 |
| HBD2267896.1   | 631 | ..... | 720 |
| HAX7888640.1   | 631 | ..... | 720 |
| HAL3865995.1   | 631 | ..... | 720 |
| HBA4313454.1   | 631 | ..... | 720 |
| WP_048228344.1 | 631 | ..... | 720 |
| HBM2060318.1   | 631 | ..... | 720 |
| HAI3750798.1   | 631 | ..... | 720 |
| HBC6041500.1   | 631 | ..... | 720 |
| MSI96964.1     | 631 | ..... | 720 |
| MBI9784956.1   | 631 | ..... | 720 |
| WP_181199831.1 | 631 | ..... | 720 |
| HBE4050048.1   | 631 | ..... | 720 |
| HBK1370968.1   | 631 | ..... | 720 |

Query range 9: 721 to 810

|                |     |                                                                                            |     |
|----------------|-----|--------------------------------------------------------------------------------------------|-----|
| Query          | 721 | TLNGATFLNNTPISIDKGAKVIAQNSMFTTKGIDISGELTMMGIPEQNSKTVTPGLHYAADGFRLSGGNANFIARNMASVTGNIIYADAA | 810 |
| WP_001034082.1 | 721 | .....                                                                                      | 810 |
| HAI6125783.1   | 721 | .....                                                                                      | 810 |
| WP_021579527.1 | 721 | .....                                                                                      | 810 |
| WP_142457960.1 | 721 | .....                                                                                      | 810 |
| EFK6366304.1   | 721 | .....                                                                                      | 810 |
| WP_114145544.1 | 721 | .....                                                                                      | 810 |
| HBJ6073103.1   | 721 | .....                                                                                      | 810 |
| WP_126896457.1 | 721 | .....                                                                                      | 810 |
| HAI1961408.1   | 721 | .....                                                                                      | 810 |
| WP_001034083.1 | 721 | .....                                                                                      | 810 |
| WP_001034084.1 | 721 | .....                                                                                      | 810 |
| AER85851.1     | 725 | .....                                                                                      | 814 |
| WP_033864944.1 | 721 | .....                                                                                      | 810 |
| EGD9592729.1   | 721 | .....                                                                                      | 810 |
| HAL2735930.1   | 721 | .....                                                                                      | 810 |
| WP_167580541.1 | 721 | .....                                                                                      | 810 |
| WP_128430364.1 | 721 | .....                                                                                      | 810 |
| HAL2502625.1   | 721 | .....                                                                                      | 810 |
| EHI3940979.1   | 721 | .....                                                                                      | 810 |
| WP_219054700.1 | 721 | .....                                                                                      | 810 |
| MBI9726529.1   | 721 | .....                                                                                      | 810 |
| HBB7276045.1   | 721 | .....                                                                                      | 810 |
| WP_001556799.1 | 721 | .....                                                                                      | 810 |
| HBC7568876.1   | 721 | .....                                                                                      | 810 |
| HAH4707744.1   | 721 | .....                                                                                      | 810 |
| WP_021525200.1 | 721 | .....                                                                                      | 810 |
| HBA1304970.1   | 721 | .....                                                                                      | 810 |
| WP_021545254.1 | 721 | .....                                                                                      | 810 |
| WP_113341376.1 | 721 | .....                                                                                      | 810 |
| HAX8501378.1   | 721 | .....                                                                                      | 810 |
| HBC8781562.1   | 721 | .....                                                                                      | 810 |
| WP_049074636.1 | 721 | .....                                                                                      | 810 |
| WP_023150719.1 | 721 | .....                                                                                      | 810 |
| EYE09558.1     | 721 | .....                                                                                      | 810 |
| WP_021521406.1 | 721 | .....                                                                                      | 810 |
| MBB0498836.1   | 721 | .....                                                                                      | 810 |
| HAP0967861.1   | 721 | .....                                                                                      | 810 |
| WP_149846178.1 | 721 | .....                                                                                      | 810 |
| WP_060667427.1 | 721 | .....                                                                                      | 810 |
| HBI9439922.1   | 721 | .....                                                                                      | 810 |
| HBI7936509.1   | 721 | .....                                                                                      | 810 |
| WP_225394784.1 | 721 | .....                                                                                      | 810 |
| EHC2729660.1   | 721 | .....                                                                                      | 810 |
| HAI5392434.1   | 721 | .....                                                                                      | 810 |
| HAL3252735.1   | 721 | .....                                                                                      | 810 |
| WP_139837327.1 | 721 | .....                                                                                      | 810 |
| WP_053901632.1 | 721 | .....                                                                                      | 810 |
| HAI3750294.1   | 721 | .....                                                                                      | 810 |
| WP_113956116.1 | 721 | .....                                                                                      | 810 |
| HAY5190267.1   | 721 | .....                                                                                      | 810 |
| MBS8788038.1   | 721 | .....                                                                                      | 810 |
| WP_064232224.1 | 721 | .....                                                                                      | 810 |
| WP_118909407.1 | 721 | .....                                                                                      | 810 |
| WP_115766409.1 | 721 | .....                                                                                      | 810 |
| WP_001611046.1 | 721 | .....                                                                                      | 810 |
| HBC4963495.1   | 721 | .....                                                                                      | 810 |
| EFH8304360.1   | 721 | .....                                                                                      | 810 |
| HAN2555901.1   | 721 | .....                                                                                      | 810 |
| MBI9242867.1   | 721 | .....                                                                                      | 810 |
| HAM4370941.1   | 721 | .....                                                                                      | 810 |
| WP_059319927.1 | 721 | .....                                                                                      | 810 |
| WP_113495884.1 | 721 | .....                                                                                      | 810 |
| WP_116991798.1 | 721 | .....                                                                                      | 810 |
| WP_140402642.1 | 721 | .....                                                                                      | 810 |
| WP_169783511.1 | 721 | .....                                                                                      | 810 |
| EY5188439.1    | 721 | .....                                                                                      | 810 |
| HAG7649195.1   | 721 | .....                                                                                      | 810 |
| HBB1193796.1   | 721 | .....                                                                                      | 810 |
| WP_181203932.1 | 721 | .....                                                                                      | 810 |
| HAH6736077.1   | 721 | .....                                                                                      | 810 |
| HAN3395805.1   | 720 | .....                                                                                      | 809 |
| HAO7397004.1   | 721 | .....                                                                                      | 810 |
| HAI3867277.1   | 721 | .....                                                                                      | 810 |
| HBA4320359.1   | 721 | .....                                                                                      | 810 |
| HAG9275443.1   | 721 | .....                                                                                      | 810 |
| HAX0142153.1   | 721 | .....                                                                                      | 810 |
| WP_155951915.1 | 721 | .....                                                                                      | 810 |
| WP_225390149.1 | 721 | .....                                                                                      | 810 |
| WP_217822457.1 | 721 | .....                                                                                      | 810 |
| FFP7778397.1   | 721 | .....                                                                                      | 810 |
| HAM6401014.1   | 721 | .....                                                                                      | 810 |
| WP_094316666.1 | 721 | .....                                                                                      | 810 |
| MBB0854235.1   | 721 | .....                                                                                      | 810 |
| NPP26331.1     | 721 | .....                                                                                      | 810 |
| WP_199351549.1 | 721 | .....                                                                                      | 810 |
| HBA1072022.1   | 721 | .....                                                                                      | 810 |
| OSP32553.1     | 725 | .....                                                                                      | 814 |
| HBD2267896.1   | 721 | .....                                                                                      | 810 |
| HAX7888640.1   | 721 | .....                                                                                      | 810 |
| HAL3865995.1   | 721 | .....                                                                                      | 810 |
| HBA4313454.1   | 721 | .....                                                                                      | 810 |
| WP_048228344.1 | 721 | .....                                                                                      | 810 |
| HBM2060318.1   | 721 | .....                                                                                      | 810 |
| HAI3750798.1   | 721 | .....                                                                                      | 810 |
| HBC6041500.1   | 721 | .....                                                                                      | 810 |
| MSI96964.1     | 721 | .....                                                                                      | 810 |
| MBI9784956.1   | 721 | .....                                                                                      | 810 |
| WP_181199831.1 | 721 | .....                                                                                      | 810 |
| HBE4050048.1   | 721 | .....                                                                                      | 810 |
| HBK1370968.1   | 721 | .....                                                                                      | 810 |

Query range 10: 811 to 900

|                |     |                                                                                          |     |
|----------------|-----|------------------------------------------------------------------------------------------|-----|
| Query          | 811 | TITLQPETETPTISSAYQAWAETLLYGFDYAYRGAITAPKATVSMNNAIWLNSQSSINRLETKDSMVRFTGDNGKFTTLTVDNLTIDD | 900 |
| WP_001034082.1 | 811 | .....                                                                                    | 900 |
| HAI6125783.1   | 811 | .....                                                                                    | 900 |
| WP_021579527.1 | 811 | .....                                                                                    | 900 |
| WP_142457960.1 | 811 | .....                                                                                    | 900 |
| EFK6366304.1   | 811 | .....                                                                                    | 900 |
| WP_114145544.1 | 811 | .....                                                                                    | 900 |
| HBJ6073103.1   | 811 | .....                                                                                    | 900 |
| WP_126896457.1 | 811 | .....                                                                                    | 900 |
| HAI1961408.1   | 811 | .....                                                                                    | 900 |
| WP_001034083.1 | 811 | .....                                                                                    | 900 |
| WP_001034084.1 | 811 | .....                                                                                    | 900 |
| AER85851.1     | 815 | .....                                                                                    | 904 |
| WP_033864944.1 | 811 | .....                                                                                    | 900 |
| EGD9592729.1   | 811 | .....                                                                                    | 900 |
| HAL2735930.1   | 811 | .....                                                                                    | 900 |
| WP_167580541.1 | 811 | .....                                                                                    | 900 |
| WP_128430364.1 | 811 | .....                                                                                    | 900 |
| HAL2502625.1   | 811 | .....                                                                                    | 900 |
| EHI3940979.1   | 811 | .....                                                                                    | 900 |
| WP_219054700.1 | 811 | .....                                                                                    | 900 |
| MBI9726529.1   | 811 | .....                                                                                    | 900 |
| HBB7276045.1   | 811 | .....                                                                                    | 900 |
| WP_001556799.1 | 811 | .....                                                                                    | 900 |
| HBC7568876.1   | 811 | .....                                                                                    | 900 |
| HAH4707744.1   | 811 | .....                                                                                    | 900 |
| WP_021525200.1 | 811 | .....                                                                                    | 900 |
| HBA1304970.1   | 811 | .....                                                                                    | 900 |
| WP_021545254.1 | 811 | .....                                                                                    | 900 |
| WP_113341376.1 | 811 | .....                                                                                    | 900 |
| HAX8501378.1   | 811 | .....                                                                                    | 900 |
| HBC8781562.1   | 811 | .....                                                                                    | 900 |
| WP_049074636.1 | 811 | .....                                                                                    | 900 |
| WP_023150719.1 | 811 | .....                                                                                    | 900 |
| EYE09558.1     | 811 | .....                                                                                    | 900 |
| WP_021521406.1 | 811 | .....                                                                                    | 900 |
| MBB0498836.1   | 811 | .....                                                                                    | 900 |
| HAP0967861.1   | 811 | .....                                                                                    | 900 |
| WP_149846178.1 | 811 | .....                                                                                    | 900 |
| WP_060667427.1 | 811 | .....                                                                                    | 900 |
| HBI9439922.1   | 811 | .....                                                                                    | 900 |
| HBI7936509.1   | 811 | .....                                                                                    | 900 |
| WP_225394784.1 | 811 | .....                                                                                    | 900 |
| EHC2729660.1   | 811 | .....                                                                                    | 900 |
| HAI5392434.1   | 811 | .....                                                                                    | 900 |
| HAL3252735.1   | 811 | .....                                                                                    | 900 |
| WP_139837327.1 | 811 | .....                                                                                    | 900 |
| WP_053901632.1 | 811 | .....                                                                                    | 900 |
| HAI3750294.1   | 811 | .....                                                                                    | 900 |
| WP_113956116.1 | 811 | .....                                                                                    | 900 |
| HAY5190267.1   | 811 | .....                                                                                    | 900 |
| MBS8788038.1   | 811 | .....                                                                                    | 900 |
| WP_064232224.1 | 811 | .....                                                                                    | 900 |
| WP_118909407.1 | 811 | .....                                                                                    | 900 |
| WP_115766409.1 | 811 | .....                                                                                    | 900 |
| WP_001611046.1 | 811 | .....                                                                                    | 900 |
| HBC4963495.1   | 811 | .....                                                                                    | 900 |
| EFH8304360.1   | 811 | .....                                                                                    | 900 |
| HAN2555901.1   | 811 | .....                                                                                    | 900 |
| MBI9242867.1   | 811 | .....                                                                                    | 900 |
| HAM4370941.1   | 811 | .....                                                                                    | 900 |
| WP_059319927.1 | 811 | .....                                                                                    | 900 |
| WP_113495884.1 | 811 | .....                                                                                    | 900 |
| WP_116991798.1 | 811 | .....                                                                                    | 900 |
| WP_140402642.1 | 811 | .....                                                                                    | 900 |
| WP_169783511.1 | 811 | .....                                                                                    | 900 |
| EEY5188439.1   | 811 | .....                                                                                    | 900 |
| HAG7649195.1   | 811 | .....                                                                                    | 900 |
| HBB1193796.1   | 811 | .....                                                                                    | 900 |
| WP_181203932.1 | 811 | .....                                                                                    | 900 |
| HAH6736077.1   | 811 | .....                                                                                    | 900 |
| HAN3395805.1   | 810 | .....                                                                                    | 899 |
| HAO7397004.1   | 811 | .....                                                                                    | 900 |
| HAI3867277.1   | 811 | .....                                                                                    | 900 |
| HBA4320359.1   | 811 | .....                                                                                    | 900 |
| HAG9275443.1   | 811 | .....                                                                                    | 900 |
| HAX0142153.1   | 811 | .....                                                                                    | 900 |
| WP_155951915.1 | 811 | .....                                                                                    | 900 |
| WP_225390149.1 | 811 | .....                                                                                    | 900 |
| WP_217822457.1 | 811 | .....                                                                                    | 900 |
| FFP7778397.1   | 811 | .....                                                                                    | 900 |
| HAM6401014.1   | 811 | .....                                                                                    | 900 |
| WP_094316666.1 | 811 | .....                                                                                    | 900 |
| MBB0854235.1   | 811 | .....                                                                                    | 900 |
| NPP26331.1     | 811 | .....                                                                                    | 900 |
| WP_199351549.1 | 811 | .....                                                                                    | 900 |
| HBA1072022.1   | 811 | .....                                                                                    | 900 |
| OSP32553.1     | 815 | .....                                                                                    | 904 |
| HBD2267896.1   | 811 | .....                                                                                    | 900 |
| HAX7888640.1   | 811 | .....                                                                                    | 900 |
| HAL3865995.1   | 811 | .....                                                                                    | 900 |
| HBA4313454.1   | 811 | .....                                                                                    | 900 |
| WP_048228344.1 | 811 | .....                                                                                    | 900 |
| HBM2060318.1   | 811 | .....                                                                                    | 900 |
| HAI3750798.1   | 811 | .....                                                                                    | 900 |
| HBC6041500.1   | 811 | .....                                                                                    | 900 |
| MSI96964.1     | 811 | .....                                                                                    | 900 |
| MBI9784956.1   | 811 | .....                                                                                    | 900 |
| WP_181199831.1 | 811 | .....                                                                                    | 900 |
| HBE4050048.1   | 811 | .....                                                                                    | 900 |
| HBK1370968.1   | 811 | .....                                                                                    | 900 |

Query range 11: 901 to 990

|                |     |                                                                                           |     |
|----------------|-----|-------------------------------------------------------------------------------------------|-----|
| Query          | 901 | SAFVLRLANLAQADQLVNVKLSLGNKLLLVDFIEKNGNSNGLNIDLVSAPKGTAVDVFKATTRSIGFSDVTPVIEQKNDTKATWTLIGY | 990 |
| WP_001034082.1 | 901 | .....                                                                                     | 990 |
| HAI6125783.1   | 901 | .....                                                                                     | 990 |
| WP_021579527.1 | 901 | .....                                                                                     | 990 |
| WP_142457960.1 | 901 | .....                                                                                     | 990 |
| EFK6366304.1   | 901 | .....                                                                                     | 990 |
| WP_114145544.1 | 901 | .....                                                                                     | 990 |
| HBJ6073103.1   | 901 | .....                                                                                     | 990 |
| WP_126896457.1 | 901 | .....                                                                                     | 990 |
| HAI1961408.1   | 901 | .....                                                                                     | 990 |
| WP_001034083.1 | 901 | .....                                                                                     | 990 |
| WP_001034084.1 | 901 | .....                                                                                     | 990 |
| AER85851.1     | 905 | .....                                                                                     | 994 |
| WP_033864944.1 | 901 | .....                                                                                     | 990 |
| EGD9592729.1   | 901 | .....                                                                                     | 990 |
| HAL2735930.1   | 901 | .....                                                                                     | 990 |
| WP_167580541.1 | 901 | .....                                                                                     | 990 |
| WP_128430364.1 | 901 | .....                                                                                     | 990 |
| HAL2502625.1   | 901 | .....                                                                                     | 990 |
| EHI3940979.1   | 901 | .....                                                                                     | 990 |
| WP_219054700.1 | 901 | .....                                                                                     | 990 |
| MBI9726529.1   | 901 | .....                                                                                     | 990 |

|                |     |        |     |
|----------------|-----|--------|-----|
| HBB7276045.1   | 901 | .....  | 990 |
| WP_001556799.1 | 901 | .....  | 990 |
| HBC7568876.1   | 901 | .....  | 990 |
| HAH4707744.1   | 901 | .....  | 990 |
| WP_021525200.1 | 901 | .....  | 990 |
| HBA1304970.1   | 901 | C..... | 990 |
| WP_021545254.1 | 901 | .....  | 990 |
| WP_113341376.1 | 901 | .....  | 990 |
| HAX8501378.1   | 901 | .....  | 990 |
| HBC8781562.1   | 901 | .....  | 990 |
| WP_049074636.1 | 901 | .....  | 990 |
| WP_023150719.1 | 901 | .....  | 990 |
| EYE09558.1     | 901 | .....  | 990 |
| WP_021521406.1 | 901 | .....  | 990 |
| MBB0498836.1   | 901 | .....  | 990 |
| HAP0967861.1   | 901 | .....  | 990 |
| WP_149846178.1 | 901 | .....  | 990 |
| WP_060667427.1 | 901 | .....  | 990 |
| HBI9439922.1   | 901 | .....  | 990 |
| HBI7936509.1   | 901 | .....  | 990 |
| WP_225394784.1 | 901 | .....  | 990 |
| EHC2729660.1   | 901 | .....  | 990 |
| HAI5392434.1   | 901 | .....  | 990 |
| HAL3252735.1   | 901 | .....  | 990 |
| WP_139837327.1 | 901 | .....  | 990 |
| WP_053901632.1 | 901 | .....  | 990 |
| HAI3750294.1   | 901 | .....  | 990 |
| WP_113956116.1 | 901 | .....  | 990 |
| HAY5190267.1   | 901 | .....  | 990 |
| MBS8788038.1   | 901 | .....  | 990 |
| WP_064232224.1 | 901 | .....  | 990 |
| WP_118909407.1 | 901 | .....  | 990 |
| WP_115766409.1 | 901 | .....  | 990 |
| WP_001611046.1 | 901 | .....  | 990 |
| HBC4963495.1   | 901 | .....  | 990 |
| EFH8304360.1   | 901 | .....  | 990 |
| HAN2555901.1   | 901 | .....  | 990 |
| MBI9242867.1   | 901 | .....  | 990 |
| HAM4370941.1   | 901 | .....  | 990 |
| WP_059319927.1 | 901 | .....  | 990 |
| WP_113495884.1 | 901 | .....  | 990 |
| WP_116991798.1 | 901 | .....  | 990 |
| WP_140402642.1 | 901 | .....  | 990 |
| WP_169783511.1 | 901 | .....  | 990 |
| EEY5188439.1   | 901 | .....  | 990 |
| HAG7649195.1   | 901 | .....  | 990 |
| HBB1193796.1   | 901 | .....  | 990 |
| WP_181203932.1 | 901 | .....  | 990 |
| HAH6736077.1   | 901 | .....  | 990 |
| HAN3395805.1   | 900 | .....  | 989 |
| HAO7397004.1   | 901 | .....  | 990 |
| HAI3867277.1   | 901 | .....  | 990 |
| HBA4320359.1   | 901 | .....  | 990 |
| HAG9275443.1   | 901 | .....  | 990 |
| HAX0142153.1   | 901 | .....  | 990 |
| WP_155951915.1 | 901 | .....  | 990 |
| WP_225390149.1 | 901 | .....  | 990 |
| WP_217822457.1 | 901 | .....  | 990 |
| FFP7778397.1   | 901 | .....  | 990 |
| HAM6401014.1   | 901 | .....  | 990 |
| WP_094316666.1 | 901 | .....  | 990 |
| MBB0854235.1   | 901 | .....  | 990 |
| NPP26331.1     | 901 | .....  | 990 |
| WP_199351549.1 | 901 | .....  | 990 |
| HBA1072022.1   | 901 | .....  | 990 |
| OSP32553.1     | 905 | .....  | 994 |
| HBD2267896.1   | 901 | .....  | 990 |
| HAX7888640.1   | 901 | .....  | 990 |
| HAL3865995.1   | 901 | .....  | 990 |
| HBA4313454.1   | 901 | .....  | 990 |
| WP_048228344.1 | 901 | N..... | 990 |
| HBM2060318.1   | 901 | .....  | 990 |
| HAI3750798.1   | 901 | .....  | 990 |
| HBC6041500.1   | 901 | .....  | 990 |
| MSI96964.1     | 901 | .....  | 990 |
| MBI9784956.1   | 901 | .....  | 990 |
| WP_181199831.1 | 901 | .....  | 990 |
| HBE4050048.1   | 901 | .....  | 990 |
| HBK1370968.1   | 901 | .....  | 990 |

Query range 12: 991 to 1080

|                |     |                                                                                           |      |
|----------------|-----|-------------------------------------------------------------------------------------------|------|
| Query          | 991 | KSVANADAAKKATLLMSGYKAF LAEVNLLNKRMGDLRDINGESAWARIMSGTGSAGGGFSDNYTHVQVGADNKHELDGLDLFTGVTMT | 1080 |
| WP_001034082.1 | 991 | .....                                                                                     | 1080 |
| HAI6125783.1   | 991 | .....                                                                                     | 1080 |
| WP_021579527.1 | 991 | .....                                                                                     | 1080 |
| WP_142457960.1 | 991 | .....                                                                                     | 1080 |
| EFK6366304.1   | 991 | .....                                                                                     | 1080 |
| WP_114145544.1 | 991 | .....                                                                                     | 1080 |
| HBJ6073103.1   | 991 | .....                                                                                     | 1080 |
| WP_126896457.1 | 991 | .....                                                                                     | 1080 |
| HAI1961408.1   | 991 | .....                                                                                     | 1080 |
| WP_001034083.1 | 991 | .....                                                                                     | 1080 |
| WP_001034084.1 | 991 | .....                                                                                     | 1080 |
| AER85851.1     | 995 | .....                                                                                     | 1084 |
| WP_033864944.1 | 991 | .....                                                                                     | 1080 |
| EGD9592729.1   | 991 | .....                                                                                     | 1080 |
| HAL2735930.1   | 991 | .....                                                                                     | 1080 |
| WP_167580541.1 | 991 | .....                                                                                     | 1080 |
| WP_128430364.1 | 991 | .....                                                                                     | 1080 |
| HAL2502625.1   | 991 | .....                                                                                     | 1080 |
| EHI3940979.1   | 991 | .....                                                                                     | 1080 |
| WP_219054700.1 | 991 | .....                                                                                     | 1080 |
| MBI9726529.1   | 991 | .....                                                                                     | 1080 |
| HBB7276045.1   | 991 | .....                                                                                     | 1080 |
| WP_001556799.1 | 991 | .....                                                                                     | 1080 |
| HBC7568876.1   | 991 | .....                                                                                     | 1080 |
| HAH4707744.1   | 991 | .....                                                                                     | 1080 |
| WP_021525200.1 | 991 | .....                                                                                     | 1080 |
| HBA1304970.1   | 991 | .....                                                                                     | 1080 |
| WP_021545254.1 | 991 | .....                                                                                     | 1080 |
| WP_113341376.1 | 991 | .....                                                                                     | 1080 |
| HAX8501378.1   | 991 | .....                                                                                     | 1080 |
| HBC8781562.1   | 991 | .....                                                                                     | 1080 |
| WP_049074636.1 | 991 | .....                                                                                     | 1080 |
| WP_023150719.1 | 991 | .....                                                                                     | 1080 |
| EYE09558.1     | 991 | .....                                                                                     | 1080 |
| WP_021521406.1 | 991 | .....                                                                                     | 1080 |
| MBB0498836.1   | 991 | .....                                                                                     | 1080 |
| HAP0967861.1   | 991 | .....                                                                                     | 1080 |
| WP_149846178.1 | 991 | .....                                                                                     | 1080 |
| WP_060667427.1 | 991 | .....                                                                                     | 1080 |
| HBI9439922.1   | 991 | .....                                                                                     | 1080 |
| HBI7936509.1   | 991 | .....                                                                                     | 1080 |
| WP_225394784.1 | 991 | .....                                                                                     | 1080 |
| EHC2729660.1   | 991 | .....                                                                                     | 1080 |
| HAI5392434.1   | 991 | .....                                                                                     | 1080 |
| HAL3252735.1   | 991 | .....                                                                                     | 1080 |

|                |     |       |      |
|----------------|-----|-------|------|
| WP_139837327.1 | 991 | ..... | 1080 |
| WP_053901632.1 | 991 | ..... | 1080 |
| HAI3750294.1   | 991 | ..... | 1080 |
| WP_113956116.1 | 991 | ..... | 1080 |
| HAY5190267.1   | 991 | ..... | 1080 |
| MBS8788038.1   | 991 | ..... | 1080 |
| WP_064232224.1 | 991 | ..... | 1080 |
| WP_118909407.1 | 991 | ..... | 1080 |
| WP_115766409.1 | 991 | ..... | 1080 |
| WP_001611046.1 | 991 | ..... | 1080 |
| HBC4963495.1   | 991 | ..... | 1080 |
| EFH8304360.1   | 991 | ..... | 1080 |
| HAN2555901.1   | 991 | ..... | 1080 |
| MBI9242867.1   | 991 | ..... | 1080 |
| HAM4370941.1   | 991 | ..... | 1080 |
| WP_059319927.1 | 991 | ..... | 1080 |
| WP_113495884.1 | 991 | ..... | 1080 |
| WP_116991798.1 | 991 | ..... | 1080 |
| WP_140402642.1 | 991 | ..... | 1080 |
| WP_169783511.1 | 991 | ..... | 1080 |
| EEY5188439.1   | 991 | ..... | 1080 |
| HAG7649195.1   | 991 | ..... | 1080 |
| HBB1193796.1   | 991 | ..... | 1080 |
| WP_181203932.1 | 991 | ..... | 1080 |
| HAH6736077.1   | 991 | ..... | 1080 |
| HAN3395805.1   | 990 | ..... | 1079 |
| HAO7397004.1   | 991 | ..... | 1080 |
| HAI3867277.1   | 991 | ..... | 1080 |
| HBA4320359.1   | 991 | ..... | 1080 |
| HAG9275443.1   | 991 | ..... | 1080 |
| HAX0142153.1   | 991 | ..... | 1080 |
| WP_155951915.1 | 991 | ..... | 1080 |
| WP_225390149.1 | 991 | ..... | 1080 |
| WP_217822457.1 | 991 | ..... | 1080 |
| FFP7778397.1   | 991 | ..... | 1080 |
| HAM6401014.1   | 991 | ..... | 1080 |
| WP_094316666.1 | 991 | ..... | 1080 |
| MBB0854235.1   | 991 | ..... | 1080 |
| NPP26331.1     | 991 | ..... | 1080 |
| WP_199351549.1 | 991 | ..... | 1080 |
| HBA1072022.1   | 991 | ..... | 1080 |
| OSP32553.1     | 995 | ..... | 1084 |
| HBD2267896.1   | 991 | ..... | 1080 |
| HAX7888640.1   | 991 | ..... | 1080 |
| HAL3865995.1   | 991 | ..... | 1080 |
| HBA4313454.1   | 991 | ..... | 1080 |
| WP_048228344.1 | 991 | ..... | 1080 |
| HBM2060318.1   | 991 | ..... | 1080 |
| HAI3750798.1   | 991 | ..... | 1080 |
| HBC6041500.1   | 991 | ..... | 1080 |
| MSI96964.1     | 991 | ..... | 1080 |
| MBI9784956.1   | 991 | ..... | 1080 |
| WP_181199831.1 | 991 | ..... | 1080 |
| HBE4050048.1   | 991 | ..... | 1080 |
| HBK1370968.1   | 991 | ..... | 1080 |

Query range 13: 1081 to 1170

|                |      |                                                                                           |      |
|----------------|------|-------------------------------------------------------------------------------------------|------|
| Query          | 1081 | YTDSHAGSDAFSGETKSVGAGLYASAMFESGAYIDLIGKFVHHDNEYTATFAGLGRDYSYSSHWYAGAEGVGRYHVTDSAWIEPQALVY | 1170 |
| WP_001034082.1 | 1081 | .....                                                                                     | 1170 |
| HAI6125783.1   | 1081 | .....                                                                                     | 1170 |
| WP_021579527.1 | 1081 | .....                                                                                     | 1170 |
| WP_142457960.1 | 1081 | .....                                                                                     | 1170 |
| EFK6366304.1   | 1081 | .....                                                                                     | 1170 |
| WP_114145544.1 | 1081 | .....                                                                                     | 1170 |
| HBJ6073103.1   | 1081 | .....                                                                                     | 1170 |
| WP_126896457.1 | 1081 | .....                                                                                     | 1170 |
| HAI1961408.1   | 1081 | .....                                                                                     | 1170 |
| WP_001034083.1 | 1081 | .....                                                                                     | 1170 |
| WP_001034084.1 | 1081 | .....                                                                                     | 1170 |
| AER85851.1     | 1085 | .....                                                                                     | 1174 |
| WP_033864944.1 | 1081 | .....                                                                                     | 1170 |
| EGD9592729.1   | 1081 | .....                                                                                     | 1170 |
| HAL2735930.1   | 1081 | .....                                                                                     | 1170 |
| WP_167580541.1 | 1081 | .....                                                                                     | 1170 |
| WP_128430364.1 | 1081 | .....                                                                                     | 1170 |
| HAL2502625.1   | 1081 | .....                                                                                     | 1170 |
| EHI3940979.1   | 1081 | .....                                                                                     | 1170 |
| WP_219054700.1 | 1081 | .....                                                                                     | 1170 |
| MBI9726529.1   | 1081 | .....                                                                                     | 1170 |
| HBB7276045.1   | 1081 | .....                                                                                     | 1170 |
| WP_001556799.1 | 1081 | .....                                                                                     | 1170 |
| HBC7568876.1   | 1081 | .....                                                                                     | 1170 |
| HAH4707744.1   | 1081 | .....                                                                                     | 1170 |
| WP_021525200.1 | 1081 | .....                                                                                     | 1170 |
| HBA1304970.1   | 1081 | .....                                                                                     | 1170 |
| WP_021545254.1 | 1081 | .....                                                                                     | 1170 |
| WP_113341376.1 | 1081 | .....                                                                                     | 1170 |
| HAX8501378.1   | 1081 | .....                                                                                     | 1170 |
| HBC8781562.1   | 1081 | .....                                                                                     | 1170 |
| WP_049074636.1 | 1081 | .....                                                                                     | 1170 |
| WP_023150719.1 | 1081 | .....                                                                                     | 1170 |
| EYE09558.1     | 1081 | .....                                                                                     | 1170 |
| WP_021521406.1 | 1081 | .....                                                                                     | 1170 |
| MBB0498836.1   | 1081 | .....                                                                                     | 1170 |
| HAP0967861.1   | 1081 | .....                                                                                     | 1170 |
| WP_149846178.1 | 1081 | .....                                                                                     | 1170 |
| WP_060667427.1 | 1081 | .....                                                                                     | 1170 |
| HBI9439922.1   | 1081 | .....                                                                                     | 1170 |
| HBI7936509.1   | 1081 | .....                                                                                     | 1170 |
| WP_225394784.1 | 1081 | .....                                                                                     | 1170 |
| EHC2729660.1   | 1081 | .....                                                                                     | 1170 |
| HAI5392434.1   | 1081 | .....                                                                                     | 1170 |
| HAL3252735.1   | 1081 | .....                                                                                     | 1170 |
| WP_139837327.1 | 1081 | .....                                                                                     | 1170 |
| WP_053901632.1 | 1081 | .....                                                                                     | 1170 |
| HAI3750294.1   | 1081 | .....                                                                                     | 1170 |
| WP_113956116.1 | 1081 | .....                                                                                     | 1170 |
| HAY5190267.1   | 1081 | .....                                                                                     | 1170 |
| MBS8788038.1   | 1081 | .....                                                                                     | 1170 |
| WP_064232224.1 | 1081 | .....                                                                                     | 1170 |
| WP_118909407.1 | 1081 | .....                                                                                     | 1170 |
| WP_115766409.1 | 1081 | .....                                                                                     | 1170 |
| WP_001611046.1 | 1081 | .....                                                                                     | 1170 |
| HBC4963495.1   | 1081 | .....                                                                                     | 1170 |
| EFH8304360.1   | 1081 | .....                                                                                     | 1170 |
| HAN2555901.1   | 1081 | .....                                                                                     | 1170 |
| MBI9242867.1   | 1081 | .....                                                                                     | 1170 |
| HAM4370941.1   | 1081 | .....                                                                                     | 1170 |
| WP_059319927.1 | 1081 | .....                                                                                     | 1170 |
| WP_113495884.1 | 1081 | .....                                                                                     | 1170 |
| WP_116991798.1 | 1081 | .....                                                                                     | 1170 |
| WP_140402642.1 | 1081 | .....                                                                                     | 1170 |
| WP_169783511.1 | 1081 | .....                                                                                     | 1170 |
| EEY5188439.1   | 1081 | .....                                                                                     | 1170 |
| HAG7649195.1   | 1081 | .....                                                                                     | 1170 |
| HBB1193796.1   | 1081 | .....                                                                                     | 1170 |
| WP_181203932.1 | 1081 | .....                                                                                     | 1170 |

|                |      |             |        |      |
|----------------|------|-------------|--------|------|
| HAH6736077.1   | 1081 | .....Y..... | N..... | 1170 |
| HAN3395805.1   | 1080 | .....Y..... | .....  | 1169 |
| HAO7397004.1   | 1081 | .....Y..... | .....  | 1170 |
| HAI3867277.1   | 1081 | .....Y..... | .....  | 1170 |
| HBA4320359.1   | 1081 | .....Y..... | .....  | 1170 |
| HAG9275443.1   | 1081 | .....Y..... | .....  | 1170 |
| HAX0142153.1   | 1081 | .....Y..... | .....  | 1170 |
| WP_155951915.1 | 1081 | .....Y..... | .....  | 1170 |
| WP_225390149.1 | 1081 | .....Y..... | .....  | 1170 |
| WP_217822457.1 | 1081 | .....Y..... | .....  | 1170 |
| FFP7778397.1   | 1081 | .....Y..... | .....  | 1170 |
| HAM6401014.1   | 1081 | .....Y..... | .....  | 1170 |
| WP_094316666.1 | 1081 | .....Y..... | .....  | 1170 |
| MBB0854235.1   | 1081 | .....Y..... | .....  | 1170 |
| NPP26331.1     | 1081 | .....Y..... | .....  | 1170 |
| WP_199351549.1 | 1081 | .....Y..... | .....  | 1170 |
| HBA1072022.1   | 1081 | .....Y..... | .....  | 1170 |
| OSP32553.1     | 1085 | .....Y..... | .....  | 1174 |
| HBD2267896.1   | 1081 | .....Y..... | .....  | 1170 |
| HAX7888640.1   | 1081 | .....Y..... | .....  | 1170 |
| HAL3865995.1   | 1081 | .....Y..... | .....  | 1170 |
| HBA4313454.1   | 1081 | .....Y..... | .....  | 1170 |
| WP_048228344.1 | 1081 | .....Y..... | .....  | 1170 |
| HBM2060318.1   | 1081 | .....Y..... | .....  | 1170 |
| HAI3750798.1   | 1081 | .....Y..... | .....  | 1170 |
| HBC6041500.1   | 1081 | .....Y..... | .....  | 1170 |
| MSI96964.1     | 1081 | .....T..... | .....  | 1170 |
| MBI9784956.1   | 1081 | .....Y..... | .....  | 1170 |
| WP_181199831.1 | 1081 | .....Y..... | .....  | 1170 |
| HBE4050048.1   | 1081 | .....Y..... | .....  | 1170 |
| HBK1370968.1   | 1081 | .....Y..... | .....  | 1170 |

Query range 14: 1171 to 1260

|                |      |                                                                                          |      |
|----------------|------|------------------------------------------------------------------------------------------|------|
| Query          | 1171 | GAVSGKQFSWKDQGMNLTMKDKDFNPLIGRTGVDDVKSFGKDWKVTARAGLGYQFDLFANGETVLRDASGEKRIKGEKDRMLMNVGLN | 1260 |
| WP_001034082.1 | 1171 | .....                                                                                    | 1260 |
| HAI6125783.1   | 1171 | .....                                                                                    | 1260 |
| WP_021579527.1 | 1171 | .....                                                                                    | 1260 |
| WP_142457960.1 | 1171 | .....                                                                                    | 1260 |
| EFK6366304.1   | 1171 | .....                                                                                    | 1260 |
| WP_114145544.1 | 1171 | .....                                                                                    | 1260 |
| HBJ6073103.1   | 1171 | .....                                                                                    | 1260 |
| WP_126896457.1 | 1171 | .....                                                                                    | 1260 |
| HAI1961408.1   | 1171 | .....                                                                                    | 1260 |
| WP_001034083.1 | 1171 | .....                                                                                    | 1260 |
| WP_001034084.1 | 1171 | .....                                                                                    | 1260 |
| AER85851.1     | 1175 | .....                                                                                    | 1264 |
| WP_033864944.1 | 1171 | .....                                                                                    | 1260 |
| EGD9592729.1   | 1171 | .....                                                                                    | 1260 |
| HAL2735930.1   | 1171 | .....                                                                                    | 1260 |
| WP_167580541.1 | 1171 | .....                                                                                    | 1260 |
| WP_128430364.1 | 1171 | .....                                                                                    | 1260 |
| HAL2502625.1   | 1171 | .....                                                                                    | 1260 |
| EHI3940979.1   | 1171 | .....                                                                                    | 1260 |
| WP_219054700.1 | 1171 | .....                                                                                    | 1260 |
| MBI9726529.1   | 1171 | .....                                                                                    | 1260 |
| HBB7276045.1   | 1171 | .....                                                                                    | 1260 |
| WP_001556799.1 | 1171 | .....S.....                                                                              | 1260 |
| HBC7568876.1   | 1171 | .....                                                                                    | 1260 |
| HAH4707744.1   | 1171 | .....                                                                                    | 1260 |
| WP_021525200.1 | 1171 | .....                                                                                    | 1260 |
| HBA1304970.1   | 1171 | .....                                                                                    | 1260 |
| WP_021545254.1 | 1171 | .....                                                                                    | 1260 |
| WP_113341376.1 | 1171 | .....                                                                                    | 1260 |
| HAX8501378.1   | 1171 | .....                                                                                    | 1260 |
| HBC8781562.1   | 1171 | .....                                                                                    | 1260 |
| WP_049074636.1 | 1171 | .....                                                                                    | 1260 |
| WP_023150719.1 | 1171 | .....                                                                                    | 1260 |
| EYE09558.1     | 1171 | .....                                                                                    | 1260 |
| WP_021521406.1 | 1171 | .....                                                                                    | 1260 |
| MBB0498836.1   | 1171 | .....                                                                                    | 1260 |
| HAP0967861.1   | 1171 | .....                                                                                    | 1260 |
| WP_149846178.1 | 1171 | .....                                                                                    | 1260 |
| WP_060667427.1 | 1171 | .....                                                                                    | 1260 |
| HBI9439922.1   | 1171 | .....                                                                                    | 1260 |
| HBI7936509.1   | 1171 | .....                                                                                    | 1260 |
| WP_225394784.1 | 1171 | .....                                                                                    | 1260 |
| EHC2729660.1   | 1171 | .....                                                                                    | 1260 |
| HAI5392434.1   | 1171 | .....T.....                                                                              | 1260 |
| HAL3252735.1   | 1171 | .....                                                                                    | 1260 |
| WP_139837327.1 | 1171 | .....                                                                                    | 1260 |
| WP_053901632.1 | 1171 | .....                                                                                    | 1260 |
| HAI3750294.1   | 1171 | .....                                                                                    | 1260 |
| WP_113956116.1 | 1171 | .....                                                                                    | 1260 |
| HAY5190267.1   | 1171 | .....                                                                                    | 1260 |
| MBS8788038.1   | 1171 | .....                                                                                    | 1260 |
| WP_064232224.1 | 1171 | .....                                                                                    | 1260 |
| WP_118909407.1 | 1171 | .....                                                                                    | 1260 |
| WP_115766409.1 | 1171 | .....                                                                                    | 1260 |
| WP_001611046.1 | 1171 | .....                                                                                    | 1260 |
| HBC4963495.1   | 1171 | .....                                                                                    | 1260 |
| EFH8304360.1   | 1171 | .....                                                                                    | 1260 |
| HAN2555901.1   | 1171 | .....                                                                                    | 1260 |
| MBI9242867.1   | 1171 | .....                                                                                    | 1260 |
| HAM4370941.1   | 1171 | .....                                                                                    | 1260 |
| WP_059319927.1 | 1171 | .....                                                                                    | 1260 |
| WP_113495884.1 | 1171 | .....                                                                                    | 1260 |
| WP_116991798.1 | 1171 | .....                                                                                    | 1260 |
| WP_140402642.1 | 1171 | .....                                                                                    | 1260 |
| WP_169783511.1 | 1171 | .....                                                                                    | 1260 |
| EY5188439.1    | 1171 | .....                                                                                    | 1260 |
| HAG7649195.1   | 1171 | .....                                                                                    | 1260 |
| HBB1193796.1   | 1171 | .....                                                                                    | 1260 |
| WP_181203932.1 | 1171 | .....                                                                                    | 1260 |
| HAH6736077.1   | 1171 | .....                                                                                    | 1260 |
| HAN3395805.1   | 1170 | .....                                                                                    | 1259 |
| HAO7397004.1   | 1171 | .....                                                                                    | 1260 |
| HAI3867277.1   | 1171 | .....                                                                                    | 1260 |
| HBA4320359.1   | 1171 | .....                                                                                    | 1260 |
| HAG9275443.1   | 1171 | .....                                                                                    | 1260 |
| HAX0142153.1   | 1171 | .....                                                                                    | 1260 |
| WP_155951915.1 | 1171 | .....                                                                                    | 1260 |
| WP_225390149.1 | 1171 | .....                                                                                    | 1260 |
| WP_217822457.1 | 1171 | .....                                                                                    | 1260 |
| FFP7778397.1   | 1171 | .....                                                                                    | 1260 |
| HAM6401014.1   | 1171 | .....                                                                                    | 1260 |
| WP_094316666.1 | 1171 | .....A.....                                                                              | 1260 |
| MBB0854235.1   | 1171 | .....                                                                                    | 1260 |
| NPP26331.1     | 1171 | .....                                                                                    | 1260 |
| WP_199351549.1 | 1171 | .....                                                                                    | 1260 |
| HBA1072022.1   | 1171 | .....                                                                                    | 1260 |
| OSP32553.1     | 1175 | .....                                                                                    | 1264 |
| HBD2267896.1   | 1171 | .....                                                                                    | 1260 |
| HAX7888640.1   | 1171 | .....S.....                                                                              | 1260 |
| HAL3865995.1   | 1171 | .....                                                                                    | 1260 |
| HBA4313454.1   | 1171 | .....                                                                                    | 1260 |
| WP_048228344.1 | 1171 | .....                                                                                    | 1260 |
| HBM2060318.1   | 1171 | .....                                                                                    | 1260 |

```
HAJ3750798.1 1171 ..... 1260
HBC6041500.1 1171 ..... 1260
MSI96964.1 1171 ..... 1260
MBI9784956.1 1171 ..... 1260
WP_181199831.1 1171 ..... 1260
HBE4050048.1 1171 ..... 1260
HBK1370968.1 1171 ..... 1260
```

Query range 15: 1261 to 1295

```
Query 1261 AEIRDNLRFGLFEKSAFGKYNVDNAINANFRYSF 1295
WP_001034082.1 1261 ..... 1295
HAI6125783.1 1261 ..... 1295
WP_021579527.1 1261 ..... 1295
WP_142457960.1 1261 ..... 1295
EFK6366304.1 1261 ..... 1295
WP_114145544.1 1261 ..... 1295
HBJ6073103.1 1261 ..... 1295
WP_126896457.1 1261 ..... 1295
HAJ1961408.1 1261 ..... 1295
WP_001034083.1 1261 ..... 1295
WP_001034084.1 1261 ..... 1295
AER85851.1 1265 ..... 1299
WP_033864944.1 1261 ..... 1295
EGD9592729.1 1261 ..... 1295
HAL2735930.1 1261 ..... 1295
WP_167580541.1 1261 ..... 1295
WP_128430364.1 1261 ..... 1295
HAL2502625.1 1261 ..... 1295
EHI3940979.1 1261 ..... 1295
WP_219054700.1 1261 ..... 1295
MBI9726529.1 1261 ..... 1295
HBB7276045.1 1261 ..... 1295
WP_001556799.1 1261 ..... 1295
HBC7568876.1 1261 ..... 1295
HAH4707744.1 1261 ..... 1295
WP_021525200.1 1261 ..... 1295
HBA1304970.1 1261 ..... 1295
WP_021545254.1 1261 ..... 1295
WP_113341376.1 1261 ..... 1295
HAX8501378.1 1261 ..... 1295
HBC8781562.1 1261 ..... 1295
WP_049074636.1 1261 ..... 1295
WP_023150719.1 1261 ..... 1295
EYE09558.1 1261 ..... 1295
WP_021521406.1 1261 ..... 1295
MBB0498836.1 1261 ..... 1295
HAP0967861.1 1261 ..... 1295
WP_149846178.1 1261 ..... 1295
WP_060667427.1 1261 ..... 1295
HBI9439922.1 1261 ..... 1295
HBI7936509.1 1261 ..... 1295
WP_225394784.1 1261 ..... 1295
EHC2729660.1 1261 ..... 1295
HAI5392434.1 1261 ..... 1295
HAL3252735.1 1261 ..... 1295
WP_139837327.1 1261 ..... 1295
WP_053901632.1 1261 ..... 1295
HAI3750294.1 1261 ..... 1295
WP_113956116.1 1261 ..... 1295
HAY5190267.1 1261 ..... 1295
MBS8788038.1 1261 ..... 1295
WP_064232224.1 1261 ..... 1295
WP_118909407.1 1261 ..... 1295
WP_115766409.1 1261 ..... 1295
WP_001611046.1 1261 ..... 1295
HBC4963495.1 1261 ..... 1295
EFH8304360.1 1261 ..... 1295
HAN2555901.1 1261 ..... 1295
MBI9242867.1 1261 ..... 1295
HAM4370941.1 1261 ..... 1295
WP_059319927.1 1261 ..... 1295
WP_113495884.1 1261 ..... 1295
WP_116991798.1 1261 ..... 1295
WP_140402642.1 1261 ..... 1294
WP_169783511.1 1261 ..... 1295
EEY5188439.1 1261 ..... 1295
HAG7649195.1 1261 ..... 1295
HBB1193796.1 1261 ..... 1295
WP_181203932.1 1261 ..... 1295
HAN6736077.1 1261 ..... 1295
HAN3395805.1 1260 ..... 1294
HAO7397004.1 1261 ..... 1295
HAI3867277.1 1261 ..... 1295
HBA4320359.1 1261 ..... 1295
HAG9275443.1 1261 ..... 1295
HAX0142153.1 1261 ..... 1295
WP_155951915.1 1261 ..... 1295
WP_225390149.1 1261 ..... 1295
WP_217822457.1 1261 ..... 1295
EFP7778397.1 1261 ..... 1295
HAM6401014.1 1261 ..... 1295
WP_094316666.1 1261 ..... 1295
MBB0854235.1 1261 ..... 1295
NPP26331.1 1261 ..... 1295
WP_199351549.1 1261 ..... 1295
HBA1072022.1 1261 ..... 1295
OSP32553.1 1265 ..... 1299
HBD2267896.1 1261 ..... 1295
HAX7888640.1 1261 ..... 1295
HAL3865995.1 1261 ..... 1295
HBA4313454.1 1261 ..... 1295
WP_048228344.1 1261 ..... 1295
HBM2060318.1 1261 ..... 1295
HAJ3750798.1 1261 ..... 1295
HBC6041500.1 1261 ..... 1295
MSI96964.1 1261 ..... 1295
MBI9784956.1 1261 ..... 1295
WP_181199831.1 1261 ..... 1295
HBE4050048.1 1261 ..... 1295
HBK1370968.1 1261 ..... 1295
```

**Taxonomy**

**Reports**

◦ **Lineage**

| Organism                           | Blast Name                     | Score | Number of Hits      | Description |
|------------------------------------|--------------------------------|-------|---------------------|-------------|
| <a href="#">Enterobacterales</a>   | <a href="#">enterobacteria</a> |       | <a href="#">292</a> |             |
| <a href="#">Enterobacteriaceae</a> | <a href="#">enterobacteria</a> |       | <a href="#">2</a>   |             |



|                                                        |                                |      |            |                                                          |
|--------------------------------------------------------|--------------------------------|------|------------|----------------------------------------------------------|
| <a href="#">..Escherichia</a>                          | <a href="#">enterobacteria</a> |      | <u>277</u> |                                                          |
| <a href="#">...Escherichia coli</a>                    | <a href="#">enterobacteria</a> | 2631 | <u>197</u> | <a href="#">Escherichia coli hits</a>                    |
| <a href="#">...Escherichia coli O1</a>                 | <a href="#">enterobacteria</a> | 2631 | <u>1</u>   | <a href="#">Escherichia coli O1 hits</a>                 |
| <a href="#">...Escherichia coli UMEA 3899-1</a>        | <a href="#">enterobacteria</a> | 2629 | <u>1</u>   | <a href="#">Escherichia coli UMEA 3899-1 hits</a>        |
| <a href="#">...Escherichia coli O39:H4</a>             | <a href="#">enterobacteria</a> | 2629 | <u>1</u>   | <a href="#">Escherichia coli O39:H4 hits</a>             |
| <a href="#">...Escherichia coli O157:H7</a>            | <a href="#">enterobacteria</a> | 2629 | <u>1</u>   | <a href="#">Escherichia coli O157:H7 hits</a>            |
| <a href="#">...Escherichia coli O25</a>                | <a href="#">enterobacteria</a> | 2629 | <u>1</u>   | <a href="#">Escherichia coli O25 hits</a>                |
| <a href="#">...Escherichia coli IS35</a>               | <a href="#">enterobacteria</a> | 2629 | <u>1</u>   | <a href="#">Escherichia coli IS35 hits</a>               |
| <a href="#">...Escherichia coli UMEA 3252-1</a>        | <a href="#">enterobacteria</a> | 2629 | <u>1</u>   | <a href="#">Escherichia coli UMEA 3252-1 hits</a>        |
| <a href="#">...Escherichia coli HVH 93 (4-5851025)</a> | <a href="#">enterobacteria</a> | 2629 | <u>1</u>   | <a href="#">Escherichia coli HVH 93 (4-5851025) hits</a> |
| <a href="#">...Escherichia coli KN1604</a>             | <a href="#">enterobacteria</a> | 2629 | <u>1</u>   | <a href="#">Escherichia coli KN1604 hits</a>             |
| <a href="#">...Escherichia coli MH5800</a>             | <a href="#">enterobacteria</a> | 2629 | <u>1</u>   | <a href="#">Escherichia coli MH5800 hits</a>             |
| <a href="#">...Escherichia coli JJ2657</a>             | <a href="#">enterobacteria</a> | 2629 | <u>1</u>   | <a href="#">Escherichia coli JJ2657 hits</a>             |
| <a href="#">...Escherichia coli JJ2608</a>             | <a href="#">enterobacteria</a> | 2629 | <u>1</u>   | <a href="#">Escherichia coli JJ2608 hits</a>             |
| <a href="#">...Escherichia coli JJ2555</a>             | <a href="#">enterobacteria</a> | 2629 | <u>1</u>   | <a href="#">Escherichia coli JJ2555 hits</a>             |
| <a href="#">...Escherichia coli JJ2550</a>             | <a href="#">enterobacteria</a> | 2629 | <u>1</u>   | <a href="#">Escherichia coli JJ2550 hits</a>             |
| <a href="#">...Escherichia coli JJ2578</a>             | <a href="#">enterobacteria</a> | 2629 | <u>1</u>   | <a href="#">Escherichia coli JJ2578 hits</a>             |
| <a href="#">...Escherichia coli JJ2528</a>             | <a href="#">enterobacteria</a> | 2629 | <u>1</u>   | <a href="#">Escherichia coli JJ2528 hits</a>             |
| <a href="#">...Escherichia coli JJ2508</a>             | <a href="#">enterobacteria</a> | 2629 | <u>1</u>   | <a href="#">Escherichia coli JJ2508 hits</a>             |
| <a href="#">...Escherichia coli JJ2444</a>             | <a href="#">enterobacteria</a> | 2629 | <u>1</u>   | <a href="#">Escherichia coli JJ2444 hits</a>             |
| <a href="#">...Escherichia coli ZH063</a>              | <a href="#">enterobacteria</a> | 2629 | <u>1</u>   | <a href="#">Escherichia coli ZH063 hits</a>              |
| <a href="#">...Escherichia coli ZH071</a>              | <a href="#">enterobacteria</a> | 2629 | <u>1</u>   | <a href="#">Escherichia coli ZH071 hits</a>              |
| <a href="#">...Escherichia coli CD340</a>              | <a href="#">enterobacteria</a> | 2629 | <u>1</u>   | <a href="#">Escherichia coli CD340 hits</a>              |
| <a href="#">...Escherichia coli ZH164</a>              | <a href="#">enterobacteria</a> | 2629 | <u>1</u>   | <a href="#">Escherichia coli ZH164 hits</a>              |
| <a href="#">...Escherichia coli U024</a>               | <a href="#">enterobacteria</a> | 2629 | <u>1</u>   | <a href="#">Escherichia coli U024 hits</a>               |
| <a href="#">...Escherichia coli U004</a>               | <a href="#">enterobacteria</a> | 2629 | <u>1</u>   | <a href="#">Escherichia coli U004 hits</a>               |
| <a href="#">...Escherichia coli SaT158</a>             | <a href="#">enterobacteria</a> | 2629 | <u>1</u>   | <a href="#">Escherichia coli SaT158 hits</a>             |
| <a href="#">...Escherichia coli SaT040</a>             | <a href="#">enterobacteria</a> | 2629 | <u>1</u>   | <a href="#">Escherichia coli SaT040 hits</a>             |
| <a href="#">...Escherichia coli SaT049</a>             | <a href="#">enterobacteria</a> | 2629 | <u>1</u>   | <a href="#">Escherichia coli SaT049 hits</a>             |
| <a href="#">...Escherichia coli MVASt179</a>           | <a href="#">enterobacteria</a> | 2629 | <u>1</u>   | <a href="#">Escherichia coli MVASt179 hits</a>           |
| <a href="#">...Escherichia coli MVASt131</a>           | <a href="#">enterobacteria</a> | 2629 | <u>1</u>   | <a href="#">Escherichia coli MVASt131 hits</a>           |
| <a href="#">...Escherichia coli JJ2038</a>             | <a href="#">enterobacteria</a> | 2629 | <u>1</u>   | <a href="#">Escherichia coli JJ2038 hits</a>             |
| <a href="#">...Escherichia coli JJ2183</a>             | <a href="#">enterobacteria</a> | 2629 | <u>1</u>   | <a href="#">Escherichia coli JJ2183 hits</a>             |
| <a href="#">...Escherichia coli MVASt084</a>           | <a href="#">enterobacteria</a> | 2629 | <u>1</u>   | <a href="#">Escherichia coli MVASt084 hits</a>           |
| <a href="#">...Escherichia coli MVASt077</a>           | <a href="#">enterobacteria</a> | 2629 | <u>1</u>   | <a href="#">Escherichia coli MVASt077 hits</a>           |
| <a href="#">...Escherichia coli JJ1908</a>             | <a href="#">enterobacteria</a> | 2629 | <u>1</u>   | <a href="#">Escherichia coli JJ1908 hits</a>             |
| <a href="#">...Escherichia coli JJ2050</a>             | <a href="#">enterobacteria</a> | 2629 | <u>1</u>   | <a href="#">Escherichia coli JJ2050 hits</a>             |
| <a href="#">...Escherichia coli JJ2193</a>             | <a href="#">enterobacteria</a> | 2629 | <u>1</u>   | <a href="#">Escherichia coli JJ2193 hits</a>             |
| <a href="#">...Escherichia coli JJ2643</a>             | <a href="#">enterobacteria</a> | 2629 | <u>1</u>   | <a href="#">Escherichia coli JJ2643 hits</a>             |
| <a href="#">...Escherichia coli JJ2016</a>             | <a href="#">enterobacteria</a> | 2629 | <u>1</u>   | <a href="#">Escherichia coli JJ2016 hits</a>             |
| <a href="#">...Escherichia coli MVASt038</a>           | <a href="#">enterobacteria</a> | 2629 | <u>1</u>   | <a href="#">Escherichia coli MVASt038 hits</a>           |
| <a href="#">...Escherichia coli MVASt046</a>           | <a href="#">enterobacteria</a> | 2629 | <u>1</u>   | <a href="#">Escherichia coli MVASt046 hits</a>           |
| <a href="#">...Escherichia coli H061</a>               | <a href="#">enterobacteria</a> | 2629 | <u>1</u>   | <a href="#">Escherichia coli H061 hits</a>               |
| <a href="#">...Escherichia coli MVASt014</a>           | <a href="#">enterobacteria</a> | 2629 | <u>1</u>   | <a href="#">Escherichia coli MVASt014 hits</a>           |
| <a href="#">...Escherichia coli MVASt0036</a>          | <a href="#">enterobacteria</a> | 2629 | <u>1</u>   | <a href="#">Escherichia coli MVASt0036 hits</a>          |
| <a href="#">...Escherichia coli JJ1897</a>             | <a href="#">enterobacteria</a> | 2629 | <u>1</u>   | <a href="#">Escherichia coli JJ1897 hits</a>             |
| <a href="#">...Escherichia coli G213</a>               | <a href="#">enterobacteria</a> | 2629 | <u>1</u>   | <a href="#">Escherichia coli G213 hits</a>               |
| <a href="#">...Escherichia coli G132</a>               | <a href="#">enterobacteria</a> | 2629 | <u>1</u>   | <a href="#">Escherichia coli G132 hits</a>               |
| <a href="#">...Escherichia coli JJ1901</a>             | <a href="#">enterobacteria</a> | 2629 | <u>1</u>   | <a href="#">Escherichia coli JJ1901 hits</a>             |
| <a href="#">...Escherichia coli H016</a>               | <a href="#">enterobacteria</a> | 2629 | <u>1</u>   | <a href="#">Escherichia coli H016 hits</a>               |
| <a href="#">...Escherichia coli G150</a>               | <a href="#">enterobacteria</a> | 2629 | <u>1</u>   | <a href="#">Escherichia coli G150 hits</a>               |
| <a href="#">...Escherichia coli CU758</a>              | <a href="#">enterobacteria</a> | 2629 | <u>1</u>   | <a href="#">Escherichia coli CU758 hits</a>              |
| <a href="#">...Escherichia coli H003</a>               | <a href="#">enterobacteria</a> | 2629 | <u>1</u>   | <a href="#">Escherichia coli H003 hits</a>               |
| <a href="#">...Escherichia coli H006</a>               | <a href="#">enterobacteria</a> | 2629 | <u>1</u>   | <a href="#">Escherichia coli H006 hits</a>               |
| <a href="#">...Escherichia coli CD400</a>              | <a href="#">enterobacteria</a> | 2629 | <u>1</u>   | <a href="#">Escherichia coli CD400 hits</a>              |
| <a href="#">...Escherichia coli C001</a>               | <a href="#">enterobacteria</a> | 2629 | <u>1</u>   | <a href="#">Escherichia coli C001 hits</a>               |
| <a href="#">...Escherichia coli JJ2118</a>             | <a href="#">enterobacteria</a> | 2629 | <u>1</u>   | <a href="#">Escherichia coli JJ2118 hits</a>             |
| <a href="#">...Escherichia coli JJ2134</a>             | <a href="#">enterobacteria</a> | 2629 | <u>1</u>   | <a href="#">Escherichia coli JJ2134 hits</a>             |
| <a href="#">...Escherichia coli JJ2547</a>             | <a href="#">enterobacteria</a> | 2629 | <u>1</u>   | <a href="#">Escherichia coli JJ2547 hits</a>             |
| <a href="#">...Escherichia coli O157:H7 str. EC10</a>  | <a href="#">enterobacteria</a> | 2628 | <u>1</u>   | <a href="#">Escherichia coli O157:H7 str. EC10 hits</a>  |
| <a href="#">...Escherichia coli VR50</a>               | <a href="#">enterobacteria</a> | 2628 | <u>1</u>   | <a href="#">Escherichia coli VR50 hits</a>               |
| <a href="#">...Escherichia coli str. 'clone D i2'</a>  | <a href="#">enterobacteria</a> | 2628 | <u>1</u>   | <a href="#">Escherichia coli str. 'clone D i2' hits</a>  |
| <a href="#">...Escherichia coli str. 'clone D i14'</a> | <a href="#">enterobacteria</a> | 2628 | <u>1</u>   | <a href="#">Escherichia coli str. 'clone D i14' hits</a> |
| <a href="#">...Escherichia coli O25b:H4</a>            | <a href="#">enterobacteria</a> | 2628 | <u>1</u>   | <a href="#">Escherichia coli O25b:H4 hits</a>            |
| <a href="#">...Escherichia coli LAU-EC7</a>            | <a href="#">enterobacteria</a> | 2628 | <u>1</u>   | <a href="#">Escherichia coli LAU-EC7 hits</a>            |

|                                         |                                |      |   |                                                           |
|-----------------------------------------|--------------------------------|------|---|-----------------------------------------------------------|
| ...Escherichia coli 1-250-04_S4_C2      | <a href="#">enterobacteria</a> | 2628 | 1 | <a href="#">Escherichia coli 1-250-04_S4_C2 hits</a>      |
| ...Escherichia coli 1-250-04_S4_C1      | <a href="#">enterobacteria</a> | 2628 | 1 | <a href="#">Escherichia coli 1-250-04_S4_C1 hits</a>      |
| ...Escherichia coli KTE57               | <a href="#">enterobacteria</a> | 2628 | 1 | <a href="#">Escherichia coli KTE57 hits</a>               |
| ...Escherichia coli HVH 77 (4-2605759)  | <a href="#">enterobacteria</a> | 2628 | 1 | <a href="#">Escherichia coli HVH 77 (4-2605759) hits</a>  |
| ...Escherichia coli HVH 216 (4-3042952) | <a href="#">enterobacteria</a> | 2627 | 1 | <a href="#">Escherichia coli HVH 216 (4-3042952) hits</a> |
| ...Escherichia coli 910096-2            | <a href="#">enterobacteria</a> | 2627 | 1 | <a href="#">Escherichia coli 910096-2 hits</a>            |
| ...Escherichia coli 1-110-08_S4_C1      | <a href="#">enterobacteria</a> | 2627 | 1 | <a href="#">Escherichia coli 1-110-08_S4_C1 hits</a>      |
| ...Escherichia coli HVH 51 (4-2172526)  | <a href="#">enterobacteria</a> | 2627 | 1 | <a href="#">Escherichia coli HVH 51 (4-2172526) hits</a>  |
| ...Escherichia coli O21                 | <a href="#">enterobacteria</a> | 2627 | 1 | <a href="#">Escherichia coli O21 hits</a>                 |
| ...Escherichia coli G199                | <a href="#">enterobacteria</a> | 2627 | 1 | <a href="#">Escherichia coli G199 hits</a>                |
| ...Escherichia coli O25b:H4-ST131       | <a href="#">enterobacteria</a> | 2627 | 6 | <a href="#">Escherichia coli O25b:H4-ST131 hits</a>       |
| ...Escherichia coli MVA5T158            | <a href="#">enterobacteria</a> | 2627 | 1 | <a href="#">Escherichia coli MVA5T158 hits</a>            |
| ..Shigella flexneri                     | <a href="#">enterobacteria</a> | 2631 | 7 | <a href="#">Shigella flexneri hits</a>                    |
| ..Shigella boydii                       | <a href="#">enterobacteria</a> | 2631 | 2 | <a href="#">Shigella boydii hits</a>                      |
| ..Shigella sp. FC2045                   | <a href="#">enterobacteria</a> | 2631 | 1 | <a href="#">Shigella sp. FC2045 hits</a>                  |
| ..Shigella sp. FC2928                   | <a href="#">enterobacteria</a> | 2631 | 1 | <a href="#">Shigella sp. FC2928 hits</a>                  |
| ..Shigella sonnei                       | <a href="#">enterobacteria</a> | 2629 | 2 | <a href="#">Shigella sonnei hits</a>                      |
| ..Enterobacteriaceae                    | <a href="#">enterobacteria</a> | 2629 | 2 | <a href="#">Enterobacteriaceae hits</a>                   |

o Organism

| Description                                                                                             | Score | E value | Accession                    |
|---------------------------------------------------------------------------------------------------------|-------|---------|------------------------------|
| Escherichia coli [enterobacteria ]                                                                      |       |         |                              |
| <a href="#">serine protease autotransporter toxin Sat [Escherichia coli]</a>                            | 2631  | 0.0     | <a href="#">WP_001034082</a> |
| <a href="#">serine protease autotransporter toxin Sat [Escherichia coli]</a>                            | 2630  | 0.0     | <a href="#">HAI6125783</a>   |
| <a href="#">serine protease autotransporter toxin Sat [Escherichia coli]</a>                            | 2629  | 0.0     | <a href="#">WP_021579527</a> |
| <a href="#">serine protease autotransporter toxin Sat [Escherichia coli]</a>                            | 2629  | 0.0     | <a href="#">WP_142457960</a> |
| <a href="#">serine protease autotransporter toxin Sat [Escherichia coli]</a>                            | 2629  | 0.0     | <a href="#">HAH7070639</a>   |
| <a href="#">serine protease autotransporter toxin Sat [Escherichia coli]</a>                            | 2629  | 0.0     | <a href="#">HAI5503062</a>   |
| <a href="#">serine protease autotransporter toxin Sat [Escherichia coli]</a>                            | 2629  | 0.0     | <a href="#">HBC8693275</a>   |
| <a href="#">serine protease autotransporter toxin Sat [Escherichia coli]</a>                            | 2629  | 0.0     | <a href="#">EFK6366304</a>   |
| <a href="#">serine protease autotransporter toxin Sat [Escherichia coli]</a>                            | 2629  | 0.0     | <a href="#">WP_114145544</a> |
| <a href="#">autotransporter outer membrane beta-barrel domain-containing protein [Escherichia coli]</a> | 2629  | 0.0     | <a href="#">OOI47530</a>     |
| <a href="#">autotransporter outer membrane beta-barrel domain-containing protein [Escherichia coli]</a> | 2629  | 0.0     | <a href="#">OOJ42315</a>     |
| <a href="#">serine protease autotransporter toxin Sat [Escherichia coli]</a>                            | 2629  | 0.0     | <a href="#">HBJ6073103</a>   |
| <a href="#">serine protease autotransporter toxin Sat [Escherichia coli]</a>                            | 2629  | 0.0     | <a href="#">EGO3808398</a>   |
| <a href="#">serine protease autotransporter toxin Sat [Escherichia coli]</a>                            | 2629  | 0.0     | <a href="#">MBI9649871</a>   |
| <a href="#">serine protease autotransporter toxin Sat [Escherichia coli]</a>                            | 2629  | 0.0     | <a href="#">MBW9499880</a>   |
| <a href="#">serine protease autotransporter toxin Sat [Escherichia coli]</a>                            | 2629  | 0.0     | <a href="#">MBW9539912</a>   |
| <a href="#">serine protease autotransporter toxin Sat [Escherichia coli]</a>                            | 2629  | 0.0     | <a href="#">MBW9598623</a>   |
| <a href="#">serine protease autotransporter toxin Sat [Escherichia coli]</a>                            | 2629  | 0.0     | <a href="#">HAJ1961408</a>   |
| <a href="#">serine protease autotransporter toxin Sat [Escherichia coli]</a>                            | 2628  | 0.0     | <a href="#">WP_001034084</a> |
| <a href="#">serine protease autotransporter toxin Sat [Escherichia coli]</a>                            | 2628  | 0.0     | <a href="#">EAB6864467</a>   |
| <a href="#">serine protease autotransporter toxin Sat [Escherichia coli]</a>                            | 2628  | 0.0     | <a href="#">EEU2827586</a>   |
| <a href="#">serine protease autotransporter toxin Sat [Escherichia coli]</a>                            | 2628  | 0.0     | <a href="#">EFA4390733</a>   |
| <a href="#">autotransporter outer membrane beta-barrel domain-containing protein [Escherichia coli]</a> | 2628  | 0.0     | <a href="#">AQV56180</a>     |
| <a href="#">serine protease autotransporter toxin Sat [Escherichia coli]</a>                            | 2628  | 0.0     | <a href="#">WP_033864944</a> |
| <a href="#">serine protease autotransporter toxin Sat [Escherichia coli]</a>                            | 2628  | 0.0     | <a href="#">EGD9592729</a>   |
| <a href="#">serine protease autotransporter toxin Sat [Escherichia coli]</a>                            | 2628  | 0.0     | <a href="#">HAL2735930</a>   |
| <a href="#">serine protease autotransporter toxin Sat [Escherichia coli]</a>                            | 2628  | 0.0     | <a href="#">WP_167580541</a> |
| <a href="#">serine protease autotransporter toxin Sat [Escherichia coli]</a>                            | 2628  | 0.0     | <a href="#">NJB54887</a>     |
| <a href="#">serine protease autotransporter toxin Sat [Escherichia coli]</a>                            | 2628  | 0.0     | <a href="#">WP_128430364</a> |
| <a href="#">serine protease autotransporter toxin Sat [Escherichia coli]</a>                            | 2628  | 0.0     | <a href="#">EFA4555807</a>   |
| <a href="#">serine protease autotransporter toxin Sat [Escherichia coli]</a>                            | 2628  | 0.0     | <a href="#">EFB2292560</a>   |
| <a href="#">serine protease autotransporter toxin Sat [Escherichia coli]</a>                            | 2628  | 0.0     | <a href="#">EFK2831551</a>   |
| <a href="#">serine protease autotransporter toxin Sat [Escherichia coli]</a>                            | 2628  | 0.0     | <a href="#">EGD8224732</a>   |
| <a href="#">serine protease autotransporter toxin Sat [Escherichia coli]</a>                            | 2628  | 0.0     | <a href="#">EGE0307816</a>   |
| <a href="#">serine protease autotransporter toxin Sat [Escherichia coli]</a>                            | 2628  | 0.0     | <a href="#">HAL2502625</a>   |
| <a href="#">autotransporter outer membrane beta-barrel domain-containing protein [Escherichia coli]</a> | 2628  | 0.0     | <a href="#">WP_219054700</a> |
| <a href="#">serine protease autotransporter toxin Sat [Escherichia coli]</a>                            | 2628  | 0.0     | <a href="#">MBW2806267</a>   |
| <a href="#">serine protease autotransporter toxin Sat [Escherichia coli]</a>                            | 2628  | 0.0     | <a href="#">MBI9726529</a>   |
| <a href="#">serine protease autotransporter toxin Sat [Escherichia coli]</a>                            | 2628  | 0.0     | <a href="#">HAI9203572</a>   |
| <a href="#">serine protease autotransporter toxin Sat [Escherichia coli]</a>                            | 2628  | 0.0     | <a href="#">HBB7276045</a>   |
| <a href="#">serine protease autotransporter toxin Sat [Escherichia coli]</a>                            | 2628  | 0.0     | <a href="#">WP_001556799</a> |

| Description                                                                                             | Score | E value | Accession                    |
|---------------------------------------------------------------------------------------------------------|-------|---------|------------------------------|
| <a href="#">serine protease autotransporter toxin Sat [Escherichia coli]</a>                            | 2628  | 0.0     | <a href="#">HAI3051513</a>   |
| <a href="#">serine protease autotransporter toxin Sat [Escherichia coli]</a>                            | 2628  | 0.0     | <a href="#">HAI4879870</a>   |
| <a href="#">serine protease autotransporter toxin Sat [Escherichia coli]</a>                            | 2628  | 0.0     | <a href="#">HAY4619476</a>   |
| <a href="#">serine protease autotransporter toxin Sat [Escherichia coli]</a>                            | 2628  | 0.0     | <a href="#">HAY5587971</a>   |
| <a href="#">serine protease autotransporter toxin Sat [Escherichia coli]</a>                            | 2628  | 0.0     | <a href="#">HBC7568876</a>   |
| <a href="#">serine protease autotransporter toxin Sat [Escherichia coli]</a>                            | 2628  | 0.0     | <a href="#">HAH4707744</a>   |
| <a href="#">serine protease autotransporter toxin Sat [Escherichia coli]</a>                            | 2628  | 0.0     | <a href="#">WP_021525200</a> |
| <a href="#">serine protease autotransporter toxin Sat [Escherichia coli]</a>                            | 2628  | 0.0     | <a href="#">HBA1304970</a>   |
| <a href="#">serine protease autotransporter toxin Sat [Escherichia coli]</a>                            | 2627  | 0.0     | <a href="#">WP_021545254</a> |
| <a href="#">serine protease autotransporter toxin Sat [Escherichia coli]</a>                            | 2627  | 0.0     | <a href="#">WP_113341376</a> |
| <a href="#">serine protease autotransporter toxin Sat [Escherichia coli]</a>                            | 2627  | 0.0     | <a href="#">EFN2062961</a>   |
| <a href="#">serine protease autotransporter toxin Sat [Escherichia coli]</a>                            | 2627  | 0.0     | <a href="#">MQR32067</a>     |
| <a href="#">serine protease autotransporter toxin Sat [Escherichia coli]</a>                            | 2627  | 0.0     | <a href="#">RRN06535</a>     |
| <a href="#">serine protease autotransporter toxin Sat [Escherichia coli]</a>                            | 2627  | 0.0     | <a href="#">HAH0224241</a>   |
| <a href="#">serine protease autotransporter toxin Sat [Escherichia coli]</a>                            | 2627  | 0.0     | <a href="#">HAH4727320</a>   |
| <a href="#">serine protease autotransporter toxin Sat [Escherichia coli]</a>                            | 2627  | 0.0     | <a href="#">HAX8501378</a>   |
| <a href="#">serine protease autotransporter toxin Sat [Escherichia coli]</a>                            | 2627  | 0.0     | <a href="#">HBC8781562</a>   |
| <a href="#">serine protease autotransporter toxin Sat [Escherichia coli]</a>                            | 2627  | 0.0     | <a href="#">WP_049074636</a> |
| <a href="#">serine protease autotransporter toxin Sat [Escherichia coli]</a>                            | 2627  | 0.0     | <a href="#">WP_023150719</a> |
| <a href="#">serine protease autotransporter toxin Sat [Escherichia coli]</a>                            | 2627  | 0.0     | <a href="#">WP_021521406</a> |
| <a href="#">serine protease autotransporter toxin Sat [Escherichia coli]</a>                            | 2627  | 0.0     | <a href="#">KAA2076204</a>   |
| <a href="#">serine protease autotransporter toxin Sat [Escherichia coli]</a>                            | 2627  | 0.0     | <a href="#">KAA2105643</a>   |
| <a href="#">serine protease autotransporter toxin Sat [Escherichia coli]</a>                            | 2627  | 0.0     | <a href="#">KAA2126002</a>   |
| <a href="#">serine protease autotransporter toxin Sat [Escherichia coli]</a>                            | 2627  | 0.0     | <a href="#">MBB0983140</a>   |
| <a href="#">serine protease autotransporter toxin Sat [Escherichia coli]</a>                            | 2627  | 0.0     | <a href="#">MBB0498836</a>   |
| <a href="#">serine protease autotransporter toxin Sat [Escherichia coli]</a>                            | 2627  | 0.0     | <a href="#">HAP0967861</a>   |
| <a href="#">serine protease autotransporter toxin Sat [Escherichia coli]</a>                            | 2627  | 0.0     | <a href="#">HAX6362869</a>   |
| <a href="#">serine protease autotransporter toxin Sat [Escherichia coli]</a>                            | 2627  | 0.0     | <a href="#">HAX6372935</a>   |
| <a href="#">serine protease autotransporter toxin Sat [Escherichia coli]</a>                            | 2627  | 0.0     | <a href="#">HAX6427584</a>   |
| <a href="#">serine protease autotransporter toxin Sat [Escherichia coli]</a>                            | 2627  | 0.0     | <a href="#">WP_149846178</a> |
| <a href="#">serine protease autotransporter toxin Sat [Escherichia coli]</a>                            | 2627  | 0.0     | <a href="#">EHR8537703</a>   |
| <a href="#">serine protease autotransporter toxin Sat [Escherichia coli]</a>                            | 2627  | 0.0     | <a href="#">KAA2152962</a>   |
| <a href="#">serine protease autotransporter toxin Sat [Escherichia coli]</a>                            | 2627  | 0.0     | <a href="#">HAK9473061</a>   |
| <a href="#">serine protease autotransporter toxin Sat [Escherichia coli]</a>                            | 2627  | 0.0     | <a href="#">WP_060667427</a> |
| <a href="#">autotransporter outer membrane beta-barrel domain-containing protein [Escherichia coli]</a> | 2627  | 0.0     | <a href="#">ALT50789</a>     |
| <a href="#">serine protease autotransporter toxin Sat [Escherichia coli]</a>                            | 2627  | 0.0     | <a href="#">HBI9439922</a>   |
| <a href="#">serine protease autotransporter toxin Sat [Escherichia coli]</a>                            | 2627  | 0.0     | <a href="#">HBI7936509</a>   |
| <a href="#">autotransporter outer membrane beta-barrel domain-containing protein [Escherichia coli]</a> | 2627  | 0.0     | <a href="#">WP_225394784</a> |
| <a href="#">serine protease autotransporter toxin Sat [Escherichia coli]</a>                            | 2627  | 0.0     | <a href="#">EFT4571186</a>   |
| <a href="#">serine protease autotransporter toxin Sat [Escherichia coli]</a>                            | 2627  | 0.0     | <a href="#">EHC2729660</a>   |
| <a href="#">serine protease autotransporter toxin Sat [Escherichia coli]</a>                            | 2627  | 0.0     | <a href="#">HAZ4666781</a>   |
| <a href="#">serine protease autotransporter toxin Sat [Escherichia coli]</a>                            | 2627  | 0.0     | <a href="#">HBA1319342</a>   |
| <a href="#">serine protease autotransporter toxin Sat [Escherichia coli]</a>                            | 2627  | 0.0     | <a href="#">HBC7154477</a>   |
| <a href="#">serine protease autotransporter toxin Sat [Escherichia coli]</a>                            | 2627  | 0.0     | <a href="#">HBD2195500</a>   |
| <a href="#">serine protease autotransporter toxin Sat [Escherichia coli]</a>                            | 2627  | 0.0     | <a href="#">HAI5392434</a>   |
| <a href="#">serine protease autotransporter toxin Sat [Escherichia coli]</a>                            | 2627  | 0.0     | <a href="#">HAL3252735</a>   |
| <a href="#">serine protease autotransporter toxin Sat [Escherichia coli]</a>                            | 2627  | 0.0     | <a href="#">HAX5825434</a>   |
| <a href="#">serine protease autotransporter toxin Sat [Escherichia coli]</a>                            | 2627  | 0.0     | <a href="#">HAY0853007</a>   |
| <a href="#">serine protease autotransporter toxin Sat [Escherichia coli]</a>                            | 2627  | 0.0     | <a href="#">HAY2236716</a>   |
| <a href="#">serine protease autotransporter toxin Sat [Escherichia coli]</a>                            | 2627  | 0.0     | <a href="#">HAY3259201</a>   |
| <a href="#">serine protease autotransporter toxin Sat [Escherichia coli]</a>                            | 2627  | 0.0     | <a href="#">WP_139837327</a> |
| <a href="#">autotransporter outer membrane beta-barrel domain-containing protein [Escherichia coli]</a> | 2627  | 0.0     | <a href="#">OSY85009</a>     |
| <a href="#">serine protease autotransporter toxin Sat [Escherichia coli]</a>                            | 2627  | 0.0     | <a href="#">HAL1710508</a>   |
| <a href="#">serine protease autotransporter toxin Sat [Escherichia coli]</a>                            | 2627  | 0.0     | <a href="#">WP_053901632</a> |
| <a href="#">serine protease autotransporter toxin Sat [Escherichia coli]</a>                            | 2627  | 0.0     | <a href="#">EEV5815857</a>   |
| <a href="#">serine protease autotransporter toxin Sat [Escherichia coli]</a>                            | 2627  | 0.0     | <a href="#">EGG1101312</a>   |
| <a href="#">serine protease autotransporter toxin Sat [Escherichia coli]</a>                            | 2627  | 0.0     | <a href="#">NJY07520</a>     |
| <a href="#">serine protease autotransporter toxin Sat [Escherichia coli]</a>                            | 2627  | 0.0     | <a href="#">TXQ35066</a>     |
| <a href="#">serine protease autotransporter toxin Sat [Escherichia coli]</a>                            | 2627  | 0.0     | <a href="#">HAI3750294</a>   |
| <a href="#">serine protease autotransporter toxin Sat [Escherichia coli]</a>                            | 2627  | 0.0     | <a href="#">WP_113956116</a> |
| <a href="#">serine protease autotransporter toxin Sat [Escherichia coli]</a>                            | 2627  | 0.0     | <a href="#">HAY5190267</a>   |
| <a href="#">serine protease autotransporter toxin Sat [Escherichia coli]</a>                            | 2627  | 0.0     | <a href="#">MBS8788038</a>   |
| <a href="#">serine protease autotransporter toxin Sat [Escherichia coli]</a>                            | 2627  | 0.0     | <a href="#">WP_064232224</a> |

| Description                                                                                             | Score | E value | Accession                    |
|---------------------------------------------------------------------------------------------------------|-------|---------|------------------------------|
| <a href="#">autotransporter [Escherichia coli]</a>                                                      | 2627  | 0.0     | <a href="#">OAO63702</a>     |
| <a href="#">serine protease autotransporter toxin Sat [Escherichia coli]</a>                            | 2627  | 0.0     | <a href="#">WP_118909407</a> |
| <a href="#">serine protease autotransporter toxin Sat [Escherichia coli]</a>                            | 2627  | 0.0     | <a href="#">EGO3591555</a>   |
| <a href="#">serine protease autotransporter toxin Sat [Escherichia coli]</a>                            | 2627  | 0.0     | <a href="#">NBE40572</a>     |
| <a href="#">serine protease autotransporter toxin Sat [Escherichia coli]</a>                            | 2627  | 0.0     | <a href="#">HAJ5426127</a>   |
| <a href="#">serine protease autotransporter toxin Sat [Escherichia coli]</a>                            | 2627  | 0.0     | <a href="#">HBB6117255</a>   |
| <a href="#">serine protease autotransporter toxin Sat [Escherichia coli]</a>                            | 2627  | 0.0     | <a href="#">WP_115766409</a> |
| <a href="#">serine protease autotransporter toxin Sat [Escherichia coli]</a>                            | 2627  | 0.0     | <a href="#">WP_001611046</a> |
| <a href="#">serine protease autotransporter toxin Sat [Escherichia coli]</a>                            | 2627  | 0.0     | <a href="#">EFD0420853</a>   |
| <a href="#">serine protease autotransporter toxin Sat [Escherichia coli]</a>                            | 2627  | 0.0     | <a href="#">EFE3323826</a>   |
| <a href="#">serine protease autotransporter toxin Sat [Escherichia coli]</a>                            | 2627  | 0.0     | <a href="#">EFE3353236</a>   |
| <a href="#">serine protease autotransporter toxin Sat [Escherichia coli]</a>                            | 2627  | 0.0     | <a href="#">EFH2673541</a>   |
| <a href="#">serine protease autotransporter toxin Sat [Escherichia coli]</a>                            | 2627  | 0.0     | <a href="#">EFH5306495</a>   |
| <a href="#">serine protease autotransporter toxin Sat [Escherichia coli]</a>                            | 2627  | 0.0     | <a href="#">HBC4963495</a>   |
| <a href="#">serine protease autotransporter toxin Sat [Escherichia coli]</a>                            | 2627  | 0.0     | <a href="#">EFH8304360</a>   |
| <a href="#">serine protease autotransporter toxin Sat [Escherichia coli]</a>                            | 2627  | 0.0     | <a href="#">MBI9242867</a>   |
| <a href="#">serine protease autotransporter toxin Sat [Escherichia coli]</a>                            | 2627  | 0.0     | <a href="#">HAP1192552</a>   |
| <a href="#">serine protease autotransporter toxin Sat [Escherichia coli]</a>                            | 2627  | 0.0     | <a href="#">HAM4370941</a>   |
| <a href="#">serine protease autotransporter toxin Sat [Escherichia coli]</a>                            | 2627  | 0.0     | <a href="#">HAO0429778</a>   |
| <a href="#">serine protease autotransporter toxin Sat [Escherichia coli]</a>                            | 2627  | 0.0     | <a href="#">WP_059319927</a> |
| <a href="#">autotransporter outer membrane beta-barrel domain-containing protein [Escherichia coli]</a> | 2627  | 0.0     | <a href="#">KUX86724</a>     |
| <a href="#">serine protease autotransporter toxin Sat [Escherichia coli]</a>                            | 2627  | 0.0     | <a href="#">WP_113495884</a> |
| <a href="#">serine protease EspP [Escherichia coli]</a>                                                 | 2627  | 0.0     | <a href="#">GCN69540</a>     |
| <a href="#">serine protease EspP [Escherichia coli]</a>                                                 | 2627  | 0.0     | <a href="#">GCT45587</a>     |
| <a href="#">serine protease EspP [Escherichia coli]</a>                                                 | 2627  | 0.0     | <a href="#">GCY95461</a>     |
| <a href="#">serine protease EspP [Escherichia coli]</a>                                                 | 2627  | 0.0     | <a href="#">GDB27613</a>     |
| <a href="#">serine protease EspP [Escherichia coli]</a>                                                 | 2627  | 0.0     | <a href="#">GDC05953</a>     |
| <a href="#">serine protease autotransporter toxin Sat [Escherichia coli]</a>                            | 2627  | 0.0     | <a href="#">WP_116991798</a> |
| <a href="#">serine protease autotransporter toxin Sat [Escherichia coli]</a>                            | 2627  | 0.0     | <a href="#">MBB0806913</a>   |
| <a href="#">serine protease autotransporter toxin Sat [Escherichia coli]</a>                            | 2627  | 0.0     | <a href="#">MBW2773060</a>   |
| <a href="#">serine protease autotransporter toxin Sat [Escherichia coli]</a>                            | 2627  | 0.0     | <a href="#">MRH27236</a>     |
| <a href="#">serine protease autotransporter toxin Sat [Escherichia coli]</a>                            | 2627  | 0.0     | <a href="#">NPJ79193</a>     |
| <a href="#">serine protease autotransporter toxin Sat, partial [Escherichia coli]</a>                   | 2627  | 0.0     | <a href="#">WP_140402642</a> |
| <a href="#">serine protease autotransporter toxin Sat [Escherichia coli]</a>                            | 2627  | 0.0     | <a href="#">WP_169783511</a> |
| <a href="#">serine protease autotransporter toxin Sat [Escherichia coli]</a>                            | 2627  | 0.0     | <a href="#">EEY5188439</a>   |
| <a href="#">serine protease autotransporter toxin Sat [Escherichia coli]</a>                            | 2627  | 0.0     | <a href="#">EFC2077216</a>   |
| <a href="#">serine protease autotransporter toxin Sat [Escherichia coli]</a>                            | 2627  | 0.0     | <a href="#">HAG7649195</a>   |
| <a href="#">serine protease autotransporter toxin Sat [Escherichia coli]</a>                            | 2627  | 0.0     | <a href="#">HBB1193796</a>   |
| <a href="#">serine protease autotransporter toxin Sat [Escherichia coli]</a>                            | 2627  | 0.0     | <a href="#">WP_181203932</a> |
| <a href="#">serine protease autotransporter toxin Sat [Escherichia coli]</a>                            | 2627  | 0.0     | <a href="#">EIQ6130730</a>   |
| <a href="#">serine protease autotransporter toxin Sat [Escherichia coli]</a>                            | 2627  | 0.0     | <a href="#">EIQ6311371</a>   |
| <a href="#">serine protease autotransporter toxin Sat [Escherichia coli]</a>                            | 2627  | 0.0     | <a href="#">EIQ6352661</a>   |
| <a href="#">serine protease autotransporter toxin Sat [Escherichia coli]</a>                            | 2627  | 0.0     | <a href="#">EIQ6386402</a>   |
| <a href="#">serine protease autotransporter toxin Sat [Escherichia coli]</a>                            | 2627  | 0.0     | <a href="#">EIQ6395996</a>   |
| <a href="#">serine protease autotransporter toxin Sat [Escherichia coli]</a>                            | 2627  | 0.0     | <a href="#">HAH6736077</a>   |
| <a href="#">serine protease autotransporter toxin Sat [Escherichia coli]</a>                            | 2627  | 0.0     | <a href="#">HAN3395805</a>   |
| <a href="#">serine protease autotransporter toxin Sat [Escherichia coli]</a>                            | 2627  | 0.0     | <a href="#">HAO7397004</a>   |
| <a href="#">serine protease autotransporter toxin Sat [Escherichia coli]</a>                            | 2627  | 0.0     | <a href="#">HAI3867277</a>   |
| <a href="#">serine protease autotransporter toxin Sat [Escherichia coli]</a>                            | 2627  | 0.0     | <a href="#">HBA4320359</a>   |
| <a href="#">serine protease autotransporter toxin Sat [Escherichia coli]</a>                            | 2627  | 0.0     | <a href="#">HAG9275443</a>   |
| <a href="#">serine protease autotransporter toxin Sat [Escherichia coli]</a>                            | 2627  | 0.0     | <a href="#">WP_155951915</a> |
| <a href="#">serine protease autotransporter toxin Sat [Escherichia coli]</a>                            | 2627  | 0.0     | <a href="#">HAZ5813250</a>   |
| <a href="#">autotransporter outer membrane beta-barrel domain-containing protein [Escherichia coli]</a> | 2627  | 0.0     | <a href="#">WP_225390149</a> |
| <a href="#">autotransporter outer membrane beta-barrel domain-containing protein [Escherichia coli]</a> | 2627  | 0.0     | <a href="#">WP_217822457</a> |
| <a href="#">serine protease autotransporter toxin Sat [Escherichia coli]</a>                            | 2627  | 0.0     | <a href="#">MBV5228177</a>   |
| <a href="#">serine protease autotransporter toxin Sat [Escherichia coli]</a>                            | 2627  | 0.0     | <a href="#">MBV5233005</a>   |
| <a href="#">serine protease autotransporter toxin Sat [Escherichia coli]</a>                            | 2627  | 0.0     | <a href="#">HAM6401014</a>   |
| <a href="#">serine protease autotransporter toxin Sat [Escherichia coli]</a>                            | 2627  | 0.0     | <a href="#">WP_094316666</a> |
| <a href="#">serine protease autotransporter toxin Sat [Escherichia coli]</a>                            | 2627  | 0.0     | <a href="#">EFK3996975</a>   |
| <a href="#">serine protease autotransporter toxin Sat [Escherichia coli]</a>                            | 2627  | 0.0     | <a href="#">EI2859423</a>    |
| <a href="#">serine protease autotransporter toxin Sat [Escherichia coli]</a>                            | 2627  | 0.0     | <a href="#">MBJ7038041</a>   |
| <a href="#">serine protease autotransporter toxin Sat [Escherichia coli]</a>                            | 2627  | 0.0     | <a href="#">MBJ7117004</a>   |
| <a href="#">autotransporter outer membrane beta-barrel domain-containing protein [Escherichia coli]</a> | 2627  | 0.0     | <a href="#">OOI11196</a>     |

| Description                                                                                                | Score | E value | Accession                    |
|------------------------------------------------------------------------------------------------------------|-------|---------|------------------------------|
| <a href="#">serine protease autotransporter toxin Sat [Escherichia coli]</a>                               | 2627  | 0.0     | <a href="#">MBB0854235</a>   |
| <a href="#">serine protease autotransporter toxin Sat [Escherichia coli]</a>                               | 2627  | 0.0     | <a href="#">NPP26331</a>     |
| <a href="#">autotransporter outer membrane beta-barrel domain-containing protein [Escherichia coli]</a>    | 2627  | 0.0     | <a href="#">WP_199351549</a> |
| <a href="#">serine protease autotransporter toxin Sat [Escherichia coli]</a>                               | 2627  | 0.0     | <a href="#">MBJ6819672</a>   |
| <a href="#">serine protease autotransporter toxin Sat [Escherichia coli]</a>                               | 2627  | 0.0     | <a href="#">HBA1072022</a>   |
| <a href="#">autotransporter outer membrane beta-barrel domain-containing protein [Escherichia coli]</a>    | 2627  | 0.0     | <a href="#">OSP32553</a>     |
| <a href="#">autotransporter outer membrane beta-barrel domain-containing protein [Escherichia coli]</a>    | 2627  | 0.0     | <a href="#">TFA22384</a>     |
| <a href="#">serine protease autotransporter toxin Sat [Escherichia coli]</a>                               | 2627  | 0.0     | <a href="#">HBD2267896</a>   |
| <a href="#">serine protease autotransporter toxin Sat [Escherichia coli]</a>                               | 2627  | 0.0     | <a href="#">HAX7888640</a>   |
| <a href="#">serine protease autotransporter toxin Sat [Escherichia coli]</a>                               | 2627  | 0.0     | <a href="#">HAL3865995</a>   |
| <a href="#">serine protease autotransporter toxin Sat [Escherichia coli]</a>                               | 2627  | 0.0     | <a href="#">HBA4313454</a>   |
| <a href="#">serine protease autotransporter toxin Sat [Escherichia coli]</a>                               | 2627  | 0.0     | <a href="#">WP_048228344</a> |
| <a href="#">serine protease autotransporter toxin Sat [Escherichia coli]</a>                               | 2627  | 0.0     | <a href="#">EFC8865612</a>   |
| <a href="#">serine protease autotransporter toxin Sat [Escherichia coli]</a>                               | 2627  | 0.0     | <a href="#">EFK8052655</a>   |
| <a href="#">serine protease autotransporter toxin Sat [Escherichia coli]</a>                               | 2627  | 0.0     | <a href="#">EFK8062124</a>   |
| <a href="#">serine protease sat autotransporter [Escherichia coli]</a>                                     | 2627  | 0.0     | <a href="#">KLX21102</a>     |
| <a href="#">serine protease sat autotransporter [Escherichia coli]</a>                                     | 2627  | 0.0     | <a href="#">KLX31217</a>     |
| <a href="#">serine protease autotransporter toxin Sat [Escherichia coli]</a>                               | 2627  | 0.0     | <a href="#">HBM2060318</a>   |
| <a href="#">serine protease autotransporter toxin Sat [Escherichia coli]</a>                               | 2627  | 0.0     | <a href="#">HBM2138067</a>   |
| <a href="#">serine protease autotransporter toxin Sat [Escherichia coli]</a>                               | 2627  | 0.0     | <a href="#">HBM2195022</a>   |
| <a href="#">serine protease autotransporter toxin Sat [Escherichia coli]</a>                               | 2627  | 0.0     | <a href="#">HBM2204591</a>   |
| <a href="#">serine protease autotransporter toxin Sat [Escherichia coli]</a>                               | 2627  | 0.0     | <a href="#">HBM2228563</a>   |
| <a href="#">serine protease autotransporter toxin Sat [Escherichia coli]</a>                               | 2627  | 0.0     | <a href="#">HAJ3750798</a>   |
| <a href="#">serine protease autotransporter toxin Sat [Escherichia coli]</a>                               | 2627  | 0.0     | <a href="#">HBC6041500</a>   |
| <a href="#">serine protease autotransporter toxin Sat [Escherichia coli]</a>                               | 2627  | 0.0     | <a href="#">MSI96964</a>     |
| <a href="#">serine protease autotransporter toxin Sat [Escherichia coli]</a>                               | 2627  | 0.0     | <a href="#">MBI9784956</a>   |
| <a href="#">serine protease autotransporter toxin Sat [Escherichia coli]</a>                               | 2627  | 0.0     | <a href="#">WP_181199831</a> |
| <a href="#">serine protease autotransporter toxin Sat [Escherichia coli]</a>                               | 2627  | 0.0     | <a href="#">MBA1707390</a>   |
| <a href="#">serine protease autotransporter toxin Sat [Escherichia coli]</a>                               | 2627  | 0.0     | <a href="#">HBE4050048</a>   |
| <a href="#">serine protease autotransporter toxin Sat [Escherichia coli]</a>                               | 2627  | 0.0     | <a href="#">HBK1370968</a>   |
| Escherichia coli O1 [enterobacteria ]                                                                      |       |         |                              |
| <a href="#">serine protease autotransporter toxin Sat [Escherichia coli O1]</a>                            | 2631  | 0.0     | <a href="#">EEZ6060212</a>   |
| Shigella flexneri [enterobacteria ]                                                                        |       |         |                              |
| <a href="#">serine protease autotransporter toxin Sat [Shigella flexneri]</a>                              | 2631  | 0.0     | <a href="#">EFQ0017957</a>   |
| <a href="#">serine protease autotransporter toxin Sat [Shigella flexneri]</a>                              | 2629  | 0.0     | <a href="#">EFW2042547</a>   |
| <a href="#">serine protease autotransporter toxin Sat [Shigella flexneri]</a>                              | 2627  | 0.0     | <a href="#">EFP7778397</a>   |
| <a href="#">serine protease autotransporter toxin Sat [Shigella flexneri]</a>                              | 2627  | 0.0     | <a href="#">EFX2165787</a>   |
| <a href="#">serine protease autotransporter toxin Sat [Shigella flexneri]</a>                              | 2627  | 0.0     | <a href="#">HAY5193548</a>   |
| <a href="#">serine protease autotransporter toxin Sat [Shigella flexneri]</a>                              | 2627  | 0.0     | <a href="#">HAY5252721</a>   |
| <a href="#">serine protease autotransporter toxin Sat [Shigella flexneri]</a>                              | 2627  | 0.0     | <a href="#">HAY7194005</a>   |
| Shigella boydii [enterobacteria ]                                                                          |       |         |                              |
| <a href="#">serine protease autotransporter toxin Sat [Shigella boydii]</a>                                | 2631  | 0.0     | <a href="#">EIH0344184</a>   |
| <a href="#">serine protease autotransporter toxin Sat [Shigella boydii]</a>                                | 2627  | 0.0     | <a href="#">EFX6129646</a>   |
| Shigella sp. FC2045 [enterobacteria ]                                                                      |       |         |                              |
| <a href="#">autotransporter outer membrane beta-barrel domain-containing protein [Shigella sp. FC2045]</a> | 2631  | 0.0     | <a href="#">ODG72079</a>     |
| Shigella sp. FC2928 [enterobacteria ]                                                                      |       |         |                              |
| <a href="#">autotransporter outer membrane beta-barrel domain-containing protein [Shigella sp. FC2928]</a> | 2631  | 0.0     | <a href="#">ODG78167</a>     |
| Escherichia coli UMEA 3899-1 [enterobacteria ]                                                             |       |         |                              |
| <a href="#">serine protease sat autotransporter [Escherichia coli UMEA 3899-1]</a>                         | 2629  | 0.0     | <a href="#">ERA44834</a>     |
| Enterobacteriaceae [enterobacteria ]                                                                       |       |         |                              |
| <b>MULTISPECIES: serine protease autotransporter toxin Sat [Enterobacteriaceae]</b>                        | 2629  | 0.0     | <a href="#">WP_126896457</a> |
| <b>MULTISPECIES: serine protease autotransporter toxin Sat [Enterobacteriaceae]</b>                        | 2629  | 0.0     | <a href="#">WP_001034083</a> |
| Escherichia coli O39:H4 [enterobacteria ]                                                                  |       |         |                              |
| <a href="#">serine protease autotransporter toxin Sat [Escherichia coli O39:H4]</a>                        | 2629  | 0.0     | <a href="#">EFA8806175</a>   |
| Escherichia coli O157:H7 [enterobacteria ]                                                                 |       |         |                              |
| <a href="#">serine protease autotransporter toxin Sat [Escherichia coli O157:H7]</a>                       | 2629  | 0.0     | <a href="#">EFD1460826</a>   |
| Escherichia coli O25 [enterobacteria ]                                                                     |       |         |                              |
| <a href="#">serine protease autotransporter toxin Sat [Escherichia coli O25]</a>                           | 2629  | 0.0     | <a href="#">EFN8566480</a>   |
| Shigella sonnei [enterobacteria ]                                                                          |       |         |                              |
| <a href="#">serine protease autotransporter toxin Sat [Shigella sonnei]</a>                                | 2629  | 0.0     | <a href="#">EFZ4857089</a>   |
| <a href="#">serine protease autotransporter toxin Sat [Shigella sonnei]</a>                                | 2628  | 0.0     | <a href="#">EHI3940979</a>   |
| Escherichia coli IS35 [enterobacteria ]                                                                    |       |         |                              |
| <a href="#">Per-activated serine protease autotransporter enterotoxin EspC [Escherichia coli IS35]</a>     | 2629  | 0.0     | <a href="#">CDL05232</a>     |

| Description                                                                                     | Score | E value | Accession                  |
|-------------------------------------------------------------------------------------------------|-------|---------|----------------------------|
| Escherichia coli UMEA 3252-1 [enterobacteria ]                                                  |       |         |                            |
| <a href="#">serine protease autotransporter toxin Sat [Escherichia coli UMEA 3252-1]</a>        | 2629  | 0.0     | <a href="#">HAJ6400147</a> |
| Escherichia coli HVH 93 (4-5851025) [enterobacteria ]                                           |       |         |                            |
| <a href="#">serine protease autotransporter toxin Sat [Escherichia coli HVH 93 (4-5851025)]</a> | 2629  | 0.0     | <a href="#">HAJ6409752</a> |
| Escherichia coli KN1604 [enterobacteria ]                                                       |       |         |                            |
| <a href="#">serine protease autotransporter toxin Sat [Escherichia coli KN1604]</a>             | 2629  | 0.0     | <a href="#">HAX0006506</a> |
| Escherichia coli MH5800 [enterobacteria ]                                                       |       |         |                            |
| <a href="#">serine protease autotransporter toxin Sat [Escherichia coli MH5800]</a>             | 2629  | 0.0     | <a href="#">HAX0016325</a> |
| Escherichia coli JJ2657 [enterobacteria ]                                                       |       |         |                            |
| <a href="#">serine protease autotransporter toxin Sat [Escherichia coli JJ2657]</a>             | 2629  | 0.0     | <a href="#">HAX0021232</a> |
| Escherichia coli JJ2608 [enterobacteria ]                                                       |       |         |                            |
| <a href="#">serine protease autotransporter toxin Sat [Escherichia coli JJ2608]</a>             | 2629  | 0.0     | <a href="#">HAX0025986</a> |
| Escherichia coli JJ2555 [enterobacteria ]                                                       |       |         |                            |
| <a href="#">serine protease autotransporter toxin Sat [Escherichia coli JJ2555]</a>             | 2629  | 0.0     | <a href="#">HAX0030327</a> |
| Escherichia coli JJ2550 [enterobacteria ]                                                       |       |         |                            |
| <a href="#">serine protease autotransporter toxin Sat [Escherichia coli JJ2550]</a>             | 2629  | 0.0     | <a href="#">HAX0035654</a> |
| Escherichia coli JJ2578 [enterobacteria ]                                                       |       |         |                            |
| <a href="#">serine protease autotransporter toxin Sat [Escherichia coli JJ2578]</a>             | 2629  | 0.0     | <a href="#">HAX0040618</a> |
| Escherichia coli JJ2528 [enterobacteria ]                                                       |       |         |                            |
| <a href="#">serine protease autotransporter toxin Sat [Escherichia coli JJ2528]</a>             | 2629  | 0.0     | <a href="#">HAX0045758</a> |
| Escherichia coli JJ2508 [enterobacteria ]                                                       |       |         |                            |
| <a href="#">serine protease autotransporter toxin Sat [Escherichia coli JJ2508]</a>             | 2629  | 0.0     | <a href="#">HAX0055499</a> |
| Escherichia coli JJ2444 [enterobacteria ]                                                       |       |         |                            |
| <a href="#">serine protease autotransporter toxin Sat [Escherichia coli JJ2444]</a>             | 2629  | 0.0     | <a href="#">HAX0060482</a> |
| Escherichia coli ZH063 [enterobacteria ]                                                        |       |         |                            |
| <a href="#">serine protease autotransporter toxin Sat [Escherichia coli ZH063]</a>              | 2629  | 0.0     | <a href="#">HAX0075156</a> |
| Escherichia coli ZH071 [enterobacteria ]                                                        |       |         |                            |
| <a href="#">serine protease autotransporter toxin Sat [Escherichia coli ZH071]</a>              | 2629  | 0.0     | <a href="#">HAX0079826</a> |
| Escherichia coli CD340 [enterobacteria ]                                                        |       |         |                            |
| <a href="#">serine protease autotransporter toxin Sat [Escherichia coli CD340]</a>              | 2629  | 0.0     | <a href="#">HAX0084719</a> |
| Escherichia coli ZH164 [enterobacteria ]                                                        |       |         |                            |
| <a href="#">serine protease autotransporter toxin Sat [Escherichia coli ZH164]</a>              | 2629  | 0.0     | <a href="#">HAX0089459</a> |
| Escherichia coli U024 [enterobacteria ]                                                         |       |         |                            |
| <a href="#">serine protease autotransporter toxin Sat [Escherichia coli U024]</a>               | 2629  | 0.0     | <a href="#">HAX0099239</a> |
| Escherichia coli U004 [enterobacteria ]                                                         |       |         |                            |
| <a href="#">serine protease autotransporter toxin Sat [Escherichia coli U004]</a>               | 2629  | 0.0     | <a href="#">HAX0104929</a> |
| Escherichia coli SaT158 [enterobacteria ]                                                       |       |         |                            |
| <a href="#">serine protease autotransporter toxin Sat [Escherichia coli SaT158]</a>             | 2629  | 0.0     | <a href="#">HAX0113730</a> |
| Escherichia coli SaT040 [enterobacteria ]                                                       |       |         |                            |
| <a href="#">serine protease autotransporter toxin Sat [Escherichia coli SaT040]</a>             | 2629  | 0.0     | <a href="#">HAX0127979</a> |
| Escherichia coli SaT049 [enterobacteria ]                                                       |       |         |                            |
| <a href="#">serine protease autotransporter toxin Sat [Escherichia coli SaT049]</a>             | 2629  | 0.0     | <a href="#">HAX0132629</a> |
| Escherichia coli MVASt179 [enterobacteria ]                                                     |       |         |                            |
| <a href="#">serine protease autotransporter toxin Sat [Escherichia coli MVASt179]</a>           | 2629  | 0.0     | <a href="#">HAX0137439</a> |
| Escherichia coli MVASt131 [enterobacteria ]                                                     |       |         |                            |
| <a href="#">serine protease autotransporter toxin Sat [Escherichia coli MVASt131]</a>           | 2629  | 0.0     | <a href="#">HAX0151890</a> |
| Escherichia coli JJ2038 [enterobacteria ]                                                       |       |         |                            |
| <a href="#">serine protease autotransporter toxin Sat [Escherichia coli JJ2038]</a>             | 2629  | 0.0     | <a href="#">HAX0156531</a> |
| Escherichia coli JJ2183 [enterobacteria ]                                                       |       |         |                            |
| <a href="#">serine protease autotransporter toxin Sat [Escherichia coli JJ2183]</a>             | 2629  | 0.0     | <a href="#">HAX0165804</a> |
| Escherichia coli MVASt084 [enterobacteria ]                                                     |       |         |                            |
| <a href="#">serine protease autotransporter toxin Sat [Escherichia coli MVASt084]</a>           | 2629  | 0.0     | <a href="#">HAX0170908</a> |
| Escherichia coli MVASt077 [enterobacteria ]                                                     |       |         |                            |
| <a href="#">serine protease autotransporter toxin Sat [Escherichia coli MVASt077]</a>           | 2629  | 0.0     | <a href="#">HAX0175195</a> |
| Escherichia coli JJ1908 [enterobacteria ]                                                       |       |         |                            |
| <a href="#">serine protease autotransporter toxin Sat [Escherichia coli JJ1908]</a>             | 2629  | 0.0     | <a href="#">HAX0180480</a> |
| Escherichia coli JJ2050 [enterobacteria ]                                                       |       |         |                            |
| <a href="#">serine protease autotransporter toxin Sat [Escherichia coli JJ2050]</a>             | 2629  | 0.0     | <a href="#">HAX0185188</a> |
| Escherichia coli JJ2193 [enterobacteria ]                                                       |       |         |                            |
| <a href="#">serine protease autotransporter toxin Sat [Escherichia coli JJ2193]</a>             | 2629  | 0.0     | <a href="#">HAX0190116</a> |
| Escherichia coli JJ2643 [enterobacteria ]                                                       |       |         |                            |
| <a href="#">serine protease autotransporter toxin Sat [Escherichia coli JJ2643]</a>             | 2629  | 0.0     | <a href="#">HAX0195145</a> |
| Escherichia coli JJ2016 [enterobacteria ]                                                       |       |         |                            |

| Description                                                                                                                                         | Score | E value | Accession                  |
|-----------------------------------------------------------------------------------------------------------------------------------------------------|-------|---------|----------------------------|
| <a href="#">serine protease autotransporter toxin Sat [Escherichia coli JJ2016]</a><br>Escherichia coli MVA038 [enterobacteria ]                    | 2629  | 0.0     | <a href="#">HAX0204896</a> |
| <a href="#">serine protease autotransporter toxin Sat [Escherichia coli MVA038]</a><br>Escherichia coli MVA046 [enterobacteria ]                    | 2629  | 0.0     | <a href="#">HAX0209492</a> |
| <a href="#">serine protease autotransporter toxin Sat [Escherichia coli MVA046]</a><br>Escherichia coli H061 [enterobacteria ]                      | 2629  | 0.0     | <a href="#">HAX0214131</a> |
| <a href="#">serine protease autotransporter toxin Sat [Escherichia coli H061]</a><br>Escherichia coli MVA014 [enterobacteria ]                      | 2629  | 0.0     | <a href="#">HAX0219297</a> |
| <a href="#">serine protease autotransporter toxin Sat [Escherichia coli MVA014]</a><br>Escherichia coli MVA0036 [enterobacteria ]                   | 2629  | 0.0     | <a href="#">HAX0224008</a> |
| <a href="#">serine protease autotransporter toxin Sat [Escherichia coli MVA0036]</a><br>Escherichia coli JJ1897 [enterobacteria ]                   | 2629  | 0.0     | <a href="#">HAX0238067</a> |
| <a href="#">serine protease autotransporter toxin Sat [Escherichia coli JJ1897]</a><br>Escherichia coli G213 [enterobacteria ]                      | 2629  | 0.0     | <a href="#">HAX0243615</a> |
| <a href="#">serine protease autotransporter toxin Sat [Escherichia coli G213]</a><br>Escherichia coli G132 [enterobacteria ]                        | 2629  | 0.0     | <a href="#">HAX0253346</a> |
| <a href="#">serine protease autotransporter toxin Sat [Escherichia coli G132]</a><br>Escherichia coli JJ1901 [enterobacteria ]                      | 2629  | 0.0     | <a href="#">HAX0258172</a> |
| <a href="#">serine protease autotransporter toxin Sat [Escherichia coli JJ1901]</a><br>Escherichia coli H016 [enterobacteria ]                      | 2629  | 0.0     | <a href="#">HAX0267967</a> |
| <a href="#">serine protease autotransporter toxin Sat [Escherichia coli H016]</a><br>Escherichia coli G150 [enterobacteria ]                        | 2629  | 0.0     | <a href="#">HAX0277630</a> |
| <a href="#">serine protease autotransporter toxin Sat [Escherichia coli G150]</a><br>Escherichia coli CU758 [enterobacteria ]                       | 2629  | 0.0     | <a href="#">HAX0282361</a> |
| <a href="#">serine protease autotransporter toxin Sat [Escherichia coli CU758]</a><br>Escherichia coli H003 [enterobacteria ]                       | 2629  | 0.0     | <a href="#">HAX0287392</a> |
| <a href="#">serine protease autotransporter toxin Sat [Escherichia coli H003]</a><br>Escherichia coli H006 [enterobacteria ]                        | 2629  | 0.0     | <a href="#">HAX0292018</a> |
| <a href="#">serine protease autotransporter toxin Sat [Escherichia coli H006]</a><br>Escherichia coli CD400 [enterobacteria ]                       | 2629  | 0.0     | <a href="#">HAX0306524</a> |
| <a href="#">serine protease autotransporter toxin Sat [Escherichia coli CD400]</a><br>Escherichia coli C001 [enterobacteria ]                       | 2629  | 0.0     | <a href="#">HAX0316414</a> |
| <a href="#">serine protease autotransporter toxin Sat [Escherichia coli C001]</a><br>Escherichia coli JJ2118 [enterobacteria ]                      | 2629  | 0.0     | <a href="#">HAX0325983</a> |
| <a href="#">serine protease autotransporter toxin Sat [Escherichia coli JJ2118]</a><br>Escherichia coli JJ2134 [enterobacteria ]                    | 2629  | 0.0     | <a href="#">HAX0345117</a> |
| <a href="#">serine protease autotransporter toxin Sat [Escherichia coli JJ2134]</a><br>Escherichia coli JJ2547 [enterobacteria ]                    | 2629  | 0.0     | <a href="#">HAX0349609</a> |
| <a href="#">serine protease autotransporter toxin Sat [Escherichia coli JJ2547]</a><br>Escherichia coli O157:H7 str. EC10 [enterobacteria ]         | 2629  | 0.0     | <a href="#">HAX5573027</a> |
| <a href="#">serine protease autotransporter toxin Sat [Escherichia coli O157:H7 str. EC10]</a><br>Escherichia coli VR50 [enterobacteria ]           | 2628  | 0.0     | <a href="#">HBA3504226</a> |
| <a href="#">secreted autotransporter toxin [Escherichia coli VR50]</a><br>Escherichia coli str. 'clone D i2' [enterobacteria ]                      | 2628  | 0.0     | <a href="#">AKA92116</a>   |
| <a href="#">Secreted auto transporter toxin [Escherichia coli str. 'clone D i2']</a><br>Escherichia coli str. 'clone D i14' [enterobacteria ]       | 2628  | 0.0     | <a href="#">AER85851</a>   |
| <a href="#">Secreted auto transporter toxin [Escherichia coli str. 'clone D i14']</a><br>Escherichia coli O25b:H4 [enterobacteria ]                 | 2628  | 0.0     | <a href="#">AER90770</a>   |
| <a href="#">eaaA [Escherichia coli O25b:H4]</a><br>Escherichia coli LAU-EC7 [enterobacteria ]                                                       | 2628  | 0.0     | <a href="#">ANK03324</a>   |
| <a href="#">autotransporter [Escherichia coli LAU-EC7]</a><br>Escherichia coli 1-250-04_S4_C2 [enterobacteria ]                                     | 2628  | 0.0     | <a href="#">ETE30666</a>   |
| <a href="#">serine protease sat autotransporter [Escherichia coli 1-250-04_S4_C2]</a><br>Escherichia coli 1-250-04_S4_C1 [enterobacteria ]          | 2628  | 0.0     | <a href="#">EZJ51354</a>   |
| <a href="#">serine protease sat autotransporter [Escherichia coli 1-250-04_S4_C1]</a><br>Escherichia coli KTE57 [enterobacteria ]                   | 2628  | 0.0     | <a href="#">EZJ63316</a>   |
| <a href="#">serine protease sat autotransporter [Escherichia coli KTE57]</a><br>Escherichia coli HVH 77 (4-2605759) [enterobacteria ]               | 2628  | 0.0     | <a href="#">ELE25072</a>   |
| <a href="#">serine protease sat autotransporter [Escherichia coli HVH 77 (4-2605759)]</a><br>Escherichia coli HVH 216 (4-3042952) [enterobacteria ] | 2628  | 0.0     | <a href="#">EQP64354</a>   |
| <a href="#">serine protease sat autotransporter [Escherichia coli HVH 216 (4-3042952)]</a><br>Escherichia coli 910096-2 [enterobacteria ]           | 2627  | 0.0     | <a href="#">EQU92710</a>   |
| <a href="#">serine protease sat autotransporter [Escherichia coli 910096-2]</a>                                                                     | 2627  | 0.0     | <a href="#">ESE27622</a>   |

| Description                                                                                | Score | E value | Accession                  |
|--------------------------------------------------------------------------------------------|-------|---------|----------------------------|
| Escherichia coli 1-110-08_S4_C1 [enterobacteria ]                                          |       |         |                            |
| <a href="#">serine protease sat autotransporter [Escherichia coli 1-110-08 S4 C1]</a>      | 2627  | 0.0     | <a href="#">EYE09558</a>   |
| Escherichia coli HVH 51 (4-2172526) [enterobacteria ]                                      |       |         |                            |
| <a href="#">serine protease sat autotransporter [Escherichia coli HVH 51 (4-2172526)]</a>  | 2627  | 0.0     | <a href="#">EQO90481</a>   |
| Escherichia coli O21 [enterobacteria ]                                                     |       |         |                            |
| <a href="#">serine protease autotransporter toxin Sat [Escherichia coli O21]</a>           | 2627  | 0.0     | <a href="#">EEZ6103770</a> |
| Escherichia coli G199 [enterobacteria ]                                                    |       |         |                            |
| <a href="#">serine protease autotransporter toxin Sat [Escherichia coli G199]</a>          | 2627  | 0.0     | <a href="#">HAX0263157</a> |
| Escherichia coli O25b:H4-ST131 [enterobacteria ]                                           |       |         |                            |
| <a href="#">serine protease autotransporter toxin Sat [Escherichia coli O25b:H4-ST131]</a> | 2627  | 0.0     | <a href="#">MBK3321699</a> |
| <a href="#">serine protease autotransporter toxin Sat [Escherichia coli O25b:H4-ST131]</a> | 2627  | 0.0     | <a href="#">MBK3326635</a> |
| <a href="#">serine protease autotransporter toxin Sat [Escherichia coli O25b:H4-ST131]</a> | 2627  | 0.0     | <a href="#">HAN3152878</a> |
| <a href="#">serine protease autotransporter toxin Sat [Escherichia coli O25b:H4-ST131]</a> | 2627  | 0.0     | <a href="#">HAN2555901</a> |
| <a href="#">serine protease autotransporter toxin Sat [Escherichia coli O25b:H4-ST131]</a> | 2627  | 0.0     | <a href="#">HAN2831583</a> |
| <a href="#">serine protease autotransporter toxin Sat [Escherichia coli O25b:H4-ST131]</a> | 2627  | 0.0     | <a href="#">HAO9828936</a> |
| Escherichia coli MVA158 [enterobacteria ]                                                  |       |         |                            |
| <a href="#">serine protease autotransporter toxin Sat [Escherichia coli MVA158]</a>        | 2627  | 0.0     | <a href="#">HAX0142153</a> |

## o Taxonomy

| Taxonomy                                            | Number of hits      | Number of Organisms | Description                                              |
|-----------------------------------------------------|---------------------|---------------------|----------------------------------------------------------|
| <a href="#">Enterobacterales</a>                    | <a href="#">292</a> | 82                  |                                                          |
| <a href="#">Enterobacteriaceae</a>                  | <a href="#">2</a>   | 82                  | <a href="#">Enterobacteriaceae hits</a>                  |
| <a href="#">Escherichia</a>                         | <a href="#">277</a> | 76                  |                                                          |
| <a href="#">Escherichia coli</a>                    | <a href="#">197</a> | 76                  | <a href="#">Escherichia coli hits</a>                    |
| <a href="#">Escherichia coli O1</a>                 | <a href="#">1</a>   | 1                   | <a href="#">Escherichia coli O1 hits</a>                 |
| <a href="#">Escherichia coli UMEA 3899-1</a>        | <a href="#">1</a>   | 1                   | <a href="#">Escherichia coli UMEA 3899-1 hits</a>        |
| <a href="#">Escherichia coli O39:H4</a>             | <a href="#">1</a>   | 1                   | <a href="#">Escherichia coli O39:H4 hits</a>             |
| <a href="#">Escherichia coli O157:H7</a>            | <a href="#">1</a>   | 2                   | <a href="#">Escherichia coli O157:H7 hits</a>            |
| <a href="#">Escherichia coli O157:H7 str. EC10</a>  | <a href="#">1</a>   | 1                   | <a href="#">Escherichia coli O157:H7 str. EC10 hits</a>  |
| <a href="#">Escherichia coli O25</a>                | <a href="#">1</a>   | 1                   | <a href="#">Escherichia coli O25 hits</a>                |
| <a href="#">Escherichia coli IS35</a>               | <a href="#">1</a>   | 1                   | <a href="#">Escherichia coli IS35 hits</a>               |
| <a href="#">Escherichia coli UMEA 3252-1</a>        | <a href="#">1</a>   | 1                   | <a href="#">Escherichia coli UMEA 3252-1 hits</a>        |
| <a href="#">Escherichia coli HVH 93 (4-5851025)</a> | <a href="#">1</a>   | 1                   | <a href="#">Escherichia coli HVH 93 (4-5851025) hits</a> |
| <a href="#">Escherichia coli KN1604</a>             | <a href="#">1</a>   | 1                   | <a href="#">Escherichia coli KN1604 hits</a>             |
| <a href="#">Escherichia coli MH5800</a>             | <a href="#">1</a>   | 1                   | <a href="#">Escherichia coli MH5800 hits</a>             |
| <a href="#">Escherichia coli JJ2657</a>             | <a href="#">1</a>   | 1                   | <a href="#">Escherichia coli JJ2657 hits</a>             |
| <a href="#">Escherichia coli JJ2608</a>             | <a href="#">1</a>   | 1                   | <a href="#">Escherichia coli JJ2608 hits</a>             |
| <a href="#">Escherichia coli JJ2555</a>             | <a href="#">1</a>   | 1                   | <a href="#">Escherichia coli JJ2555 hits</a>             |
| <a href="#">Escherichia coli JJ2550</a>             | <a href="#">1</a>   | 1                   | <a href="#">Escherichia coli JJ2550 hits</a>             |
| <a href="#">Escherichia coli JJ2578</a>             | <a href="#">1</a>   | 1                   | <a href="#">Escherichia coli JJ2578 hits</a>             |
| <a href="#">Escherichia coli JJ2528</a>             | <a href="#">1</a>   | 1                   | <a href="#">Escherichia coli JJ2528 hits</a>             |
| <a href="#">Escherichia coli JJ2508</a>             | <a href="#">1</a>   | 1                   | <a href="#">Escherichia coli JJ2508 hits</a>             |
| <a href="#">Escherichia coli JJ2444</a>             | <a href="#">1</a>   | 1                   | <a href="#">Escherichia coli JJ2444 hits</a>             |
| <a href="#">Escherichia coli ZH063</a>              | <a href="#">1</a>   | 1                   | <a href="#">Escherichia coli ZH063 hits</a>              |
| <a href="#">Escherichia coli ZH071</a>              | <a href="#">1</a>   | 1                   | <a href="#">Escherichia coli ZH071 hits</a>              |
| <a href="#">Escherichia coli CD340</a>              | <a href="#">1</a>   | 1                   | <a href="#">Escherichia coli CD340 hits</a>              |
| <a href="#">Escherichia coli ZH164</a>              | <a href="#">1</a>   | 1                   | <a href="#">Escherichia coli ZH164 hits</a>              |
| <a href="#">Escherichia coli U024</a>               | <a href="#">1</a>   | 1                   | <a href="#">Escherichia coli U024 hits</a>               |
| <a href="#">Escherichia coli U004</a>               | <a href="#">1</a>   | 1                   | <a href="#">Escherichia coli U004 hits</a>               |
| <a href="#">Escherichia coli SaT158</a>             | <a href="#">1</a>   | 1                   | <a href="#">Escherichia coli SaT158 hits</a>             |
| <a href="#">Escherichia coli SaT040</a>             | <a href="#">1</a>   | 1                   | <a href="#">Escherichia coli SaT040 hits</a>             |
| <a href="#">Escherichia coli SaT049</a>             | <a href="#">1</a>   | 1                   | <a href="#">Escherichia coli SaT049 hits</a>             |
| <a href="#">Escherichia coli MVA179</a>             | <a href="#">1</a>   | 1                   | <a href="#">Escherichia coli MVA179 hits</a>             |
| <a href="#">Escherichia coli MVA131</a>             | <a href="#">1</a>   | 1                   | <a href="#">Escherichia coli MVA131 hits</a>             |
| <a href="#">Escherichia coli JJ2038</a>             | <a href="#">1</a>   | 1                   | <a href="#">Escherichia coli JJ2038 hits</a>             |
| <a href="#">Escherichia coli JJ2183</a>             | <a href="#">1</a>   | 1                   | <a href="#">Escherichia coli JJ2183 hits</a>             |
| <a href="#">Escherichia coli MVA084</a>             | <a href="#">1</a>   | 1                   | <a href="#">Escherichia coli MVA084 hits</a>             |
| <a href="#">Escherichia coli MVA077</a>             | <a href="#">1</a>   | 1                   | <a href="#">Escherichia coli MVA077 hits</a>             |
| <a href="#">Escherichia coli JJ1908</a>             | <a href="#">1</a>   | 1                   | <a href="#">Escherichia coli JJ1908 hits</a>             |
| <a href="#">Escherichia coli JJ2050</a>             | <a href="#">1</a>   | 1                   | <a href="#">Escherichia coli JJ2050 hits</a>             |
| <a href="#">Escherichia coli JJ2193</a>             | <a href="#">1</a>   | 1                   | <a href="#">Escherichia coli JJ2193 hits</a>             |
| <a href="#">Escherichia coli JJ2643</a>             | <a href="#">1</a>   | 1                   | <a href="#">Escherichia coli JJ2643 hits</a>             |



|                                                          |    |   |                                                           |
|----------------------------------------------------------|----|---|-----------------------------------------------------------|
| ... <a href="#">Escherichia coli JJ2016</a>              | 1  | 1 | <a href="#">Escherichia coli JJ2016 hits</a>              |
| ... <a href="#">Escherichia coli MVA038</a>              | 1  | 1 | <a href="#">Escherichia coli MVA038 hits</a>              |
| ... <a href="#">Escherichia coli MVA046</a>              | 1  | 1 | <a href="#">Escherichia coli MVA046 hits</a>              |
| ... <a href="#">Escherichia coli H061</a>                | 1  | 1 | <a href="#">Escherichia coli H061 hits</a>                |
| ... <a href="#">Escherichia coli MVA014</a>              | 1  | 1 | <a href="#">Escherichia coli MVA014 hits</a>              |
| ... <a href="#">Escherichia coli MVA0036</a>             | 1  | 1 | <a href="#">Escherichia coli MVA0036 hits</a>             |
| ... <a href="#">Escherichia coli JJ1897</a>              | 1  | 1 | <a href="#">Escherichia coli JJ1897 hits</a>              |
| ... <a href="#">Escherichia coli G213</a>                | 1  | 1 | <a href="#">Escherichia coli G213 hits</a>                |
| ... <a href="#">Escherichia coli G132</a>                | 1  | 1 | <a href="#">Escherichia coli G132 hits</a>                |
| ... <a href="#">Escherichia coli JJ1901</a>              | 1  | 1 | <a href="#">Escherichia coli JJ1901 hits</a>              |
| ... <a href="#">Escherichia coli H016</a>                | 1  | 1 | <a href="#">Escherichia coli H016 hits</a>                |
| ... <a href="#">Escherichia coli G150</a>                | 1  | 1 | <a href="#">Escherichia coli G150 hits</a>                |
| ... <a href="#">Escherichia coli CU758</a>               | 1  | 1 | <a href="#">Escherichia coli CU758 hits</a>               |
| ... <a href="#">Escherichia coli H003</a>                | 1  | 1 | <a href="#">Escherichia coli H003 hits</a>                |
| ... <a href="#">Escherichia coli H006</a>                | 1  | 1 | <a href="#">Escherichia coli H006 hits</a>                |
| ... <a href="#">Escherichia coli CD400</a>               | 1  | 1 | <a href="#">Escherichia coli CD400 hits</a>               |
| ... <a href="#">Escherichia coli C001</a>                | 1  | 1 | <a href="#">Escherichia coli C001 hits</a>                |
| ... <a href="#">Escherichia coli JJ2118</a>              | 1  | 1 | <a href="#">Escherichia coli JJ2118 hits</a>              |
| ... <a href="#">Escherichia coli JJ2134</a>              | 1  | 1 | <a href="#">Escherichia coli JJ2134 hits</a>              |
| ... <a href="#">Escherichia coli JJ2547</a>              | 1  | 1 | <a href="#">Escherichia coli JJ2547 hits</a>              |
| ... <a href="#">Escherichia coli VR50</a>                | 1  | 1 | <a href="#">Escherichia coli VR50 hits</a>                |
| ... <a href="#">Escherichia coli str. 'clone D i2'</a>   | 1  | 1 | <a href="#">Escherichia coli str. 'clone D i2' hits</a>   |
| ... <a href="#">Escherichia coli str. 'clone D i14'</a>  | 1  | 1 | <a href="#">Escherichia coli str. 'clone D i14' hits</a>  |
| ... <a href="#">Escherichia coli O25b:H4</a>             | 1  | 1 | <a href="#">Escherichia coli O25b:H4 hits</a>             |
| ... <a href="#">Escherichia coli LAU-EC7</a>             | 1  | 1 | <a href="#">Escherichia coli LAU-EC7 hits</a>             |
| ... <a href="#">Escherichia coli 1-250-04_S4_C2</a>      | 1  | 1 | <a href="#">Escherichia coli 1-250-04_S4_C2 hits</a>      |
| ... <a href="#">Escherichia coli 1-250-04_S4_C1</a>      | 1  | 1 | <a href="#">Escherichia coli 1-250-04_S4_C1 hits</a>      |
| ... <a href="#">Escherichia coli KTE57</a>               | 1  | 1 | <a href="#">Escherichia coli KTE57 hits</a>               |
| ... <a href="#">Escherichia coli HVH 77 (4-2605759)</a>  | 1  | 1 | <a href="#">Escherichia coli HVH 77 (4-2605759) hits</a>  |
| ... <a href="#">Escherichia coli HVH 216 (4-3042952)</a> | 1  | 1 | <a href="#">Escherichia coli HVH 216 (4-3042952) hits</a> |
| ... <a href="#">Escherichia coli 910096-2</a>            | 1  | 1 | <a href="#">Escherichia coli 910096-2 hits</a>            |
| ... <a href="#">Escherichia coli 1-110-08_S4_C1</a>      | 1  | 1 | <a href="#">Escherichia coli 1-110-08_S4_C1 hits</a>      |
| ... <a href="#">Escherichia coli HVH 51 (4-2172526)</a>  | 1  | 1 | <a href="#">Escherichia coli HVH 51 (4-2172526) hits</a>  |
| ... <a href="#">Escherichia coli O21</a>                 | 1  | 1 | <a href="#">Escherichia coli O21 hits</a>                 |
| ... <a href="#">Escherichia coli G199</a>                | 1  | 1 | <a href="#">Escherichia coli G199 hits</a>                |
| ... <a href="#">Escherichia coli O25b:H4-ST131</a>       | 6  | 1 | <a href="#">Escherichia coli O25b:H4-ST131 hits</a>       |
| ... <a href="#">Escherichia coli MVA0158</a>             | 1  | 1 | <a href="#">Escherichia coli MVA0158 hits</a>             |
| .. <a href="#">Shigella</a>                              | 13 | 5 |                                                           |
| ... <a href="#">Shigella flexneri</a>                    | 7  | 1 | <a href="#">Shigella flexneri hits</a>                    |
| ... <a href="#">Shigella boydii</a>                      | 2  | 1 | <a href="#">Shigella boydii hits</a>                      |
| ... <a href="#">unclassified Shigella</a>                | 2  | 2 |                                                           |
| ... <a href="#">Shigella sp. FC2045</a>                  | 1  | 1 | <a href="#">Shigella sp. FC2045 hits</a>                  |
| ... <a href="#">Shigella sp. FC2928</a>                  | 1  | 1 | <a href="#">Shigella sp. FC2928 hits</a>                  |
| ... <a href="#">Shigella sonnei</a>                      | 2  | 1 | <a href="#">Shigella sonnei hits</a>                      |
