# Supplementary material for: Secreted Autotransporter Toxin (Sat) Mediates Innate Immune System Evasion
Source: PubMed Central journal article supplement (PMC8891578; doi:10.3389/fimmu.2022.844878), 2022-02-17
Supplement: DataSheet_2.pdf [file DataSheet_2.pdf]

## Summary

# 1. Notes

## 2. Result Statistics

**Figure 1.** False discovery rate (FDR) curve. X axis is the number of peptide-spectrum matches (PSM) being kept. Y axis is the corresponding FDR. [🔗](#)

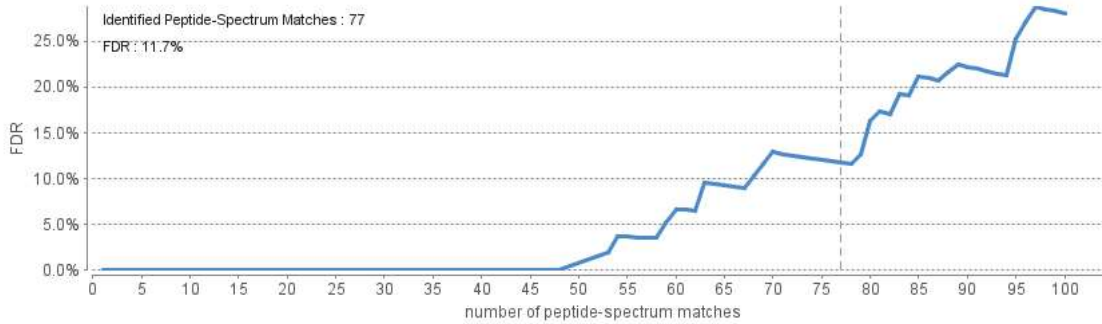

**Figure 2.** PSM score distribution. (a) Distribution of PEAKS peptide score; (b) Scatterplot of PEAKS peptide score versus precursor mass error. [🔗](#)

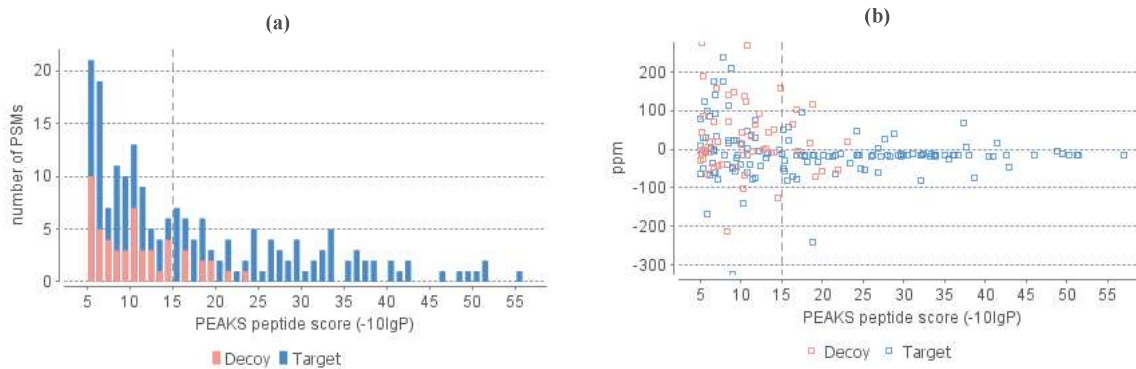

**Figure 3.** De novo result validation. Distribution of residue local confidence: (a) Residues in de novo sequences validated by confident database peptide assignment; (b) Residues in "de novo only" sequences. [🔗](#)

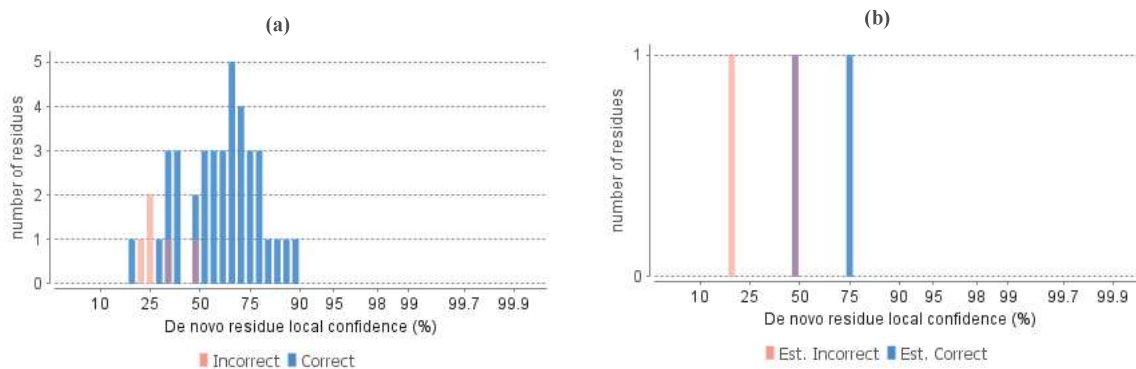

**Table 1.** Statistics of data.

|                  |     |
|------------------|-----|
| # of MS Scans    | 0   |
| # of MS/MS Scans | 344 |

**Table 2.** Result filtration parameters.

|                          |      |
|--------------------------|------|
| Peptide -10lgP           | ≥15  |
| Protein -10lgP           | ≥20  |
| Proteins unique peptides | ≥0   |
| De novo ALC Score        | ≥50% |

**Table 3.** Statistics of filtered result.

|                          |    |
|--------------------------|----|
| Peptide-Spectrum Matches | 77 |
| Peptide Sequences        | 74 |

**Table 4.** PTM profile.

| Name            | ΔMass  | #PSM | Position |
|-----------------|--------|------|----------|
| Carbamidomethyl | 57.02  | 6    | N-term   |
| Deamidation     | .98    | 2    | NQ       |
| Acetylation     | 42.01  | 1    | N-term   |
| Methyl ester    | 14.02  | 1    | E        |
| Carbamidomethyl | 57.02  | 1    | C        |
| Pyro-glu from Q | -17.03 | 1    | N-term   |

|                                |                         |
|--------------------------------|-------------------------|
| Protein Groups                 | 5                       |
| Proteins                       | 7                       |
| Proteins (#Unique Peptides)    | 1 (>2); 0 (=2); 6 (=1); |
| FDR (Peptide-Spectrum Matches) | 11.7%                   |
| FDR (Peptide Sequences)        | 12.2%                   |
| FDR (Protein)                  | 42.9%                   |
| De Novo Only Spectra           | 1                       |

### 3. Experiment Control

**Figure 4.** Precursor mass error of peptide-spectrum matches (PSM) in filtered result. (a) Distribution of precursor mass error in ppm; (b) Scatterplot of precursor m/z versus precursor mass error in ppm.

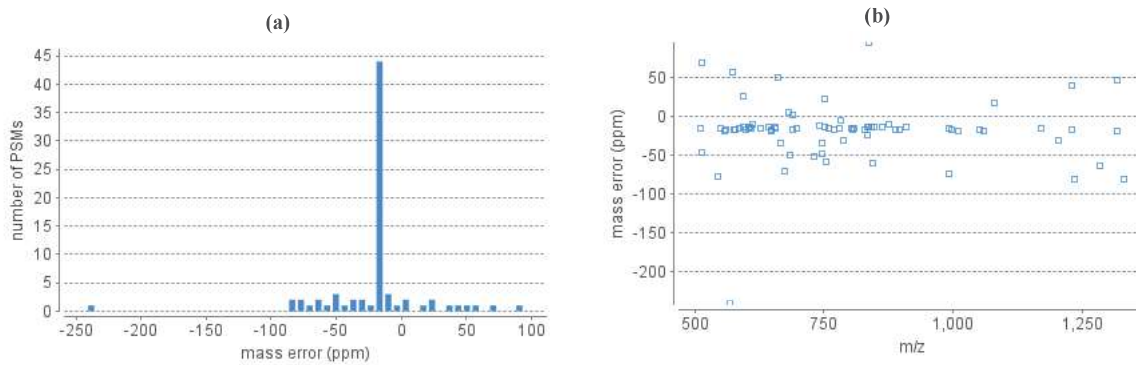

**Table 5.** Number of identified peptides in each sample by the number of missed cleavages

|                  |    |   |   |   |    |
|------------------|----|---|---|---|----|
| Missed Cleavages | 0  | 1 | 2 | 3 | 4+ |
| Sample 1         | 67 | 7 | 0 | 0 | 0  |

### 4. Other Information

**Table 6.** Search parameters.

Query Type: Homology Match  
 Fixed Modifications:  
 Carbamidomethylation: 57.02  
 Variable Modifications:  
 Oxidation (M): 15.99  
 Fragment ion tolerance: 0.1  
 L equals I: true  
 Q equals K: true  
 Report number: 1  
 Maximum # of PTMs: 3  
 De novo score (ALC%) threshold: 15  
 Peptide hit threshold (-10logP): 30.0  
 Peaks run ID: 12  
 Merge Options: 0.1 min. 0.1 Da  
 Precursor Options: corrected  
 Charge Options: no correction  
 Filter Options: no filter  
 Process: true

**Table 7.** Instrument parameters.

Fractions: CLAUDIA\_33.mgf  
 Ion Source: ESI(nano-spray)  
 Fragmentation Mode: CID, CAD(y and b ions)  
 MS Scan Mode: 3D Ion Trap  
 MS/MS Scan Mode: Time of Flight (TOF)

#### Protein List

| Protein Group    | Protein ID | Accession                          | -10lgP | Coverage (%) | #Peptides | #Unique | PTM | Avg. Mass | Description                                                                                                                                                        |
|------------------|------------|------------------------------------|--------|--------------|-----------|---------|-----|-----------|--------------------------------------------------------------------------------------------------------------------------------------------------------------------|
| 1                | 195        | <a href="#">Q8FDW4 SAT_ECOL6</a>   | 202.60 | 42           | 52        | 51      | Y   | 140042    | Serine protease sat autotransporter OS=Escherichia coli O6:H1 (strain CFT073 / ATCC 700928 / UPEC) OX=199310 GN=sat PE=1 SV=2                                      |
| 3                | 378        | <a href="#">A7FCR5 LIGB_YERP3</a>  | 27.63  | 1            | 1         | 1       | N   | 63624     | DNA ligase B OS=Yersinia pseudotuberculosis serotype O:1b (strain IP 31758) OX=349747 GN=ligB PE=3 SV=1                                                            |
| 4                | 463        | <a href="#">Q76N89 HECW1_HUMAN</a> | 26.79  | 0            | 1         | 1       | Y   | 179553    | E3 ubiquitin-protein ligase HECW1 OS=Homo sapiens OX=9606 GN=HECW1 PE=1 SV=3                                                                                       |
| 2                | 373        | <a href="#">B5Z6D1 CH60_HELPG</a>  | 23.45  | 1            | 1         | 1       | Y   | 58228     | 60 kDa chaperonin OS=Helicobacter pylori (strain G27) OX=563041 GN=groL PE=3 SV=1                                                                                  |
| 2                | 374        | <a href="#">B6JPA7 CH60_HELP2</a>  | 23.45  | 1            | 1         | 1       | Y   | 58300     | 60 kDa chaperonin OS=Helicobacter pylori (strain P12) OX=570508 GN=groL PE=3 SV=1                                                                                  |
| 2                | 372        | <a href="#">Q7U317 CH60_HELHP</a>  | 23.45  | 1            | 1         | 1       | Y   | 57651     | 60 kDa chaperonin OS=Helicobacter hepaticus (strain ATCC 51449 / 3B1) OX=235279 GN=groL PE=3 SV=1                                                                  |
| 6                | 207        | <a href="#">Q82WTS CYS_A_NITEU</a> | 21.49  | 2            | 1         | 1       | N   | 40893     | Sulfate/thiosulfate import ATP-binding protein CysA OS=Nitrosomonas europaea (strain ATCC 19718 / CIP 103999 / KCTC 2705 / NBRC 14298) OX=228410 GN=cysA PE=3 SV=1 |
| total 7 proteins |            |                                    |        |              |           |         |     |           |                                                                                                                                                                    |

[Q8FDW4|SAT\\_ECOL6](#)

[back to list](#)

[| Protein Coverage](#) | [Supporting Peptides](#) |

## Protein Coverage:

1 MNKIYSLKYS AATGGIAVS ELAKRVSGKT NRKLVATMLS LAVAGTVNAA NIDISNVWAR **DYLDLAQNKG IFQPGATDVT** Carba  
 81 **ITLKN**GDKFS FHNLSIPDFS GAAASGAATA IGGYSVTVVA HNKKNPQAAE TQVYAQSSYR VVDRRNSNDF EIQRNLK**FVV** Carba  
 161 **ETVGATPAET NPTTYSDALE RYGI**VTS DGS **KKIIGFRAGS GGTSFINGES KISTNSAYSH DLLSASLFEV TQW**DSYGM**MI** Carba  
 241 **YKNDKTFRNL EIFGDSGSGA YLYDNKLEK**W VLVGTTHGIA SVNGDQLTWI TKYND**KLVSE LKDTYSHKIN LNGNNVTIKN** Carba  
 321 **TDITLHQNNA DTTGTQEK**IT **KDKDIVFTNG GDVLFKDNLD FGSGGIIFDE GHEY**NINGQG FTFKGAGIDI **GKESIVN**WNA Carba  
 401 **LYSSDDVLHK IGPGLTNVQK** **KOGANIK**IGE GNVILNEEGT FNNIYLASGN **GKVILNKDNS LGNDQYAGIF FTK**RGGTLDDL Carba  
 481 NGHNQTFTRI **AATDDGTTIT NSD**TTKEAVL AINNEDSYIY HGNINGNIK**L THNINSQDKK** TNAKLILDGS **VNTKNDVEVS** Carba  
 561 **NASLTMQGH**A **TEHAIFR**SSA NHCSL**VFLCG TDWVTVLKET** ESSYNKKFNS **DYKSNNQQTS FDQP**DWKTGV **FKFDTLHLNN** Carba  
 641 **ADFSISR**NAN **VEGNISANKS AITIGDKNVY** IDNLAGKNIT **NGGFDFKQTI STNLSIGETK** FTGGITAHNS QIAIGDQAVV Carba  
 721 TLNGATF**LDN TPISIDK**GAK **VIAQNSM**FTT **KGIDISGELT MMGIPEQNSK TVTPGLHYAA DGFRLSGGNA NFIARNMASV** Carba  
 801 TGNİYADDA TITLGQPETE TPTISSAYQA WAETLLY**GF**D **TAYRGAITAP KATVSMNNAI WHLNSQSSIN RLET**K**DSMVR** Carba  
 881 FTGDNGKFTT LTVNNLTIDD SAFVLRANLA QADQLVVNKS LSGK**NNLLLV DFIEKNGNSN GLNIDLV**SAP **KGTA**VDV**FKA** Carba  
 961 TTR**SIGFSDV TPVIEQK**NDT DKATWTLIGY KSVANADAAK KATLLMSGGY **KAF**LAEVNNL NKRMGDLRDI NGESGAWARI Carba  
 1041 ISGTGSAGGG FSDNYTHVQV GADNKHELDG LDLFTGVTMT YTD SHAGSDA FSGETKSVGA GLYASAMFES GAYIDLIGKY Carba  
 1121 VHHDNEYTAT FAGLGRDYS SHSWYAGAEV GYRYHVTDSA WIEPQAEVY GAVSGKQFSW KDQGMNLTMK DKDFNPLIGR Carba  
 1201 TGVDVGKSFS GKDWKVTARA GLGYQFDLFA NGETVLRDAS GEKRIKGEKD GRMLMNVGLN AEIRDNLRFQ LEFEKSAFGK Carba  
 1281 YNVDNAINAN FRYSF Mutat

## Supporting Peptides:

| Peptide                     | Uniq | -10lgP | Mass      | ppm   | m/z       | z | RT   | Scan | #Spec | Start | End | PTM                                   |
|-----------------------------|------|--------|-----------|-------|-----------|---|------|------|-------|-------|-----|---------------------------------------|
| K.NGNSN(+.98)GLNIDLVSAPK.G  | Y    | 56.93  | 1612.8057 | -15.5 | 807.3976  | 2 | 0.41 | 850  | 1     | 936   | 951 | Deamidation (NQ)                      |
| K.QTISTNLSIGETK.F           | Y    | 51.40  | 1390.7303 | -15.6 | 696.3616  | 2 | 0.34 | 802  | 1     | 688   | 700 |                                       |
| R.SIGFSDVTPVIEQK.N          | Y    | 51.27  | 1518.7930 | -15.8 | 760.3918  | 2 | 0.42 | 828  | 1     | 964   | 977 |                                       |
| K.TVTPGLHYAADGFR.L          | Y    | 50.18  | 1503.7469 | -14.7 | 752.8697  | 2 | 0.35 | 824  | 1     | 771   | 784 |                                       |
| K.FDTLHLNNAFDSISR.N         | Y    | 49.46  | 1748.8481 | -11.3 | 875.4215  | 2 | 0.43 | 887  | 1     | 633   | 647 |                                       |
| K.GIFQ(+.98)PGATDVTITLK.N   | Y    | 48.73  | 1560.8398 | -5.7  | 781.4227  | 2 | 0.45 | 840  | 1     | 70    | 84  | Deamidation (NQ)                      |
| K.DNSLGNQYAGIFFTK.R         | Y    | 46.00  | 1788.8318 | -16.9 | 895.4080  | 2 | 0.46 | 896  | 1     | 458   | 473 |                                       |
| K.IGPGLTNVQK.K              | Y    | 42.90  | 1025.5869 | -46.1 | 513.7771  | 2 | 0.27 | 698  | 1     | 411   | 420 |                                       |
| K.NDVEVSNASLTMQGHATEHAIFR.S | Y    | 42.55  | 2526.1921 | -14.8 | 843.0589  | 3 | 0.50 | 865  | 1     | 555   | 577 |                                       |
| R.DYLDLAQNK.G               | Y    | 41.37  | 1078.5294 | 16.3  | 1079.5543 | 1 | 0.35 | 962  | 1     | 61    | 69  |                                       |
| L.VFLC(+57.02)GTDWVTVLK.E   | Y    | 40.92  | 1536.8010 | -17.6 | 769.3943  | 2 | 0.51 | 835  | 1     | 586   | 598 | Carbamidomethylation                  |
| R.LSGGANFIAR.N              | Y    | 40.35  | 1118.5833 | -17.4 | 560.2892  | 2 | 0.30 | 718  | 1     | 785   | 795 |                                       |
| K.DNLDFGSGGIIFDEGHEY.N      | Y    | 38.69  | 1983.8486 | -75.1 | 992.8571  | 2 | 0.50 | 923  | 2     | 357   | 374 |                                       |
| R.IAATDDGTTITNSDITK.E       | Y    | 38.02  | 1723.8112 | -14.2 | 862.9006  | 2 | 0.27 | 883  | 1     | 490   | 506 |                                       |
| W.NALYSSDDVLHK.I            | Y    | 37.66  | 1360.6622 | 5.4   | 681.3420  | 2 | 0.43 | 787  | 1     | 399   | 410 |                                       |
| R.YGN(sub I)VTSDGSK.K       | Y    | 37.36  | 1026.4618 | 69.4  | 514.2738  | 2 | 0.27 | 700  | 1     | 182   | 191 | Mutation                              |
| G.F(+57.02)DTAYR.G          | Y    | 36.70  | 828.3766  | -17.0 | 829.3698  | 1 | 0.26 | 856  | 1     | 839   | 844 | Carbamidomethylation (DHKE, X@N-term) |
| R.AGSGGTSFINGESK.I          | Y    | 36.03  | 1310.6102 | -13.9 | 656.3033  | 2 | 0.26 | 768  | 1     | 198   | 211 |                                       |
| K.DKDIVFTL(sub N)GGDVLFK.D  | Y    | 35.54  | 1665.8977 | -25.0 | 833.9353  | 2 | 0.43 | 858  | 1     | 342   | 356 | Mutation                              |
| K.INLNGNNVTIK.N             | Y    | 35.08  | 1198.6670 | -16.8 | 600.3307  | 2 | 0.33 | 736  | 1     | 309   | 319 |                                       |
| K.GIDISGELTMMGIPEQNSK.T     | Y    | 33.82  | 2018.9652 | -18.3 | 1010.4714 | 2 | 0.51 | 926  | 1     | 752   | 770 |                                       |
| K.DKDIVFTNGGDVLFK.D         | Y    | 33.78  | 1666.8566 | -14.8 | 834.4232  | 2 | 0.44 | 859  | 1     | 342   | 356 |                                       |
| K.NGNSNGLNIDLVSAPK.G        | Y    | 33.69  | 1611.8217 | -17.1 | 806.9043  | 2 | 0.39 | 849  | 1     | 936   | 951 |                                       |
| K.V(+57.02)ILNK.D           | Y    | 33.35  | 642.4064  | -13.7 | 643.4049  | 1 | 0.23 | 758  | 1     | 453   | 457 | Carbamidomethylation (DHKE, X@N-term) |
| K.LILDGVSNTK.N              | Y    | 33.18  | 1058.5972 | -18.8 | 1059.5846 | 1 | 0.33 | 948  | 1     | 545   | 554 |                                       |
| G.M(+57.02)MIYK.N           | Y    | 32.32  | 741.3553  | -11.6 | 742.3540  | 1 | 0.29 | 812  | 1     | 238   | 242 | Carbamidomethylation (DHKE, X@N-term) |
| K.T(+57.02)GVFK.F           | Y    | 32.20  | 607.3329  | -16.5 | 608.3302  | 1 | 0.22 | 744  | 1     | 628   | 632 | Carbamidomethylation (DHKE, X@N-term) |
| R.NLEIFGDSGSGAY.L           | Y    | 32.05  | 1328.5884 | -81.6 | 1329.4873 | 1 | 0.45 | 1016 | 1     | 249   | 261 |                                       |
| K.SAITIGDK.N                | Y    | 31.99  | 803.4388  | -15.2 | 804.4339  | 1 | 0.25 | 847  | 1     | 660   | 667 |                                       |
| K.Q(-17.03)GANIK.I          | Y    | 31.08  | 612.3231  | -11.4 | 613.3234  | 1 | 0.15 | 747  | 1     | 422   | 427 | Pyro-glu from Q                       |
| R.GAITAPK.A                 | Y    | 30.38  | 656.3857  | -15.6 | 657.3827  | 1 | 0.20 | 772  | 1     | 845   | 851 |                                       |

total 57 peptides

| Peptide                      | Uniq | -10lgP | Mass      | ppm   | m/z       | z | RT   | Scan | #Spec | Start | End  | PTM                                                 |
|------------------------------|------|--------|-----------|-------|-----------|---|------|------|-------|-------|------|-----------------------------------------------------|
| K.GIFQPGATDVITTLK.N          | Y    | 29.93  | 1559.8558 | -16.0 | 780.9227  | 2 | 0.46 | 838  | 1     | 70    | 84   |                                                     |
| K.GTAVDVFKA                  | Y    | 29.67  | 835.4440  | -13.7 | 836.4398  | 1 | 0.32 | 861  | 1     | 952   | 959  |                                                     |
| T.VGATPAETNPPTYSDALER.Y      | Y    | 29.62  | 1991.9436 | -17.7 | 996.9614  | 2 | 0.35 | 925  | 1     | 163   | 181  |                                                     |
| K.TGVFK.F                    | Y    | 29.25  | 550.3115  | -15.6 | 551.3102  | 1 | 0.20 | 714  | 1     | 628   | 632  |                                                     |
| R.NANVEGNISANK.S             | Y    | 28.73  | 1229.6000 | 40.1  | 1230.6566 | 1 | 0.22 | 989  | 2     | 648   | 659  |                                                     |
| K.NTDITLHQNNADTTGTQEK.I      | Y    | 28.22  | 2099.9719 | -17.5 | 1050.9749 | 2 | 0.26 | 946  | 1     | 320   | 338  |                                                     |
| K.LVSELK.D                   | Y    | 27.89  | 687.4167  | -17.0 | 688.4123  | 1 | 0.24 | 794  | 1     | 297   | 302  |                                                     |
| K.TVTPGLHY.A                 | Y    | 27.08  | 886.4548  | -17.4 | 887.4467  | 1 | 0.30 | 890  | 1     | 771   | 778  |                                                     |
| T.E(+57.02)(+14.02)HAIFR.S   | Y    | 26.77  | 842.4399  | -61.3 | 843.3955  | 1 | 0.46 | 869  | 1     | 572   | 577  | Carbamidomethylation (DHKE, X@N-term); Methyl ester |
| K.SNNQQTSTFDQPDWK.T          | Y    | 26.14  | 1693.7332 | -14.0 | 847.8620  | 2 | 0.32 | 872  | 1     | 614   | 627  |                                                     |
| F.LN(sub D)NTPISIDK.G        | Y    | 26.07  | 1113.6030 | -18.4 | 557.7985  | 2 | 0.30 | 716  | 1     | 728   | 737  | Mutation                                            |
| K.GAGIDIGK.E                 | Y    | 25.11  | 729.4021  | -52.0 | 730.3715  | 1 | 0.31 | 811  | 1     | 385   | 392  |                                                     |
| K.L(+57.02)VSELK.D           | Y    | 24.72  | 744.4381  | -49.0 | 745.4089  | 1 | 0.33 | 815  | 1     | 297   | 302  | Carbamidomethylation (DHKE, X@N-term)               |
| Y.LYDNKLEK.W                 | Y    | 24.51  | 1021.5444 | -16.0 | 511.7713  | 2 | 0.23 | 695  | 1     | 262   | 269  |                                                     |
| W.HLNSQSSINR.L               | Y    | 24.37  | 1154.5792 | -16.8 | 578.2872  | 2 | 0.19 | 728  | 1     | 862   | 871  |                                                     |
| K.NNLLLVDFIEK.N              | Y    | 24.19  | 1316.7340 | 45.6  | 1317.8013 | 1 | 0.52 | 1012 | 2     | 925   | 935  |                                                     |
| K.VILNK.D                    | Y    | 24.11  | 585.3850  | -15.7 | 586.3831  | 1 | 0.20 | 731  | 1     | 453   | 457  |                                                     |
| K.VIAQNSMF.T                 | Y    | 22.16  | 908.4426  | -13.4 | 909.4377  | 1 | 0.36 | 899  | 1     | 741   | 748  |                                                     |
| K.FVVETVGATPAETNPPTYSDALER.Y | Y    | 21.62  | 2567.2390 | -63.7 | 1284.5450 | 2 | 0.43 | 999  | 1     | 158   | 181  |                                                     |
| K.LTHNINSQDKK.T              | Y    | 20.69  | 1296.6786 | -18.9 | 649.3343  | 2 | 0.20 | 761  | 1     | 530   | 540  |                                                     |
| K.NITNNGFDFK.Q               | Y    | 20.12  | 1168.5513 | -16.3 | 1169.5396 | 1 | 0.35 | 982  | 1     | 678   | 687  |                                                     |
| K.DSMVR.F                    | Y    | 18.97  | 606.2795  | -14.4 | 607.2781  | 1 | 0.08 | 743  | 1     | 876   | 880  |                                                     |
| K.FVET.V                     | Y    | 17.84  | 593.3060  | -14.5 | 594.3047  | 1 | 0.31 | 734  | 1     | 158   | 162  |                                                     |
| K.AFLAEV.N                   | Y    | 17.32  | 648.3483  | -16.7 | 649.3447  | 1 | 0.39 | 762  | 1     | 1012  | 1017 |                                                     |
| K.IIGFR.A                    | N    | 16.73  | 604.3696  | -15.8 | 605.3674  | 1 | 0.31 | 741  | 1     | 193   | 197  |                                                     |
| K.ISTNSAYSHDLLSASLFEVTQW.D   | Y    | 15.60  | 2468.1860 | -81.3 | 1235.0000 | 2 | 0.59 | 991  | 1     | 212   | 233  |                                                     |
| total 57 peptides            |      |        |           |       |           |   |      |      |       |       |      |                                                     |

**A7FCR5|LIGB\_YERP3**[back to list](#)[| Protein Coverage | Supporting Peptides |](#)**Protein Coverage:**

1 MNILNLKIIM FLLISNIIIV GGAWATSTCP DWPATRIAVE INALEQQLNK WSAAYHQQGH SPVTDDIYDQ LQDKLRVWQS  
81 CRGLPDKTES QPIPGKGQFL HPVAHTGLKK LKDETALTRW MAGRKNLWVQ PKVDGVAVTL VYHGGKLVQL LSRGNGVKGQ  
161 NWTEKAPFIS AIPQYIANAP ALLTLQGELE LLMDGHQQAQ SGGVNARSTV AGALMRKSPS PLLAQVGVFI WAWPDGPTTM  
241 KEKVALLQVM GFPFTAKYSE PVMSHLDDVVQ WRQFWFQAPL PFVTDGVVVR QEEEPAGRYW QATPGQWSMA WKYPPLQHIA  
321 EVKDIH**FTLG R**RTGKGTVVLE VLPKIDDKW IRRVNIGSVT RWKQWDIAPG DHITLALAGH GIPRLDNVVW RVHQRNTITA  
401 PNWDKFKHQLS CFQRLPHGCE PQFLSRLIWL SGPGLDIGG IGGGFQWELI HHELINDLVG WLLLTPEQIA SIPGIGNARA  
481 EKIQQQFQRA KQPPFSRWLL ALGFPQVVSV DAQWQVLLRR SLSEWATMAG IGQMRKQIK HFLDHPDVQA LADFLSTQKV  
561 VGFELTE

**Supporting Peptides:**

| Peptide          | Uniq | -10lgP | Mass     | ppm  | m/z      | z | RT   | Scan | #Spec | Start | End | PTM |
|------------------|------|--------|----------|------|----------|---|------|------|-------|-------|-----|-----|
| H.FTLGR.T        | Y    | 27.63  | 592.3333 | 25.7 | 593.3558 | 1 | 0.25 | 733  | 1     | 327   | 331 |     |
| total 1 peptides |      |        |          |      |          |   |      |      |       |       |     |     |

**Q76N89|HECW1\_HUMAN**[back to list](#)[| Protein Coverage | Supporting Peptides |](#)**Protein Coverage:**

|      |            |            |                |            |             |            |            |            |            |  |
|------|------------|------------|----------------|------------|-------------|------------|------------|------------|------------|--|
| 1    | MLLHLCSVKN | LYQNRFLGLA | <b>AMASPSR</b> | NSQ        | SRRRCKEPLR  | YSYNPDQFHN | MDLRGGPHDG | VTIPRSTSDT | DLVTSDSRST |  |
| 81   | LMVSSSYYSI | GHSQDLVIHW | DIKEEVDAGD     | WIGMYLIDEV | LSENFLDYKN  | RGVNGSHRQ  | IIWKIDASSY | FVEPETKICF |            |  |
| 161  | KYYHGVSGAL | RATTPSVTVK | NSAAPIFKSI     | GADETVOGQG | SRRLISFSL   | DFQAMGLKKG | MFFNPDYLYK | ISIQPGKHSI |            |  |
| 241  | FPALPHHGQE | RRSKIIGNTV | NPIWQAEQFS     | FVSLPTDVLE | IEVKDKFAKS  | RPIIKRFLGK | LSMPVQRLL  | RHAIGDRVVS |            |  |
| 321  | YTLGRRLPTD | HVSGQLQFRF | EITSSIHDD      | EEISLSTEPE | SAQIQDSPMN  | NLMESGSGEP | RSEAPESSES | WKPEQLGEGS |            |  |
| 401  | VPDGPNGQSI | ELSRPAEEAA | VITEAGDQGM     | VSVGPEGAGE | LLAQVQKDIQ  | PAPSAEELAE | QLDLGEEASA | LLLEDGEAPA |            |  |
| 481  | STKEEPLLEE | ATTQSRAGRE | EEKEQEVEEG     | DVSTLEQEGE | RLQLRASVGR  | KSRPCSLPVS | ELETVIASAC | GDPETPRTHY |            |  |
| 561  | IRIHTLLHSM | PSAQGGSAAE | EEDGAEVEEST    | LKDSSEKDG  | SEVDTVAADP  | SALEEDREEP | EGATPGTAHP | GHSGGHFPPL |            |  |
| 641  | ANGAAQDGD  | HPSTGSESDS | SPRQGGDHSC     | EGCDASCCSP | SCYSSSCYST  | SCYSSSCYSA | SCYSPSCYNG | NRFASHTRFS |            |  |
| 721  | SVDSAKISES | TVFSSQDDEE | EENSASFESVP    | DSMQSPELDP | ESTNGAGPWQ  | DELAAPSGHV | ERSPEGLESP | VAGPSNRREG |            |  |
| 801  | ECPILHNSQP | VSQPLSLRPE | HHHYPTIDEF     | LPPNWEARID | SHGRVIFYVDH | VNRTTTWQRP | TAAATPDGMR | RSGSIQQMEQ |            |  |
| 881  | LNRRYQNIQR | TIATERSEED | SGSQSCEQAP     | AGGGGGGGSD | SEAESSQSSL  | DLRREGSLSP | VNSQKITLLL | QSPAVKFITN |            |  |
| 961  | PEFFTVLHAN | YSAYRVFTSS | TCLKHMILKV     | RRDARNFERY | QHNRDLVNF   | NMFADTRLEL | PRGWEIKTDQ | QGKSFFVDHN |            |  |
| 1041 | SRATTFIDPR | IPLQNGRLPN | HLTHRQHLQR     | LRSYSAGEAS | EVSRNRGASL  | LARPGHSLVA | AIRSQHQHE  | LPLAYNDKIV |            |  |
| 1121 | AFLRQPNIFE | MLQERQPSLA | RNHTLREKIH     | YIRTEGNHGL | EKLSCDADLV  | ILLSLFEEEI | MSYVPLQAAF | HPGYSFSPRC |            |  |
| 1201 | SPCSPQNSP  | GLQRASARAP | SPYRRDFEAK     | LRNFYRKLEA | KGFGQGP     | GKI        | KLIIRRDHLL | EGTFNQVMAY | SRKELQRNKL |  |
| 1281 | YVTFVGEGL  | DYSGPSREFF | FLLSQELFNP     | YYGLFEYSAN | DTYTVQISPM  | SAFVENHLEW | FRFSGRILGL | ALIHQYLLDA |            |  |
| 1361 | FFTRPFYKAL | LRLPCDLSDL | EYLDEEFHQ      | LQWMKDNNT  | DILDLTFTVN  | EEVFGQVTER | ELKSGGANTQ | VTEKNKKEYI |            |  |
| 1441 | ERMVKRVER  | GVVQTEALV  | RGFYEVVDSR     | LVSVFDAREL | ELVIAGTAEI  | DLNDWRNTE  | YRGYHDGHL  | VIRWFVAAVE |            |  |
| 1521 | RFNNEQRLRL | LQFVTGTSSV | PYEGFAALRG     | SNGLRRFCIE | KWGKITSLPR  | AHTCFNRLDL | PPYPSYMLY  | EKLLTAVEET |            |  |
| 1601 | STFGL      |            |                |            |             |            |            |            |            |  |

## Supporting Peptides:

| Peptide           | Uniq | -10lgP | Mass     | ppm | m/z      | z | RT   | Scan | #Spec | Start | End | PTM      |
|-------------------|------|--------|----------|-----|----------|---|------|------|-------|-------|-----|----------|
| A.MASPE(sub S)R,N | Y    | 26.79  | 689.3167 | 2.0 | 690.3253 | 1 | 0.14 | 799  | 1     | 22    | 27  | Mutation |
| total 1 peptides  |      |        |          |     |          |   |      |      |       |       |     |          |

## B5Z6D1|CH60\_HELPG

[back to list](#)[| Protein Coverage](#) | [| Supporting Peptides](#) |

## Protein Coverage:

|     |            |                 |            |            |            |            |            |            |            |
|-----|------------|-----------------|------------|------------|------------|------------|------------|------------|------------|
| 1   | MAKEIKFSDS | ARNLLFEGVR      | QLHDAVKVTM | GPRGRNVLIQ | KSYGAPSITK | DGVSVAKEIE | LSCPVANMGA | QLVKEVASKT |            |
| 81  | ADAAGDGT   | ATVLAYSIFK      | EGLRNITAGA | NPIEVKRGMD | KAAEAIINEL | KKASKKVGK  | EEITQVATIS | ANSDHNIGKL |            |
| 161 | IADAMEKVGK | DGVITVEEAK      | GIEDELVDVE | GMQFDRGYLS | PYFVTNAEK  | TAQLDNAYIL | LTDKKISSMK | DILPPLEKTM |            |
| 241 | KEGKPLLI   | EDIEGEALTT      | LVVNKLGRVL | NIAAVKAPGF | GDRRKEMLKD | IAVLTGGQVI | SEELGLSLEN | AEVEFLGKAG |            |
| 321 | RIVIDKDN   | <b>TT IVDGK</b> | GHSDD      | VKDRVAQIKT | QIASTTSYD  | KEKLQERLAK | LSGGVAVIKV | GAASEVEMKE | KKDRVDDALS |
| 401 | ATKAAVEEGI | VIGGGAALIR      | AAQKVHLNLH | DDEKVGYEII | MRAIKAPLAQ | IAINAGYDGG | VVVNEVEKHE | GHFGFNASNG |            |
| 481 | KYVDMFKEGI | IDPLKVERIA      | LQNAVSVSSL | LLTTEATVHE | IKEEKAAPAM | PDMGGMGGM  | GMGMM      |            |            |

## Supporting Peptides:

| Peptide            | Uniq | -10lgP | Mass     | ppm   | m/z      | z | RT   | Scan | #Spec | Start | End | PTM      |
|--------------------|------|--------|----------|-------|----------|---|------|------|-------|-------|-----|----------|
| N.D(sub T)TIVDGK,G | Y    | 23.45  | 746.3810 | -35.4 | 747.3618 | 1 | 0.40 | 817  | 1     | 329   | 335 | Mutation |
| total 1 peptides   |      |        |          |       |          |   |      |      |       |       |     |          |

## B6JPA7|CH60\_HELP2

[back to list](#)[| Protein Coverage](#) | [| Supporting Peptides](#) |

## Protein Coverage:

|     |            |                 |            |            |            |            |            |            |            |
|-----|------------|-----------------|------------|------------|------------|------------|------------|------------|------------|
| 1   | MAKEIKFSDS | ARNLLFEGVR      | QLHDAVKVTM | GPRGRNVLIQ | KSYGAPSITK | DGVSVAKEIE | LSCPVANMGA | QLVKEVASKT |            |
| 81  | ADAAGDGT   | ATVLAYSIFK      | EGLRNITAGA | NPIEVKRGMD | KAAEAIINEL | KKASKKVGK  | EEITQVATIS | ANSDHNIGKL |            |
| 161 | IADAMEKVGK | DGVITVEEAK      | GIEDELVDVE | GMQFDRGYLS | PYFVTNAEK  | TAQLDNAYIL | LTDKKISSMK | DILPPLEKTM |            |
| 241 | KEGKPLLI   | EDIEGEALTT      | LVVNKLGRVL | NIAAVKAPGF | GDRRKEMLKD | IAILTGGQVI | SEELGLSLEN | AEVEFLGKAG |            |
| 321 | RIVIDKDN   | <b>TT IVDGK</b> | GHSDD      | VKDRVQIKT  | QIASTTSYD  | KEKLQERLAK | LSGGVAVIKV | GAASEVEMKE | KKDRVDDALS |
| 401 | ATKAAVEEGI | VIGGGAALIR      | AAQKVHLNLH | DDEKVGYEII | MRAIKAPLAQ | IAINAGYDGG | VVVNEVEKHE | GHFGFNASNG |            |
| 481 | KYVDMFKEGI | IDPLKVERIA      | LQNAVSVSSL | LLTTEATVHE | IKEEKATPAM | PDMGGMGGM  | GMGMM      |            |            |

## Supporting Peptides:

| Peptide            | Uniq | -10lgP | Mass     | ppm   | m/z      | z | RT   | Scan | #Spec | Start | End | PTM      |
|--------------------|------|--------|----------|-------|----------|---|------|------|-------|-------|-----|----------|
| N.D(sub T)TIVDGK,G | Y    | 23.45  | 746.3810 | -35.4 | 747.3618 | 1 | 0.40 | 817  | 1     | 329   | 335 | Mutation |
| total 1 peptides   |      |        |          |       |          |   |      |      |       |       |     |          |

## Q7U317|CH60\_HELHP

[back to list](#)[| Protein Coverage](#) | [| Supporting Peptides](#) |

## Protein Coverage:

1 MASKEINFSD SARNKLYEGI KQLSDAVKVT MGPKGRNVL I QKSYGAPTIT KDGVSVAKEI ELADPIANMG AQLVKEVASK  
 81 TADAAGDGT TATVLAYSIIY KEGLRNITAG ANPIEVKRG M DKASAAIIIE LKKSSKKIGG KSDIAQVATI SANSDENIGA  
 161 LIAEAMEKVG KDGVITVEEA KGINDELSV EGMQFDRGYL SAYFVTNTDK MTAQLENAYV LLTDKKISNM KEILP LLEAT  
 241 MQSGKPLLI AEDIEGEALT TLVVNKL RGV LNVSAVKAPG FGDRRKAMLQ DIAILTGGQV ISEELGKTLE AATLADLGSA  
 321 ARIVIDKDN **TIVDGK** GKTK DVKDRIAQIK TEIENTTSDY DREKLQERLA KLSGGVAVIK VGAASEVEMK EKKDRVDDAL  
 401 SATKAAVDEG IVIGGGSALI RASQKVKLKL EGDEAIGYDI IKRAIKAPLA QIATNAGYDA GVVVNEVEKN SKDGF GFNAT  
 481 TGEYVDMFKE GIIDPLKVTR VALQNAVSVS SLLLTTEATI NEIKEDKPAP AMPDMGGMGG MGGMM

**Supporting Peptides:**

| Peptide                 | Uniq | -10lgP | Mass     | ppm   | m/z      | z | RT   | Scan | #Spec | Start | End | PTM      |
|-------------------------|------|--------|----------|-------|----------|---|------|------|-------|-------|-----|----------|
| N.D(sub T)TIVDGK.G      | Y    | 23.45  | 746.3810 | -35.4 | 747.3618 | 1 | 0.40 | 817  | 1     | 330   | 336 | Mutation |
| <b>total 1 peptides</b> |      |        |          |       |          |   |      |      |       |       |     |          |

**Q82WT5|CYSA\_NITEU**[back to list](#)| [Protein Coverage](#) | [Supporting Peptides](#) |**Protein Coverage:**

1 MTIEIHDL SK QFGSFTALND INLK**VNPGEL** LALLGPGSG KTTLLRVIAG LETADSGQVL FNEEDSTD KH IRDRHVG FVF  
 81 QHYALFRNMT IFENVAFLR VRPRKQRPNA PEINHRVTEL LQLVQLDWLA DRYPHQLSGG QRQRIALARA LAVEPSVLLL  
 161 DEFFGALDAK VRKELRAWLR KLHDDMHITS VVTHDQEEA LEVADRIVVM NRGRIEQIGT PDEVYK PAN PFVYEF LGHV  
 241 NLFHGRVHQG HAWIGDLEVD APEYSEAEDL SAIAYVRPHD IEVDRTLNGE PALAAHIVHI LAIGPVVRLE LAGKDNQSTN  
 321 SIYAEISKER FRELQLARGD QVFIKPRKLD LFPNHAQNGS IH

**Supporting Peptides:**

| Peptide                 | Uniq | -10lgP | Mass     | ppm   | m/z      | z | RT   | Scan | #Spec | Start | End | PTM |
|-------------------------|------|--------|----------|-------|----------|---|------|------|-------|-------|-----|-----|
| K.VNPGEL.L              | Y    | 21.49  | 627.3228 | -16.5 | 628.3197 | 1 | 0.28 | 752  | 1     | 25    | 30  |     |
| <b>total 1 peptides</b> |      |        |          |       |          |   |      |      |       |       |     |     |
