# Supplementary material for: Secreted Autotransporter Toxin (Sat) Mediates Innate Immune System Evasion
Source: PubMed Central journal article supplement (PMC8891578; doi:10.3389/fimmu.2022.844878), 2022-02-17
Supplement: Table_1.pdf [file Table_1.pdf]

**Supplementary table 1 – Bacterial strains used in this study.**

| Strains/plasmids              | Characteristics                                                                                                                                                         | Reference                                     |
|-------------------------------|-------------------------------------------------------------------------------------------------------------------------------------------------------------------------|-----------------------------------------------|
| <b>Strains</b>                |                                                                                                                                                                         |                                               |
| EC233/93                      | Sat-producing EAEC used as positive control for Sat production detection                                                                                                | Vieira et al. (2020)                          |
| FBC114                        | Sat-producing DAEC used as positive control for Sat production detection                                                                                                | Taddei et al. (2003)                          |
| <i>Shigella flexneri</i> M90T | SepA producing strain used as negative control for Sat production detection                                                                                             | Benjelloun-Touimi; Sansonetti; Parsot, (1995) |
| CFT073                        | UPEC prototype strain used as positive control for murine sepsis model validation                                                                                       | Mobley et al. (1990)                          |
| DH5 $\alpha$                  | K-12 <i>E. coli</i> used as pCF3 and pCF4 host and as death control in serum resistance assays                                                                          | Stratagene                                    |
| MG1655                        | K-12 <i>E. coli</i> used as pCF3 and pCF4 host and negative control for murine sepsis model validation                                                                  | Jensen (1993)                                 |
| S17 $\lambda$ pir             | Conjugative K-12 lysogenized for the <i>pir</i> gene, which permits replication of R6K plasmid replicons. Used as pCF2 host and donor strain in <i>sat</i> mutagenesis. | Simon; Proeber; Pühler (1983)                 |
| <b>Plasmids</b>               |                                                                                                                                                                         |                                               |
| pGEM-T Easy                   | LacZ cloning vector (Ap <sup>r</sup> )                                                                                                                                  | Promega                                       |
| pJP5603                       | R6K suicide plasmid (Kn <sup>r</sup> )                                                                                                                                  | Penfold; Pemberton (1992)                     |
| pettac                        | pet22b+ derivative plasmid with tac promoter                                                                                                                            | Serre et al. (2008)                           |

**References**

Benjelloun-Touimi Z, Sansonetti PJ, Parsot C. SepA, the major extracellular protein of *Shigella flexneri*: autonomous secretion and involvement in tissue invasion. Mol Microbiol. 1995;17(1):123–135.

Jensen KF. The *Escherichia coli* K-12 “wild types” W3110 and MG1655 have an *rph* frameshift mutation that leads to pyrimidine starvation due to low *pyrE* expression levels. J Bacteriol. 1993;175(11):3401–3407.

Mobley HLT, Green DM, Trifillis AL, Johnson DE, Chippendale GR, et al. Pyelonephritogenic *Escherichia coli* and killing of cultured human renal proximal tubular epithelial cells: role of hemolysin in some strains. *Infect Immun*. 1990;58(5):1281–1289, 1990.

Penfold RJ, Pemberton JM. An improved suicide vector for construction of chromosomal insertion mutations in bacteria. *Gene*. 1992;118(1):145–146, 1992.

Serre K, Mohr E, Toellner KM, Cunningham AF, Granjeaud S, Bird R, et al. Molecular differences between the divergent responses of ovalbumin-specific CD4 T cells to alum-precipitated ovalbumin compared to ovalbumin expressed by *Salmonella*. *Mol Immun*. 2008;45(13):3558–3566.

Simon R, Proeber U, Pühler A. A broad host range mobilization system for in vivo genetic engineering: transposon mutagenesis in gram negative bacteria. *Bio/Technology*, 1983;1:784–791, 1983.

Taddei CR, Moreno ACR, Fernandes Filho A, Montemor LPG, Martinez MB. Prevalence of secreted autotransporter toxin gene among diffusely adhering *Escherichia coli* isolated from stools of children. *FEMS Microbiol Lett*. 2003;227:249–253.

Vieira PCG, Espinoza-Culupú AO, Nepomuceno R, Alves MR, Lebrun I, Elias WP, et al. Secreted autotransporter toxin (Sat) induces cell damage during enteroaggregative *Escherichia coli* infection. *PLoS One*. 2020;15(2):1–23.
