# Supplementary material for: Secreted Autotransporter Toxin (Sat) Mediates Innate Immune System Evasion
Source: PubMed Central journal article supplement (PMC8891578; doi:10.3389/fimmu.2022.844878), 2022-02-17
Supplement: Table_2.pdf [file Table_2.pdf]

**Supplementary table 2 - Primers used for genetic constructions.**

| Primer                 | Sequence                                                                                             | Reference            |
|------------------------|------------------------------------------------------------------------------------------------------|----------------------|
| <i>sat</i>             | F: TCAGAAGCTCAGCGAATCATTG<br>R: CCATTATCACCAGTAAAACGCACC                                             | Boisen et al. (2009) |
| <i>M13</i>             | F: TGTAACGACGGCCAGT<br>R: CAGGAAACAGCTATGAC                                                          | This study           |
| <i>sat NdeI F</i>      | GATACGCATATGAATAAAATATACTCCCTTAA                                                                     | This study           |
| <i>sat XhoI R</i>      | GTACTGCTCGAGTCAGAAAGAGTAACGGAAGTTGG                                                                  | This study           |
| <i>NdeI pettac</i>     | CAGTCATGCTAGCCATATGTATATC                                                                            | This study           |
| <i>XhoI pettac</i>     | GAAGTGTATAAATGATAACTCGAGCACCAC                                                                       | This study           |
| <i>sat2</i>            | F: GCTGGCTCTGGAGGAACAT<br>R: CCTTACCATTTCCGCTTGC                                                     | This study           |
| <i>pettac F</i>        | ATGGTGCATGCAAGGAGATG                                                                                 | This study           |
| <i>T7 terminator R</i> | GCTAGTTATTGCTCAGCGG                                                                                  | This study           |
| <i>sat sdm</i>         | F: GAAATATTCGGAGACATCGGCCGCTGGAGCATACTTATATGATAAC<br>R: GTTATCATATAAGTATGCTCCAGCGCCGATGTCTCCGAATATTC | This study           |
| <i>Amp</i>             | F: CGAGTGGGTTACATCGAAC<br>R: CGCCTCCATCCAGTCTATTA                                                    | This study           |

## Reference

Boisen N, Ruiz-Perez F, Scheutz F, Krogfelt KA, Nataro JP. Short report: high prevalence of serine protease autotransporter cytotoxins among strains of enteroaggregative *Escherichia coli*. Am J Trop Med Hyg. 2009;80(2):294–301.
