# Supplementary material for: Secreted Autotransporter Toxin (Sat) Mediates Innate Immune System Evasion
Source: PubMed Central journal article supplement (PMC8891578; doi:10.3389/fimmu.2022.844878), 2022-02-17
Supplement: Table_3.pdf [file Table_3.pdf]

**Supplementary table 3** – EC071 genetic background analysis by whole genome sequencing.

| Group                             | Gene              | Reference Sequence (Genbank accession number) | Reference Strain                                        | EC071               |
|-----------------------------------|-------------------|-----------------------------------------------|---------------------------------------------------------|---------------------|
| SPATEs-encoding genes             | <i>eatA</i>       | AY163491                                      | <i>E. coli</i> H10407                                   | No similarity found |
|                                   | <i>epeA</i>       | AY258503.2                                    | <i>E. coli</i> O113:H21 EH41, plasmid pO113             | No similarity found |
|                                   | <i>espC</i>       | AF297061                                      | <i>E. coli</i> E2348/69                                 | No similarity found |
|                                   | <i>espl</i>       | AJ278144.1                                    | <i>E. coli</i> O91:H- 4797/97                           | No similarity found |
|                                   | <i>espP</i>       | X97542.1                                      | <i>E. coli</i> EDL933                                   | No similarity found |
|                                   | <i>sigA</i>       | AF200692.2                                    | <i>S. flexneri</i> 2a                                   | No similarity found |
|                                   | <i>pic</i>        | NC_017626.1                                   | <i>E. coli</i> 042                                      | No similarity found |
|                                   | <i>sepA</i>       | CP037924.1                                    | <i>S. flexneri</i> 5a cepa M90T, plasmid pWR100         | No similarity found |
|                                   | <i>tsh</i>        | NC_009837.1                                   | <i>E. coli</i> O1:K1:H7 APEC O1, plasmid pAPEC-O1-CoIBM | No similarity found |
|                                   | <i>vat</i>        | AE014075.1                                    | <i>E. coli</i> O6:K2:H1 CFT073                          | No similarity found |
|                                   | <i>pet</i>        | NC_017627.1                                   | <i>E. coli</i> 042, plasmid pAA                         | No similarity found |
|                                   | <i>tagB</i>       |                                               |                                                         | No similarity found |
|                                   | <i>tagC</i>       | MH899681.1                                    | <i>E. coli</i> QT598                                    | No similarity found |
|                                   | <i>sha</i>        | MH899684.1                                    | <i>E. coli</i> strain QT598, plasmid Sha                | No similarity found |
| Intrinsic virulence-related genes | <i>kpsM</i>       |                                               |                                                         | No similarity found |
|                                   | <i>kpsT</i>       |                                               |                                                         | No similarity found |
|                                   | <i>iutA</i>       |                                               |                                                         | No similarity found |
|                                   | <i>iucD</i>       | AE014075.1                                    | <i>E. coli</i> CFT073                                   | No similarity found |
|                                   | <i>focAICDFGH</i> |                                               |                                                         | No similarity found |
|                                   | <i>sfaADEFGS</i>  |                                               |                                                         | No similarity found |
|                                   | <i>H</i>          |                                               |                                                         | No similarity found |
|                                   | <i>papIBAHCDJ</i> |                                               |                                                         |                     |
|                                   | <i>KEFG</i>       |                                               |                                                         | +                   |
|                                   | <i>afaABCDE</i>   | FM955458.1                                    | <i>E. coli</i> FV9863                                   | +                   |
| <i>draABCDE</i>                   | AF329316.1        | <i>E. coli</i> IH11128                        | +                                                       |                     |

Supplementary table 3 – cont.

| Group           | Gene                | Reference Sequence (Genbank accession number) | Reference Strain              | EC071                         |                             |
|-----------------|---------------------|-----------------------------------------------|-------------------------------|-------------------------------|-----------------------------|
| Group 2-capsule | <i>kpsF-II</i>      | NC_017631.1                                   | <i>E. coli</i> ABU 83972      | +                             |                             |
|                 | <i>kpsE-II</i>      |                                               |                               | +                             |                             |
|                 | <i>kpsD-II</i>      |                                               |                               | +                             |                             |
|                 | <i>kpsU-II</i>      |                                               |                               | +                             |                             |
|                 | <i>kpsC-II</i>      |                                               |                               | +                             |                             |
|                 | <i>kpsS-II</i>      |                                               |                               | +                             |                             |
|                 | <i>kpsM-II-K5</i>   | AE014075.1                                    | <i>E. coli</i> CFT073 (O6:H1) | No similarity found           |                             |
|                 | <i>kpsT-II-K5</i>   |                                               |                               | No similarity found           |                             |
|                 | <i>kpsM-K2</i>      |                                               |                               | No similarity found           |                             |
|                 | <i>kpsT-K2</i>      |                                               |                               | No similarity found           |                             |
|                 | <i>neuS</i>         |                                               |                               | No similarity found           |                             |
|                 | <i>neuE</i>         |                                               |                               | No similarity found           |                             |
|                 | Group 2-capsule     | <i>neuC</i>                                   | NC_007946.1                   | <i>E. coli</i> UT189 (O18:H7) | No similarity found         |
|                 |                     | <i>neuA</i>                                   |                               |                               | No similarity found         |
|                 |                     | <i>neuB</i>                                   |                               |                               | No similarity found         |
| <i>neuD</i>     |                     | No similarity found                           |                               |                               |                             |
| <i>kpsT-K1</i>  |                     | No similarity found                           |                               |                               |                             |
| <i>kpsM-K1</i>  |                     | No similarity found                           |                               |                               |                             |
| <i>kpsC'-K5</i> |                     | NC_008253.1                                   |                               |                               | <i>E. coli</i> 536 (O6:H31) |
| <i>kpsS-K10</i> | +                   |                                               |                               |                               |                             |
| <i>kpsC-K10</i> | No similarity found |                                               |                               |                               |                             |
| <i>kpsT-K15</i> | No similarity found |                                               |                               |                               |                             |
| <i>kpsM-K15</i> | No similarity found |                                               |                               |                               |                             |
| Group 3-capsule | <i>kpsD-III</i>     | NZ_JDRV01000043.1                             | <i>E. coli</i> MS499          | No similarity found           |                             |
|                 | <i>kpsM-III</i>     |                                               |                               | No similarity found           |                             |
|                 | <i>kpsT-III</i>     |                                               |                               | No similarity found           |                             |
|                 | <i>kpsE-III</i>     |                                               |                               | No similarity found           |                             |
|                 | <i>kpsC-III</i>     |                                               |                               | No similarity found           |                             |
| Group 4-capsule | <i>kpsS-III</i>     | NZ_CP009166.1                                 | <i>E. coli</i> 1303 (O70:H32) | +                             |                             |
|                 | <i>gfcA</i>         |                                               |                               | No similarity found           |                             |
|                 | <i>gfcB</i>         |                                               |                               | No similarity found           |                             |
|                 | <i>gfcC</i>         |                                               |                               | No similarity found           |                             |
|                 | <i>gfcD</i>         |                                               |                               | No similarity found           |                             |
|                 | <i>gfcE</i>         |                                               |                               | No similarity found           |                             |
|                 | <i>etp</i>          |                                               |                               | No similarity found           |                             |
| <i>etk</i>      | No similarity found |                                               |                               |                               |                             |

**Supplementary table 3 - cont.**

| Group                   | Gene                        | Reference Sequence (Genbank accession number) | Reference Strain                                       | EC071               |
|-------------------------|-----------------------------|-----------------------------------------------|--------------------------------------------------------|---------------------|
| Outer membrane proteins | <i>ompP</i>                 | X74278.1                                      |                                                        | No similarity found |
|                         | <i>ompX</i> ( <i>ompP</i> ) | U00096.3                                      | <i>E. coli</i> K-12 MG1655                             | +                   |
|                         | <i>ompTc</i>                | NC_008563.1                                   | <i>E. coli</i> APEC O1(O1:H7)                          | +                   |
|                         | <i>ompTp</i>                | NC_007675.1                                   | <i>E. coli</i> APEC A2363, plasmid pAPEC-O2-ColV       | +                   |
| Proteases               | <i>stcE</i>                 | CP000244.1                                    | <i>E. coli</i> EDL933 (O157:H7)                        | No similarity found |
|                         | <i>prc</i>                  | NC_000913.3                                   | <i>E. coli</i> K-12 MG1655                             | +                   |
|                         | <i>nlpI</i>                 | CU928161.2                                    | <i>E. coli</i> S88 (O45:H7)                            | +                   |
| Protectins              | <i>bor/ iss</i>             | NC_009837.1                                   | <i>E. coli</i> APEC O1 (O1:H7), plasmid pAPEC-O1-ColBM | No similarity found |
|                         | <i>traT</i>                 | J01769.1                                      | <i>E. coli</i> plasmid R100                            | No similarity found |
