# Supplementary material for: Secreted Autotransporter Toxin (Sat) Mediates Innate Immune System Evasion
Source: PubMed Central journal article supplement (PMC8891578; doi:10.3389/fimmu.2022.844878), 2022-02-17
Supplement: Table_4.pdf [file Table_4.pdf]

**Supplementary table 4** - EC071 whole genome sequencing metrics <sup>a</sup>.

| <b>Parameters</b> |           |
|-------------------|-----------|
| Size (pb)         | 5 271 699 |
| Contigs           | 262       |
| Genes             | 5139      |
| N50 <sup>b</sup>  | 86 427    |
| N75 <sup>c</sup>  | 42 340    |
| L50 <sup>d</sup>  | 19        |
| L75 <sup>e</sup>  | 40        |
| G+C (%)           | 50,53     |
| Coverage          | 141x      |

<sup>a</sup> Calculated using the QCAST platform (Gurevich et al., 2013).

<sup>b</sup> Base pair (bp) size that contigs with this or bigger size include half the total of bases.

<sup>c</sup> Base pair (bp) size that contigs with this or bigger size include  $\frac{3}{4}$  of the total of bases.

<sup>d</sup> Number of contigs that are bigger or have the same N50 size.

<sup>e</sup> Number of contigs that are bigger or have the same N75 size.

## Reference

Gurevich A, Saveliev V, Vyahhi N, Tesler G. QCAST: Quality assessment tool for genome assemblies. *Bioinformatics*, 2013;29:1072-1075.
